# Supplementary material for: Metallophthalocyanines in a ternary photoactive layer (P3HT:MPc:PC70BM) for bulk heterojunction solar cells
Source: Royal Society of Chemistry journal article supplement (doi:10.1039/d0ma00725k), 2020-01-01
Supplement: d0ma00725k1.pdf [file d0ma00725k1.pdf]

## ELECTRONIC SUPPLEMENTARY INFORMATION

### **Metallophthalocyanines in a ternary photoactive layer (P3HT:MPc:PC<sub>70</sub>BM) for bulk heterojunction solar cells**

Denisha Gounden, Michael N. Pillay, Timo Raab, Nolwazi Nombona, Lukas Schmidt-Mende and Werner E. van Zyl

#### CONTENTS

- (a) Elemental analysis report
- (b) FT-IR spectra
- (c) Mass spectrometry spectra
- (d) UV-vis spectroscopy
- (e) Tauc plots
- (f) PESA plots
- (g) DFT Study - Optimised cartesian coordinates
- (h) TGA – Tabulated degradation profiles and curves
- (i) Bulk heterojunction solar cell fabrication and characterisation
- (j) UV-vis spectroscopy: Optimisation of MPc concentration
- (k) J-V curve: Reverse scans
- (l) Performance parameters ( $J_{SC}$ ,  $V_{OC}$ , FF, PCE): Reverse scans
- (m) Comparative forward and reverse scans

## (a) Elemental analysis report

INSTALLATION TEST - 25\_03\_2019

varioELcube

serial number: 19181072

### Text report

---

| No. | Name     | N [%] | C [%] | H [%] | S [%] |
|-----|----------|-------|-------|-------|-------|
| 22  | Ligand 2 | 23.41 | 54.78 | 1.95  | 0.128 |

INSTALLATION TEST - 25\_03\_2019

varioELcube

serial number: 19181072

### Text report

---

| No. | Name     | N [%] | C [%] | H [%] | S [%] |
|-----|----------|-------|-------|-------|-------|
| 12  | Ligand A | 10.09 | 77.89 | 6.048 | 0.254 |
| 13  | Ligand B | 10.31 | 79.31 | 3.804 | 0.091 |
| 14  | Ligand C | 10.74 | 72.65 | 3.835 | 0.062 |
| 15  | Ligand D | 11.27 | 64.58 | 2.954 | 0.059 |

INSTALLATION TEST - 25\_03\_2019

varioELcube

serial number: 19181072

### Text report

---

| No. | Name     | O [%]  | Date       | Time  |
|-----|----------|--------|------------|-------|
| 12  | Ligand A | 6.697  | 2020/03/13 | 12:08 |
| 13  | Ligand B | 7.046  | 2020/03/13 | 12:19 |
| 14  | Ligand C | 12.884 | 2020/03/13 | 12:31 |
| 15  | Ligand D | 21.150 | 2020/03/13 | 12:42 |

## (b) FT-IR spectra

The FT-IR spectrum (Figure S1) of compound **1** shows a C≡N band at 2239 cm<sup>-1</sup> and two intense, characteristic bands at 1535 cm<sup>-1</sup> and 1345 cm<sup>-1</sup> corresponding to the asymmetric and symmetric stretching of the NO<sub>2</sub> functional group respectively. The conversion of compound **1** to compounds **2a**, **2b**, **2c** and **2d** were confirmed by the disappearance of the NO<sub>2</sub> bands and the appearance of bands in the 1244 - 1248 cm<sup>-1</sup> region belonging to the newly formed diaryl ether linkage (C-O-C) (Figure S1). The FT-IR spectra for all 16 metal phthalocyanines can be viewed in the supplementary materials section (Figures S2-S5) and show an expected disappearance of the C≡N band indicating the conversion of the dinitrile precursors to metal Pcs. Bands appearing in the 1240 – 1220 cm<sup>-1</sup> region confirm the peripherally attached substituents. Table S1 provides detailed band assignment for the C-H, C-C and C-N originating from the phthalocyanine skeleton.

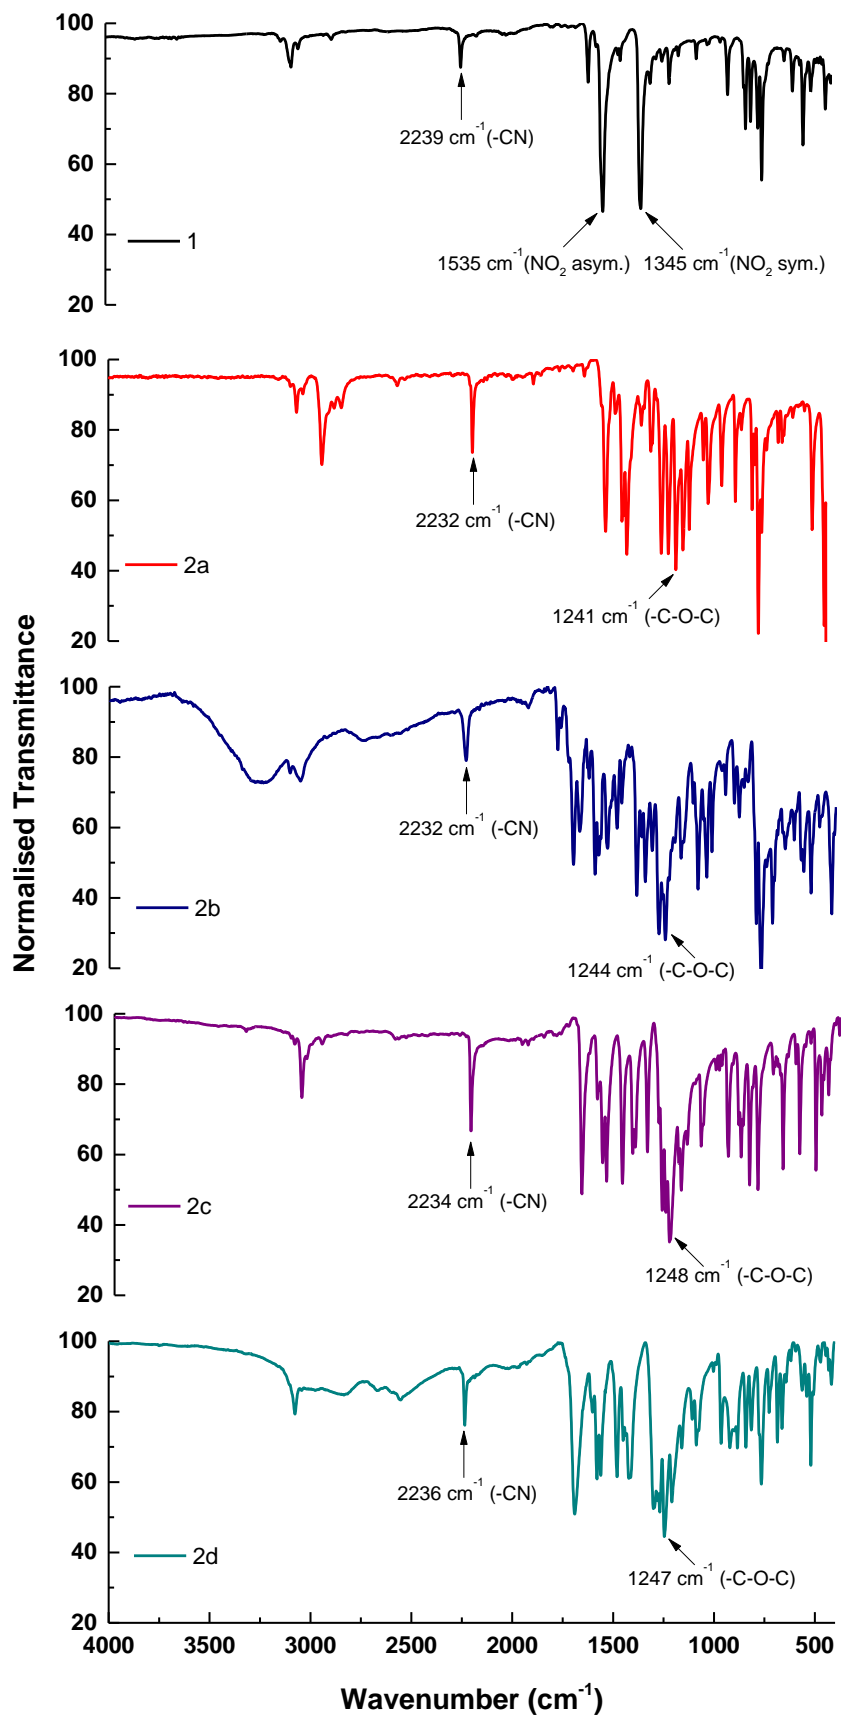

Figure S1. FT-IR spectra of 4-nitrothalonitrile (**1**) and substituted thalonitriles (**2a-2d**).

Table S1. FTIR absorption bands (cm<sup>-1</sup>) of MPc complexes (3a-3d, 4a-4d, 5a-5d and 6a-6d).

| Band Assignment (cm <sup>-1</sup> ) |          |           |                       |            |                 |       |                      |                           |                       |                               |                               |             |
|-------------------------------------|----------|-----------|-----------------------|------------|-----------------|-------|----------------------|---------------------------|-----------------------|-------------------------------|-------------------------------|-------------|
| Metal complex                       | C-H sym. | C-H asym. | C-C stretch (pyrrole) | C-H (aryl) | C-C (isoindole) | C-O-C | C-N ( $\beta^{**}$ ) | C-H bend ( $\beta^{**}$ ) | C-N stretch (pyrrole) | C-H deform. ( $\gamma^{**}$ ) | C-H deform. ( $\gamma^{**}$ ) | C-N stretch |
| <b>3a</b>                           | 2958     | 2865      | 1602                  | 1467       | 1334            | 1237  | 1175                 | 1081                      | 1052                  | 890                           | 870                           | 745         |
| <b>3b</b>                           | 2959     | 2850      | 1605                  | 1466       | 1333            | 1233  | 1161                 | 1093                      | 1063                  | 908                           | 874                           | 750         |
| <b>3c</b>                           | 2958     | 2865      | 1599                  | 1471       | 1329            | 1237  | 1169                 | 1070                      | 1050                  | 890                           | 870                           | 746         |
| <b>3d</b>                           | 2958     | 2866      | 1597                  | 1465       | 1332            | 1231  | 1163                 | 1073                      | 1049                  | 895                           | 871                           | 745         |
|                                     |          |           |                       |            |                 |       |                      |                           |                       |                               |                               |             |
| <b>4a</b>                           | 2920     | 2850      | 1604                  | 1461       | 1337            | 1237  | 1164                 | 1094                      | 1056                  | 908                           | 878                           | 747         |
| <b>4b</b>                           | 2922     | 2857      | 1595                  | 1457       | 1324            | 1224  | 1151                 | 1088                      | 1056                  | 913                           | 879                           | 744         |
| <b>4c</b>                           | 2927     | 2853      | 1596                  | 1455       | 1324            | 1221  | 1152                 | 1070                      | 1048                  | 909                           | 872                           | 743         |
| <b>4d</b>                           | 2926     | 2851      | 1595                  | 1459       | 1331            | 1227  | 1150                 | 1072                      | 1050                  | 903                           | 871                           | 743         |
|                                     |          |           |                       |            |                 |       |                      |                           |                       |                               |                               |             |
| <b>5a</b>                           | 2919     | 2851      | 1604                  | 1463       | 1336            | 1237  | 1166                 | 1093                      | 1057                  | 907                           | 878                           | 750         |
| <b>5b</b>                           | 2921     | 2855      | 1594                  | 1458       | 1325            | 1221  | 1155                 | 1086                      | 1055                  | 909                           | 878                           | 745         |
| <b>5c</b>                           | 2925     | 2855      | 1594                  | 1457       | 1326            | 1220  | 1153                 | 1068                      | 1050                  | 911                           | 874                           | 744         |
| <b>5d</b>                           | 2927     | 2853      | 1594                  | 1461       | 1328            | 1225  | 1151                 | 1072                      | 1049                  | 902                           | 872                           | 745         |
|                                     |          |           |                       |            |                 |       |                      |                           |                       |                               |                               |             |
| <b>6a</b>                           | 2927     | 2865      | 1600                  | 1459       | 1331            | 1229  | 1163                 | 1092                      | 1052                  | 895                           | 875                           | 747         |
| <b>6b</b>                           | 2921     | 2853      | 1604                  | 1467       | 1332            | 1232  | 1160                 | 1093                      | 1059                  | 908                           | 880                           | 750         |
| <b>6c</b>                           | 2921     | 2853      | 1603                  | 1467       | 1331            | 1228  | 1159                 | 1094                      | 1066                  | 908                           | 871                           | 750         |
| <b>6d</b>                           | 2929     | 2856      | 1597                  | 1464       | 1332            | 1230  | 1163                 | 1072                      | 1050                  | 895                           | 873                           | 745         |

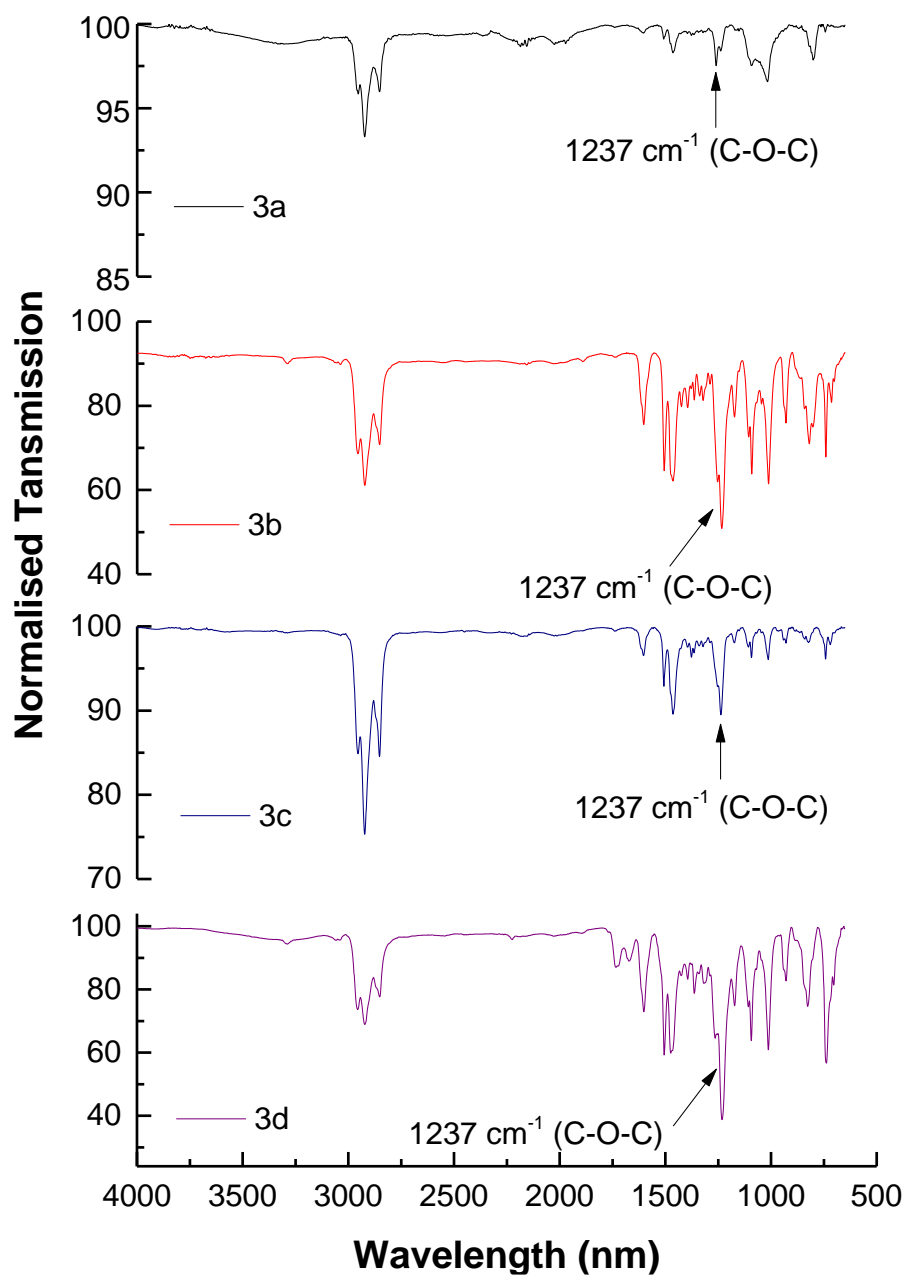

Figure S2. FT-IR spectra of CoPc complexes (**3a-3d**).

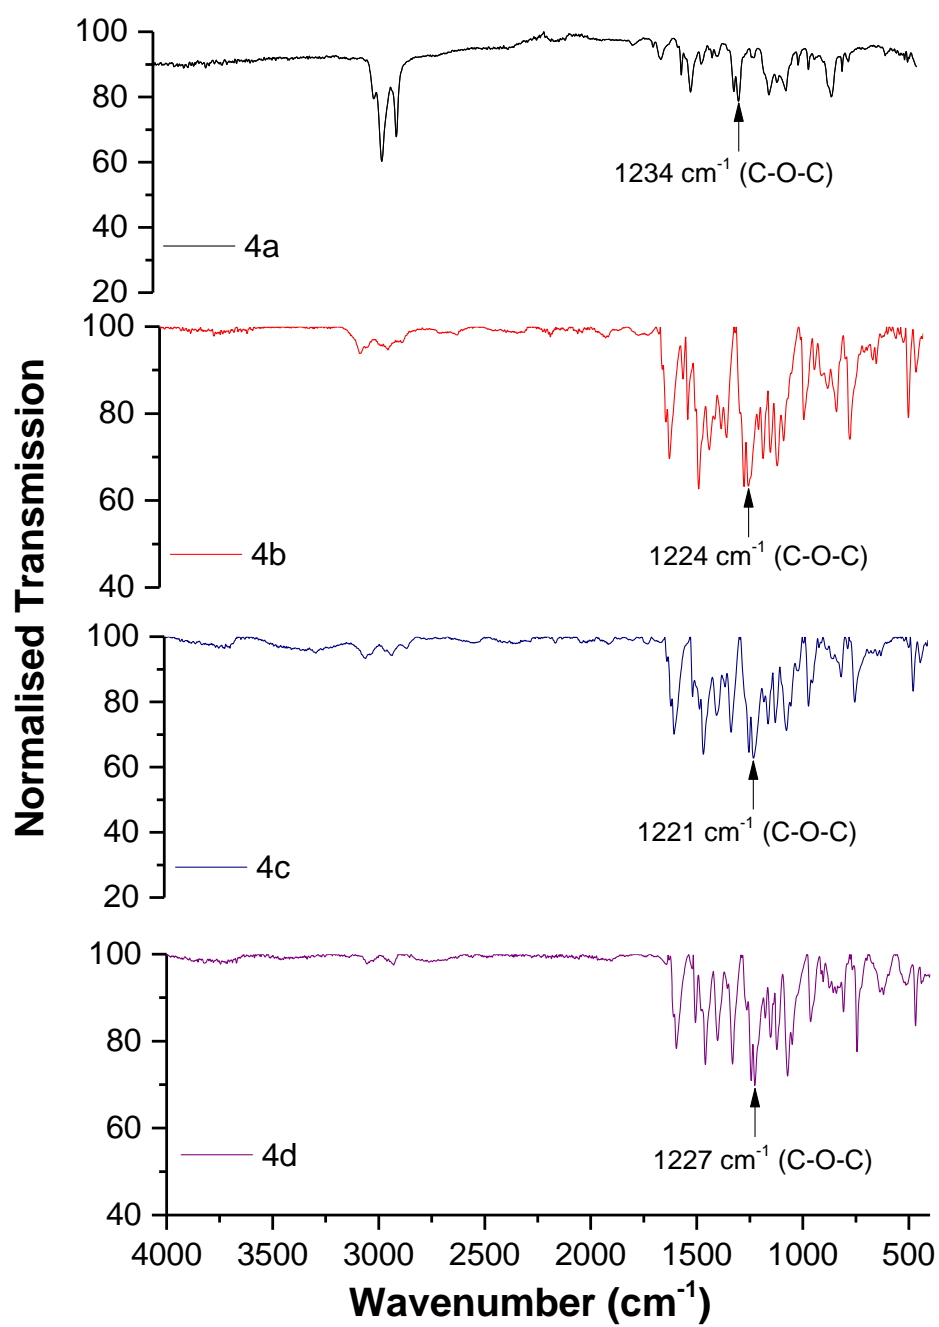

Figure S3. FT-IR spectra of NiPc complexes (4a-4d).

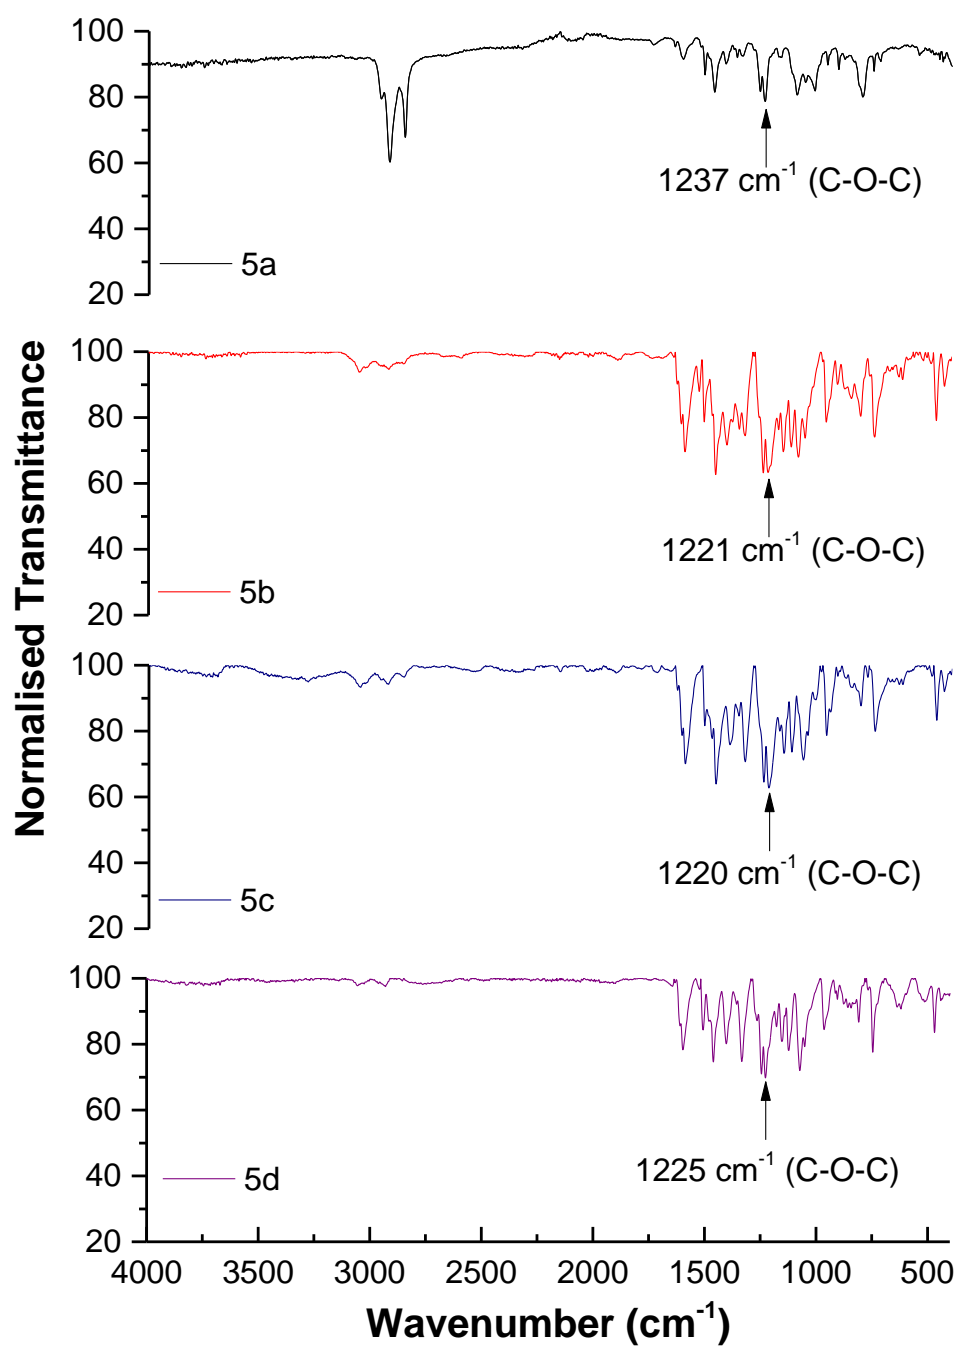

Figure S4. FT-IR spectra of TiPc complexes (5a-5d).



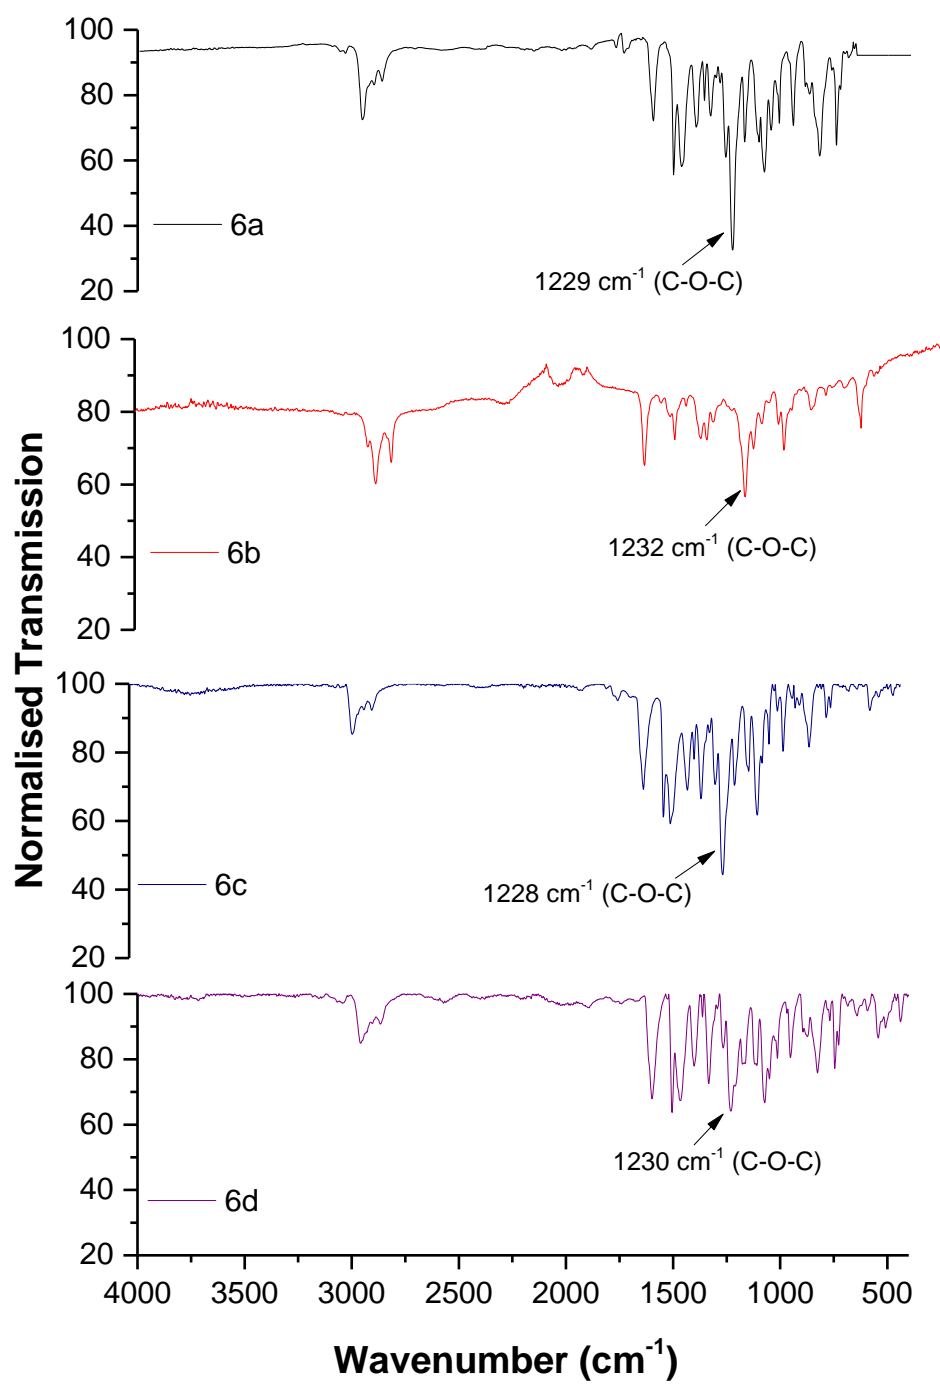

Figure S5. FT-IR spectra of MnPc complexes (**6a-6d**).

### (c) Mass spectroscopy

The MALDI-TOF spectra (Figures S6-S9) provided evidence for the successful synthesis of complexes **3a-3d**, **4a-4d** and **5a-5d** with molecular ion peaks that match well with the calculated molecular weights. Molecular ion peaks for Mn containing complexes (**6a-6d**), were not observed in the MALDI-TOF spectra. However, base peaks corresponding to MnPcs with cleaved axial Mn-Cl bonds were detected at 1162, 1138, 1105, 1114  $m/z$  respectively.

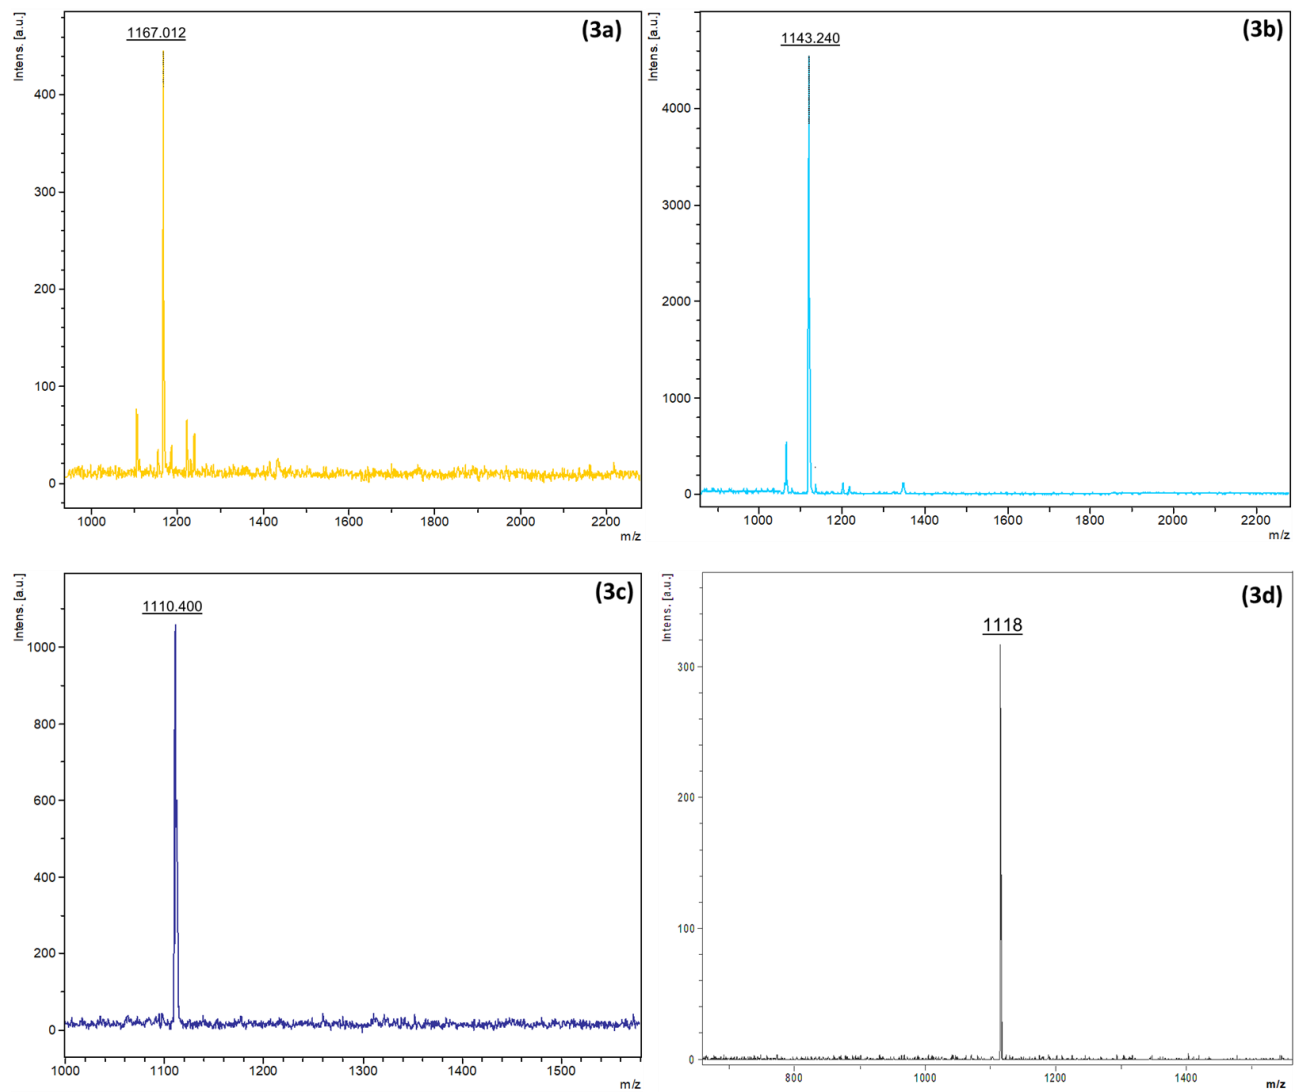

Figure S6. Mass spectra of CoPc complexes (**3a-3d**).

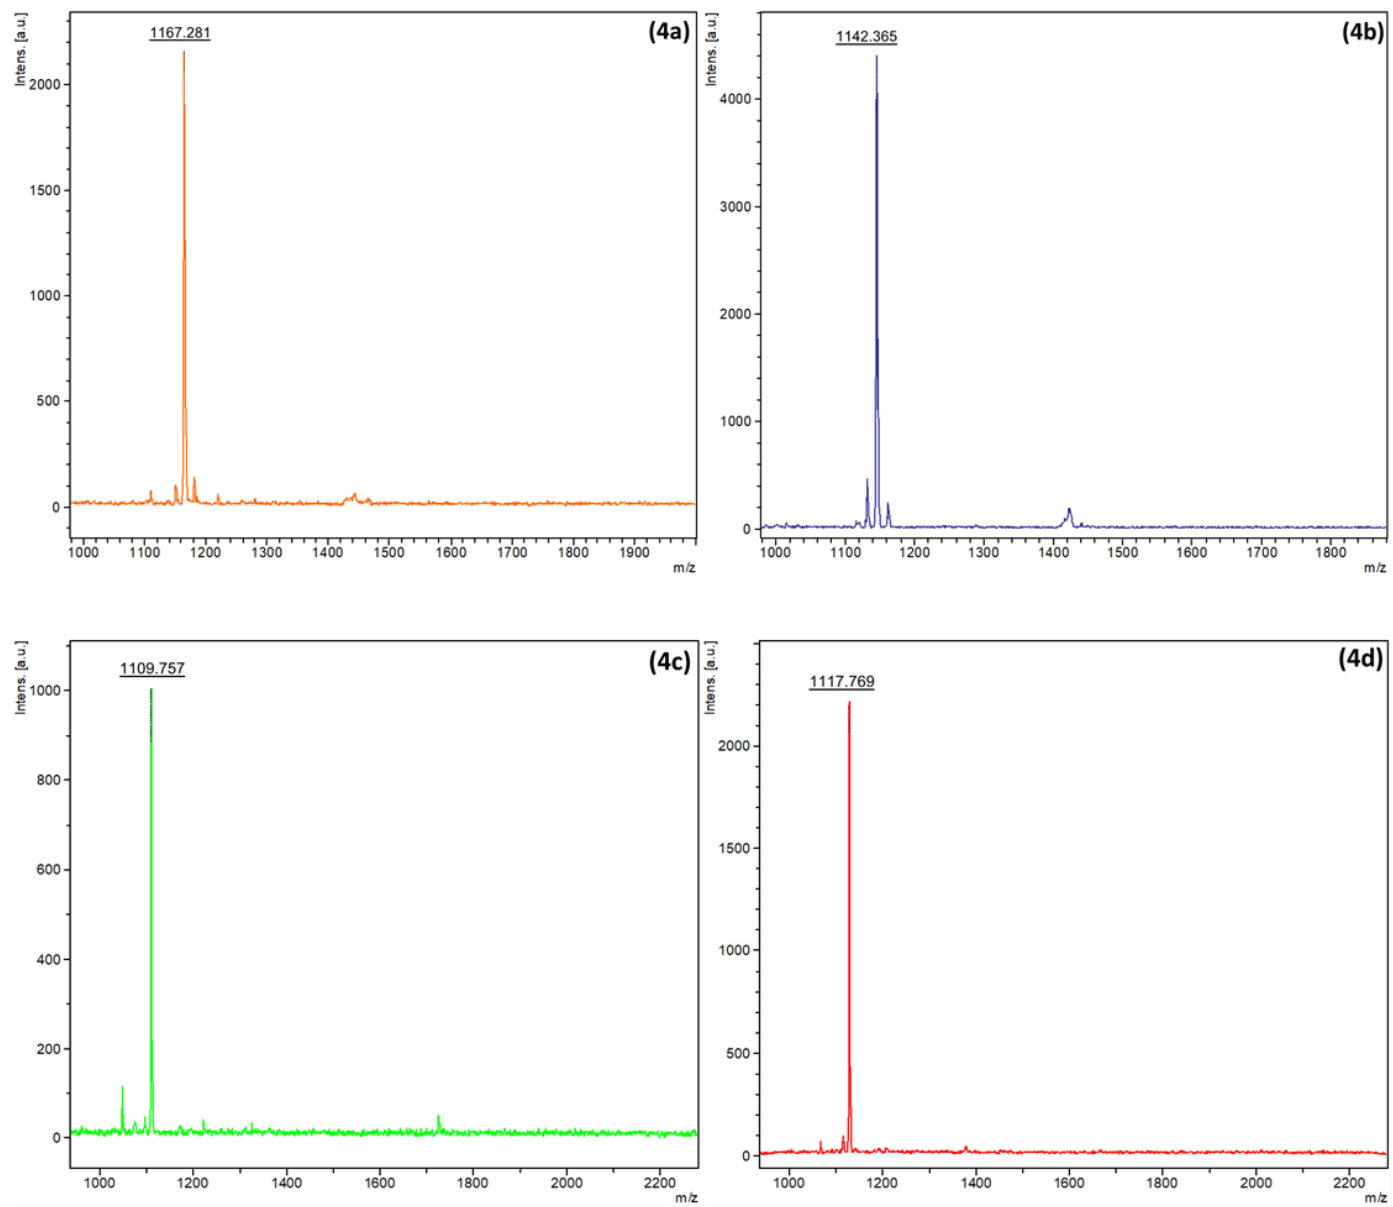

Figure S7. Mass spectra of NiPc complexes (4a-4d).

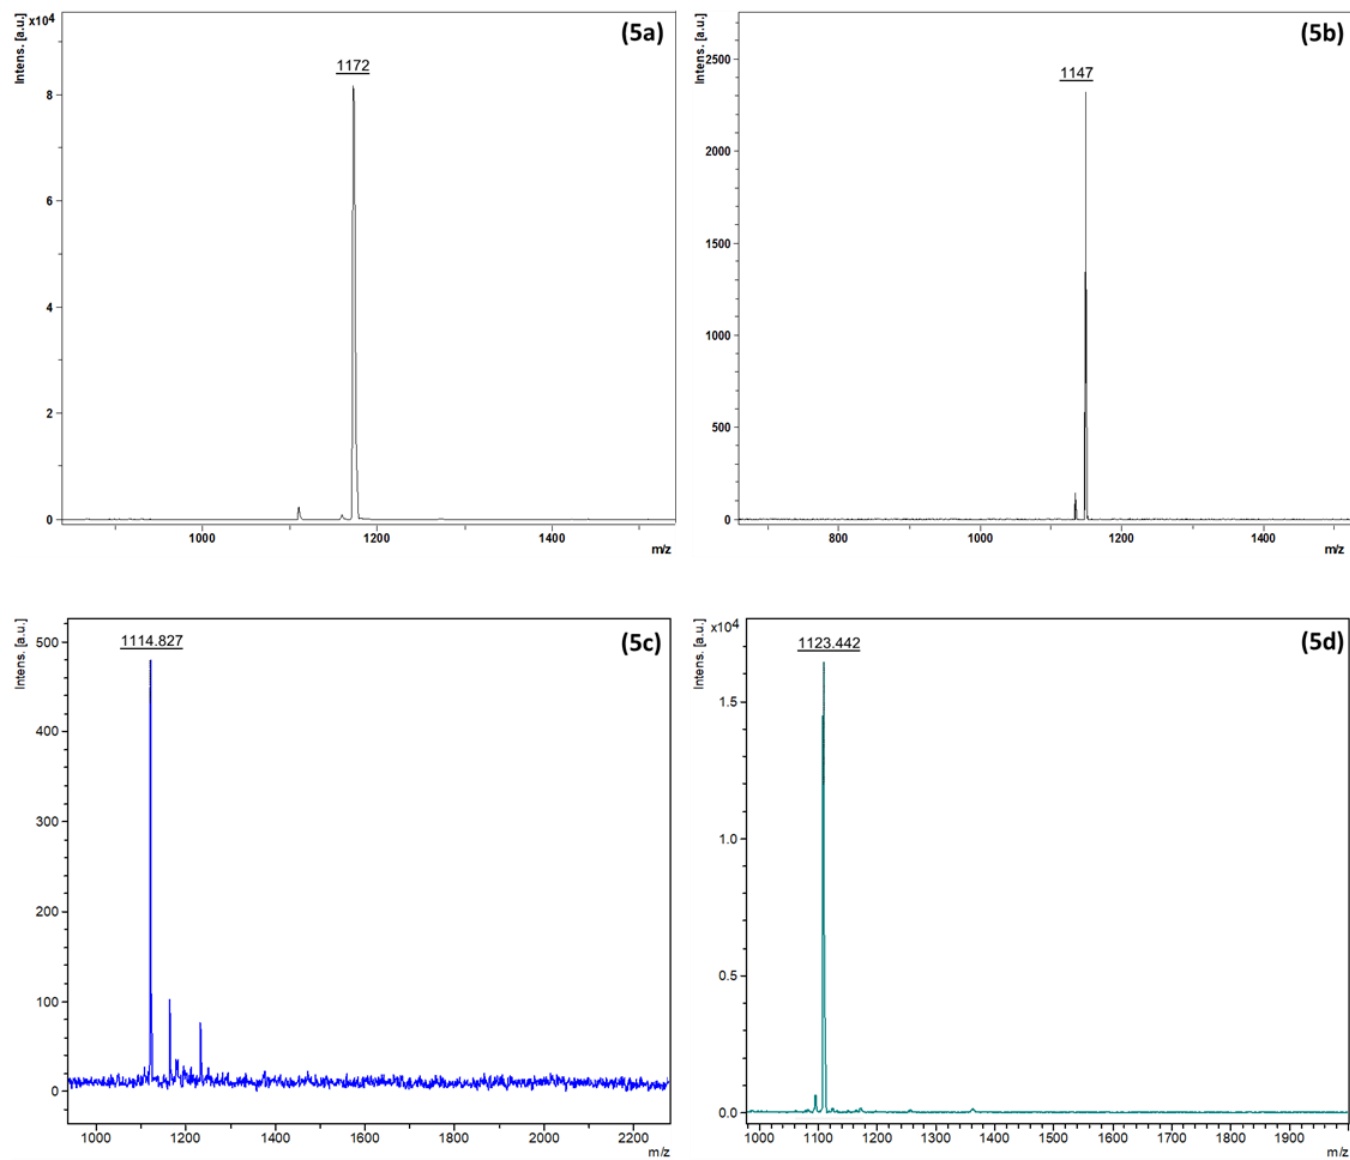

Figure S8. Mass spectra of TiPc complexes (5a-5d).

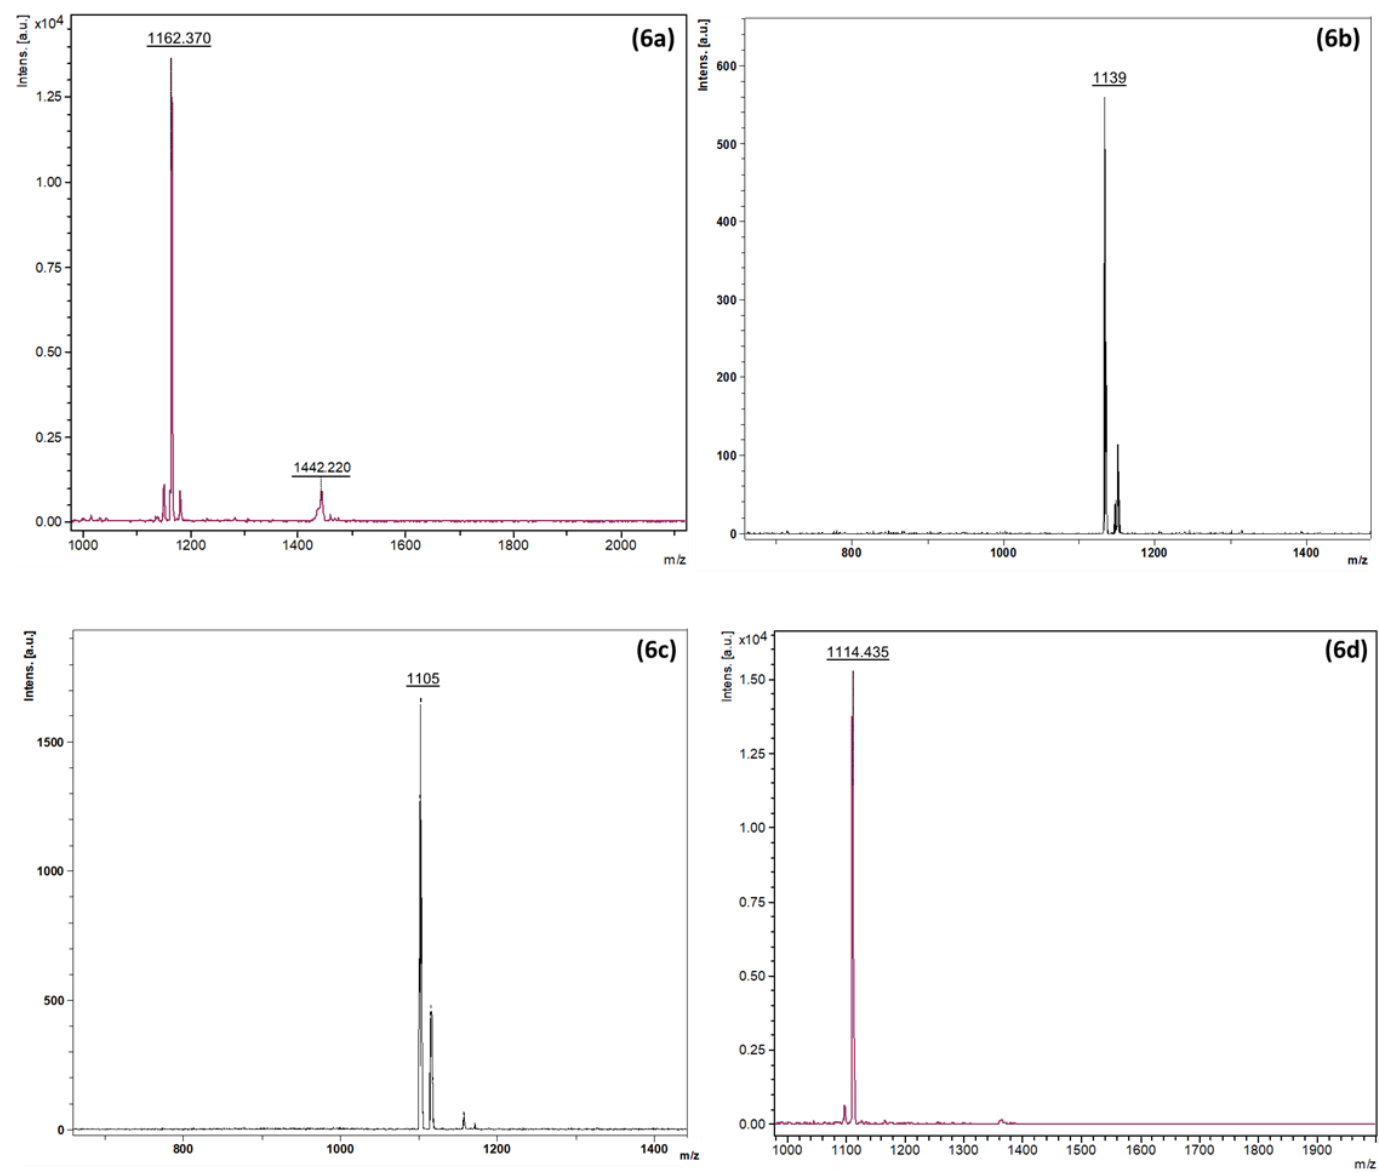

Figure S9. Mass spectra of MnPc complexes (**6a-6d**).

### (d) UV-vis spectroscopy

Table S2. Main UV-vis absorption maxima of the Co, Ni, Ti and Mn Pcs in solution (solvent: CH<sub>3</sub>Cl<sup>a</sup> or THF<sup>b</sup>) and solid-state.

| Metal | Substituent    | Solution |          |        |         | Solid  |        |
|-------|----------------|----------|----------|--------|---------|--------|--------|
|       |                | Q (nm)   | VB (nm)  | B (nm) | CT band | Q (nm) | B (nm) |
| Co    | 1 <sup>a</sup> | 672      | 607      | 325    | ×       | 614    | 360    |
|       | 2 <sup>a</sup> | 672      | 607      | 326    | ×       | 619    | 361    |
|       | 3 <sup>a</sup> | 669      | 605      | 320    | ×       | 614    | 370    |
|       | 4 <sup>a</sup> | 672      | 605      | 322    | ×       | 619    | ×      |
| Ni    | 1 <sup>b</sup> | 674      | 607      | 329    | ✓       | 608    | 369    |
|       | 2 <sup>b</sup> | 674      | 607; 646 | 328    | ✓       | 614    | 367    |
|       | 3 <sup>b</sup> | 673      | 607; 644 | 329    | ✓       | 617    | 363    |
|       | 4 <sup>b</sup> | 673      | 608; 644 | 328    | ✓       | 611    | 358    |
| Ti    | 1 <sup>a</sup> | 704      | 634      | 346    | ✓       | 700    | 360    |
|       | 2 <sup>a</sup> | 703      | 668; 634 | 346    | ✓       | 707    | 360    |
|       | 3 <sup>a</sup> | 702      | 667; 636 | 341    | ✓       | 700    | 360    |
|       | 4 <sup>a</sup> | 701      | 666; 634 | 344    | ✓       | 702    | 360    |
| Mn    | 1 <sup>a</sup> | 734      | 662      | 373    | ✓       | 721    | 379    |
|       | 2 <sup>a</sup> | 734      | 662      | 391    | ✓       | 723    | 367    |
|       | 3 <sup>a</sup> | 719      | ×        | 353    | ✓       | 727    | 367    |
|       | 4 <sup>a</sup> | 729      | 657      | 358    | ✓       | 718    | 370    |

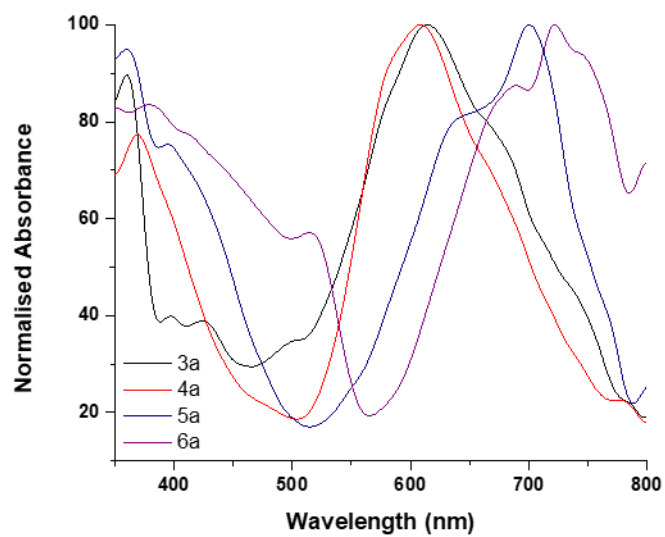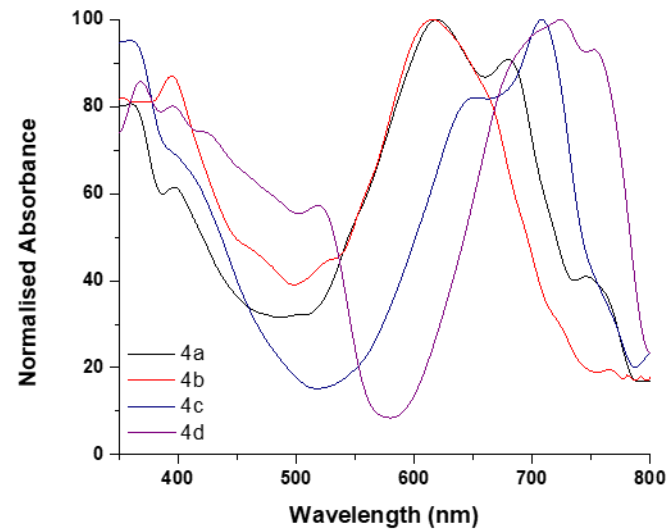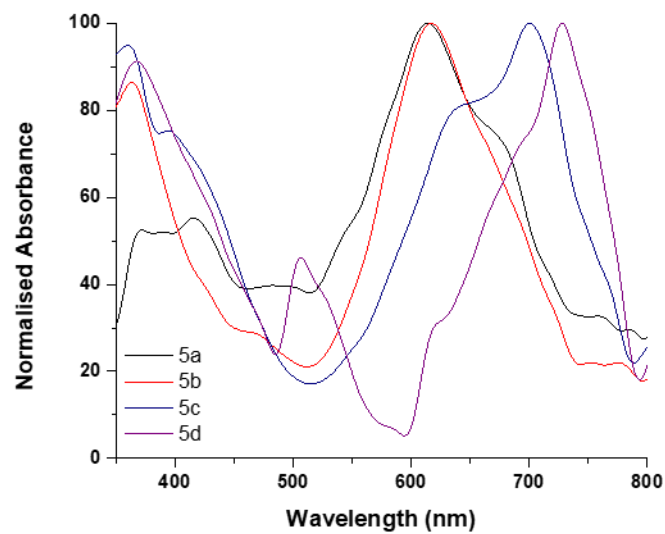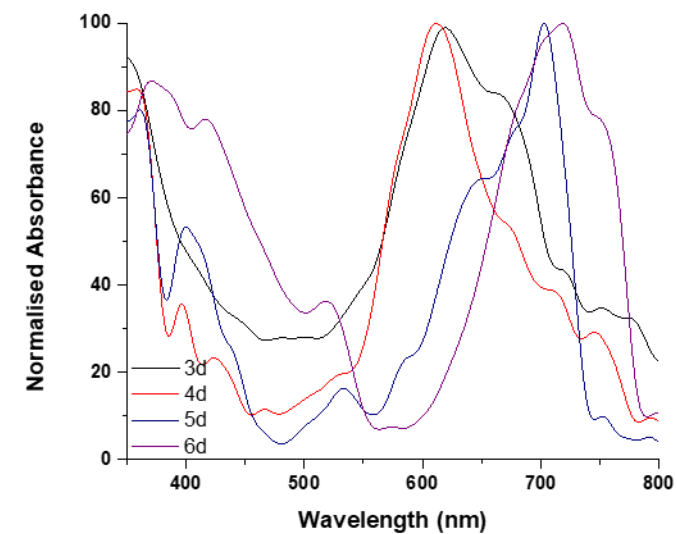

Figure S10. UV-vis absorption spectra of MPC complexes (3a-3d, 4a-4d, 5a-5d and 6a-6d) spin-coated on glass substrates.



Table S3. Absorption co-efficient ( $\epsilon$ ) for CoPcs (**3a**, **3c** and **3d**), TiPcs (**5a**, **5c** and **5d**) and MnPcs (**6a**, **6c** and **6d**).

| <b>Metal</b> | <b>Substituent</b> | <b>Absorption co-efficient (<math>\epsilon</math>), M<sup>-1</sup> cm<sup>-1</sup></b> |
|--------------|--------------------|----------------------------------------------------------------------------------------|
| <b>Co</b>    | <b>3a</b>          | 3.54                                                                                   |
|              | <b>3c</b>          | 3.47                                                                                   |
|              | <b>3d</b>          | 3.46                                                                                   |
| <b>Ti</b>    | <b>5a</b>          | 3.64                                                                                   |
|              | <b>5c</b>          | 3.66                                                                                   |
|              | <b>5d</b>          | 3.68                                                                                   |
| <b>Mn</b>    | <b>6a</b>          | 3.69                                                                                   |
|              | <b>6c</b>          | 3.75                                                                                   |
|              | <b>6d</b>          | 3.75                                                                                   |

### (e) Bandgap energy - Tauc plots

The Tauc and Davis-Mott relationship was used to determine the optical band gap ( $E_g$ ) of the MPcs and is represented by the equation below:

$$(\alpha h\nu)^n = K (h\nu - E_g)$$

where  $\alpha$  is the absorption coefficient,  $h$  is Planck's constant,  $\nu$  is the photon's frequency,  $K$  is an energy-dependent constant,  $E_g$  is the bandgap, and the exponent  $n$  represents the nature of the transition and may take on values  $n = \frac{1}{2}, 1, \frac{3}{2}$  or  $2$ , depending upon the nature of the electronic transitions (i.e. allowed or forbidden) responsible for the absorption. As the nature of the electronic transition between the  $a_{1u}$  and  $e_g$  energy levels is direct and allowed, a value of  $n = \frac{1}{2}$  was used for the calculations. The  $E_g$  values were obtained by extrapolation of  $(\alpha h\nu)^{n=\frac{1}{2}} = 0$ . The Tauc plots for the MPcs can be viewed in Figures S11-S14 and the Tauc plots of the PC<sub>70</sub>BM and P3HT in Figure S15.

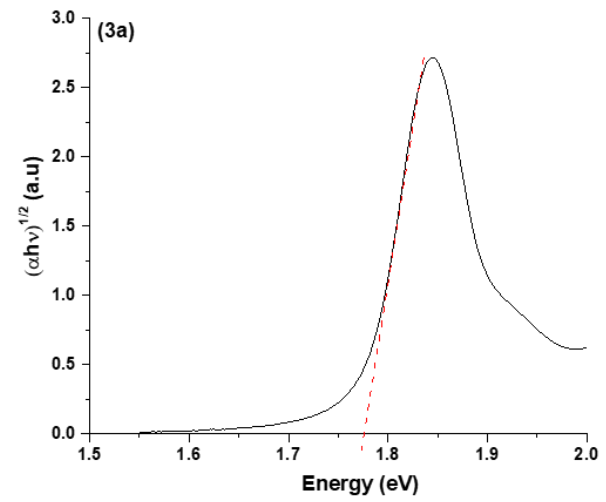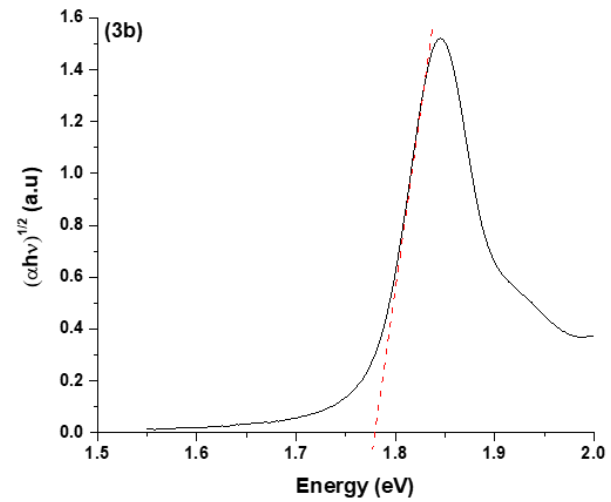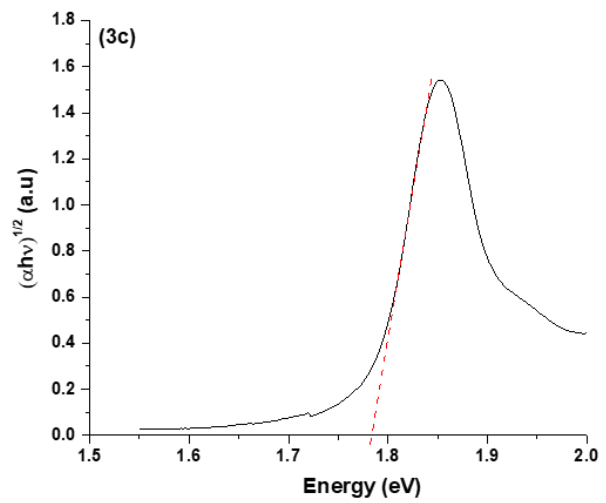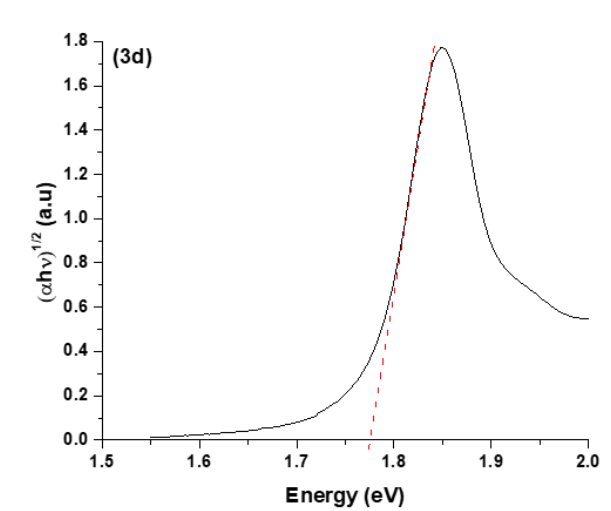

Figure S11. Tauc plots of CoPc complexes (3a-3d).

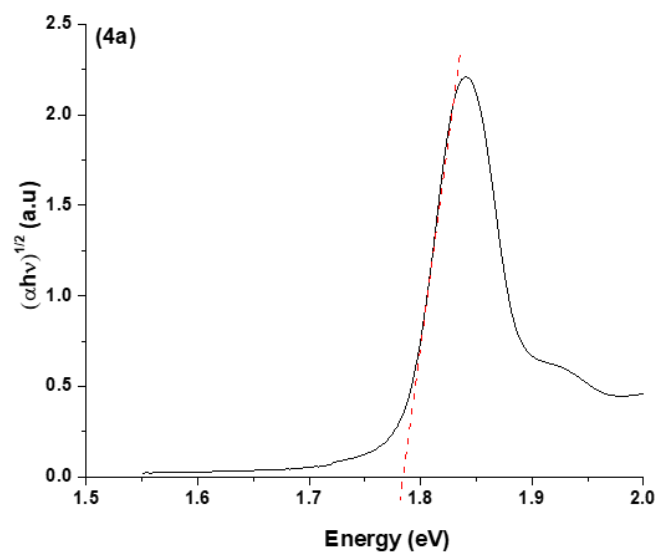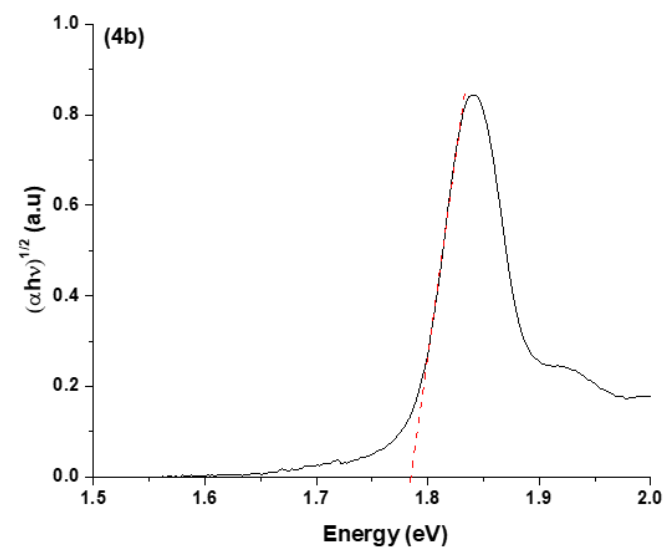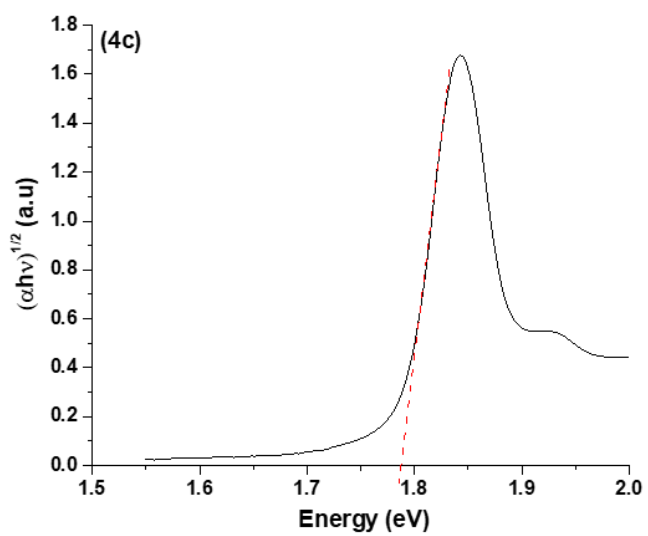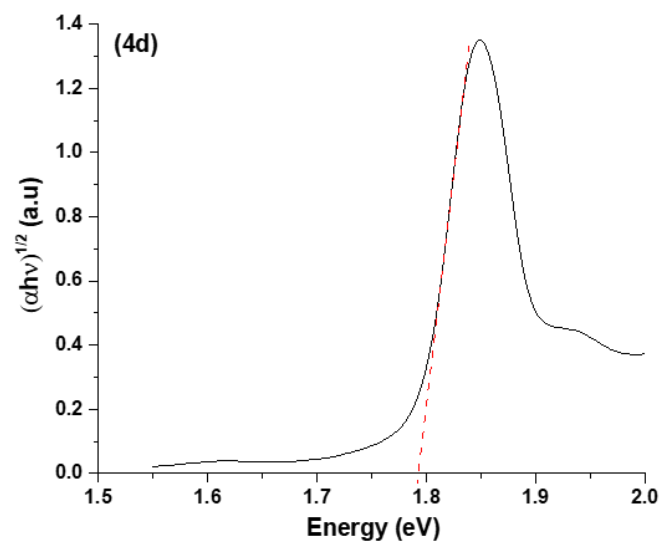

Figure S12. Tauc plots of NiPc complexes (4a-4d).

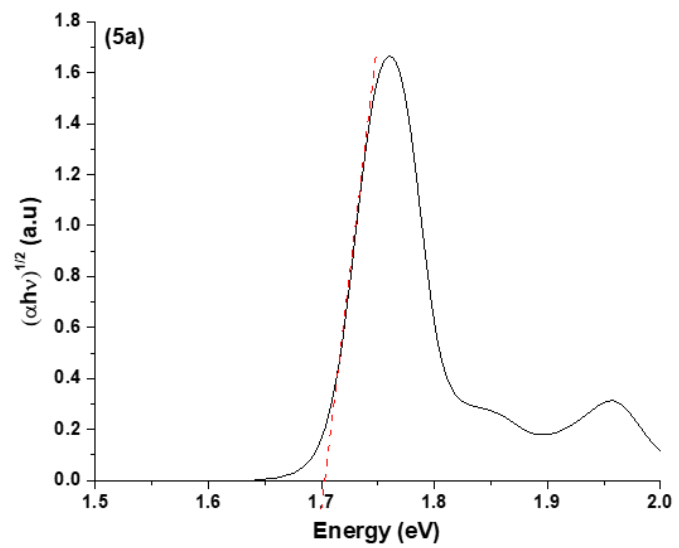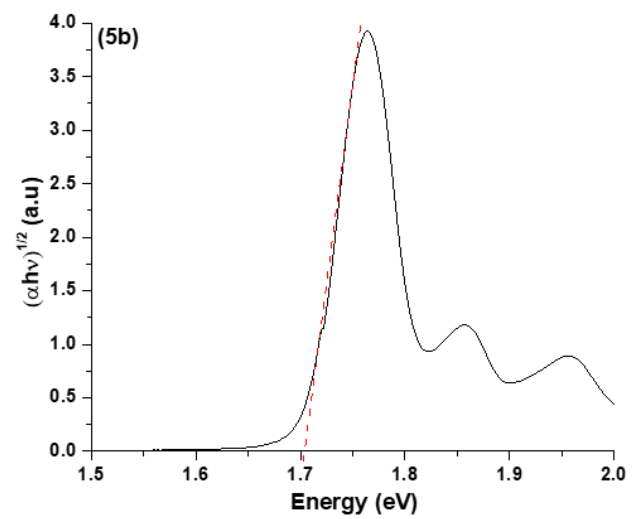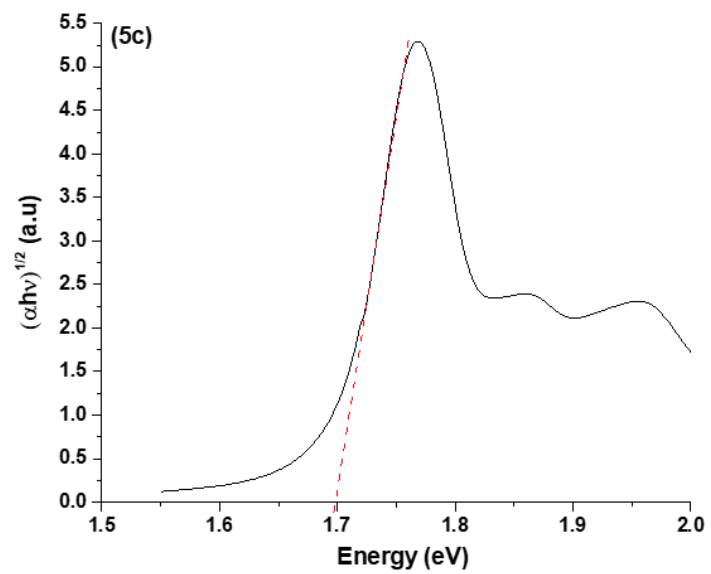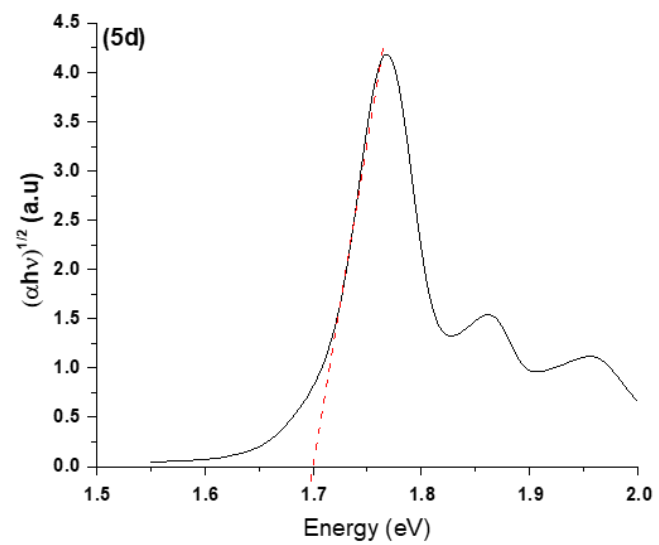

Figure S13. Tauc plots of TiPc complexes (5a-5d).

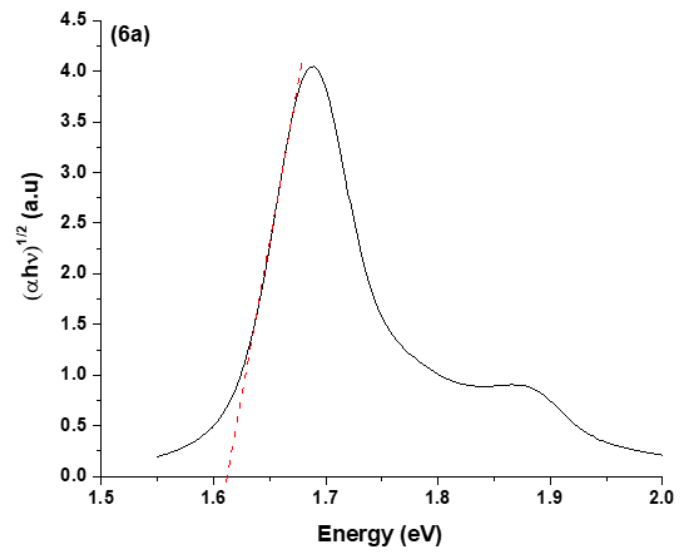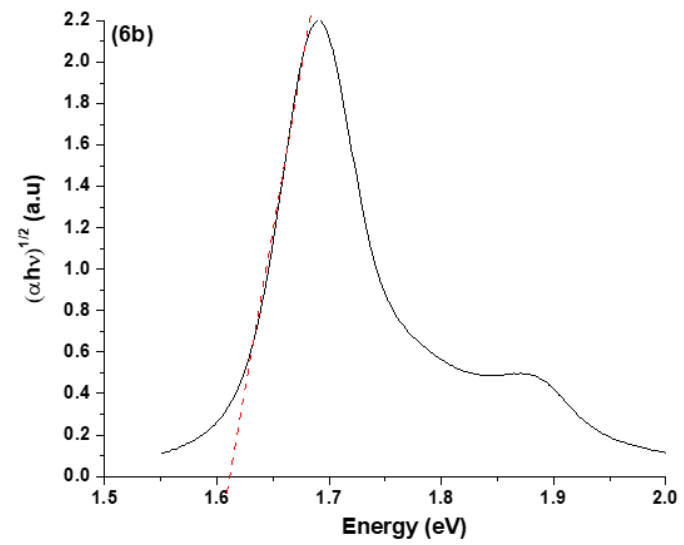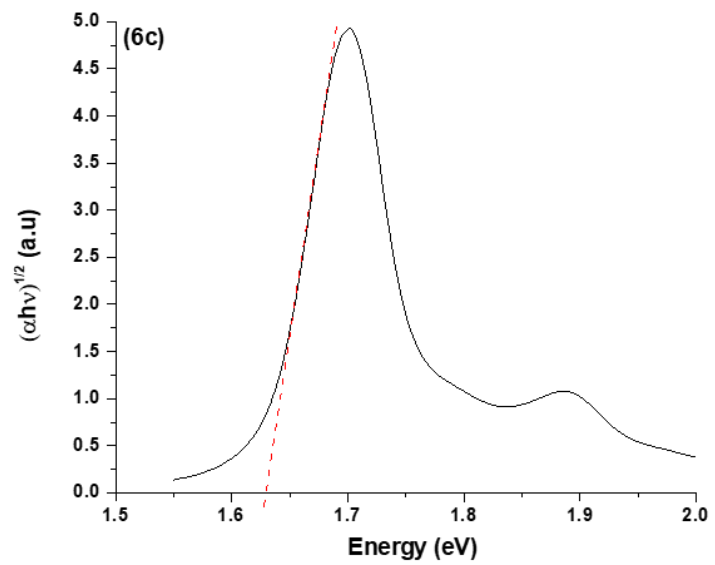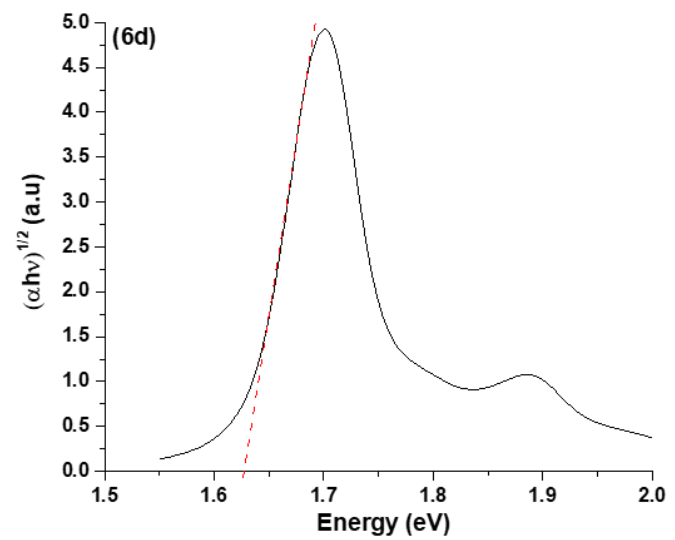

Figure S14. Tauc plots of MnPc complexes (6a-6d).

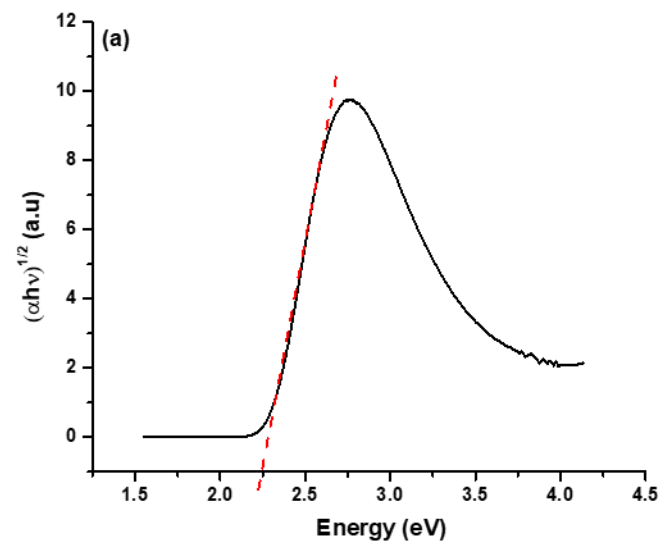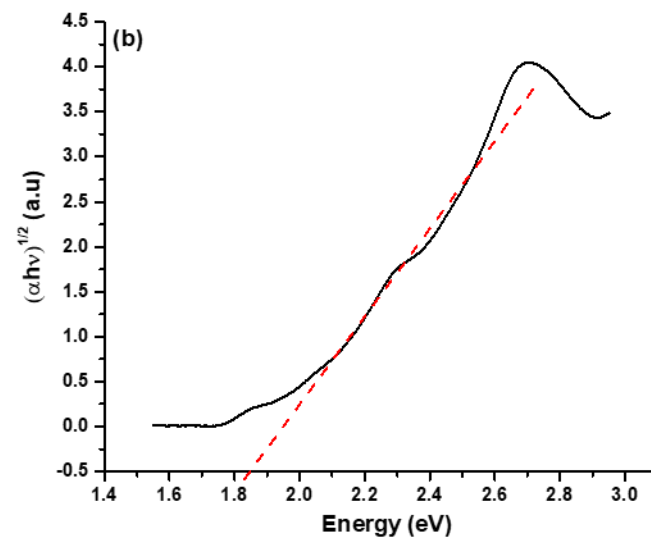

Figure S15. Tauc plots of (a) P3HT and (b) PC<sub>70</sub>BM .

## **(f) HOMO energy level - Photoelectron spectroscopy in air (PESA)**

PESA was used to determine the energy band structure of the MPCs. The light intensity for the PESA measurements was optimised at 15 nW for the complexes to prevent saturation of the electron counter. The IPs or HOMO levels of the complexes were measured under ambient conditions and estimated by plotting the electron count rate ( $n_e$ ) against the photon energy (eV) and extrapolating to  $n_e = 0$ . These plots are shown in Figures S16-S19 for the MPCs and in Figure S20 for PC<sub>70</sub>BM and P3HT.



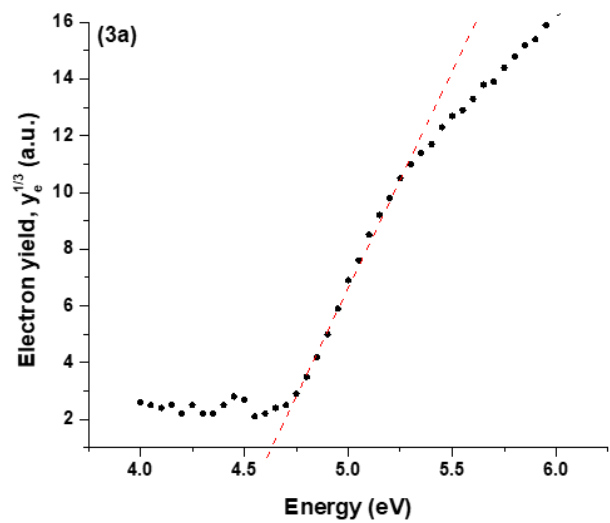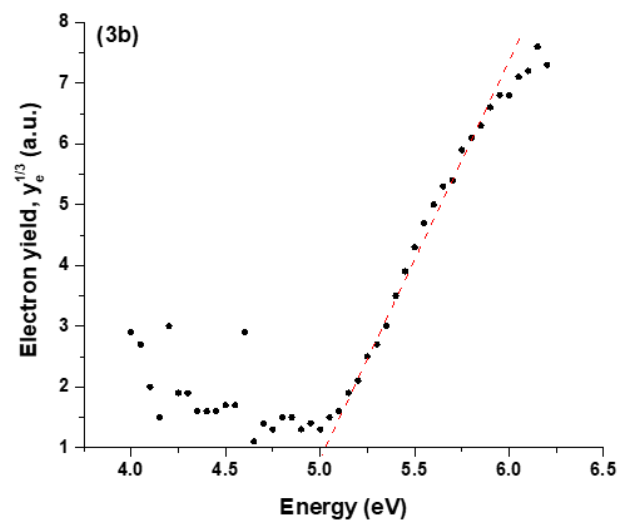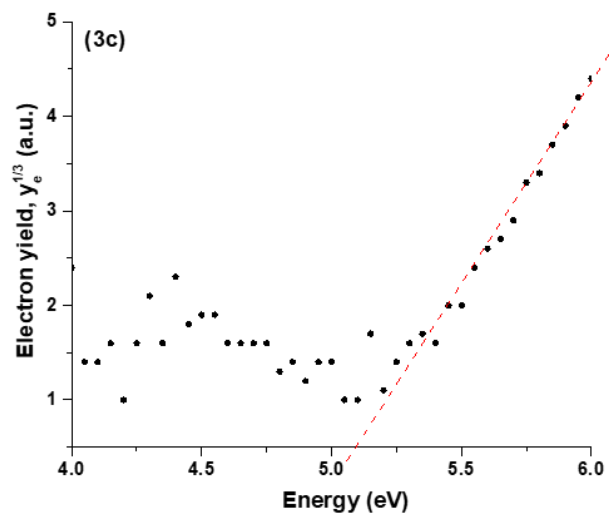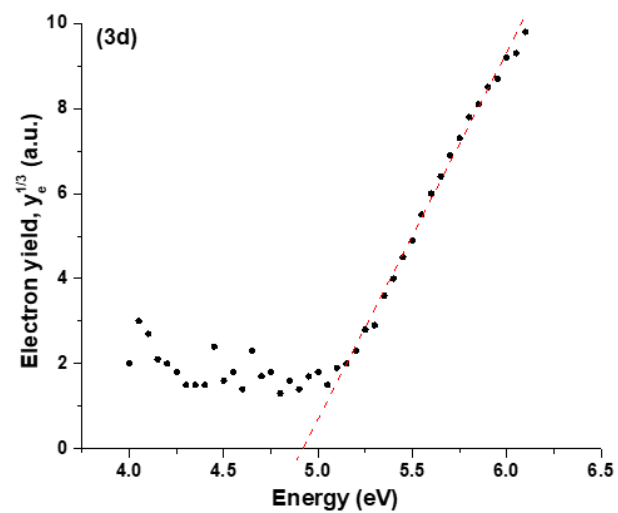

Figure S16. PESA plots of CoPc complexes (3a-3d).

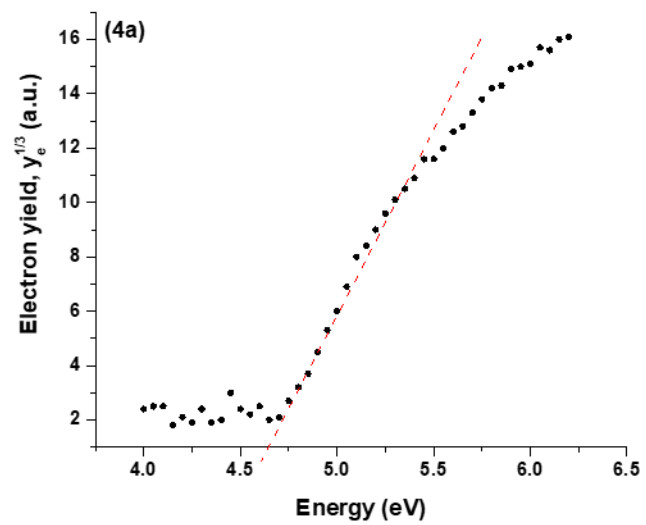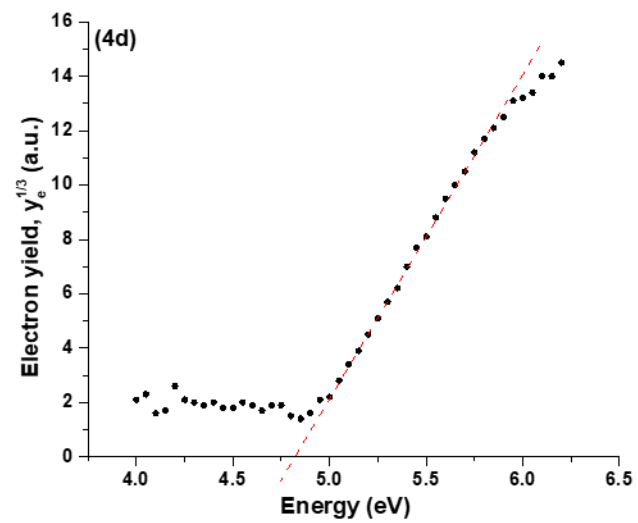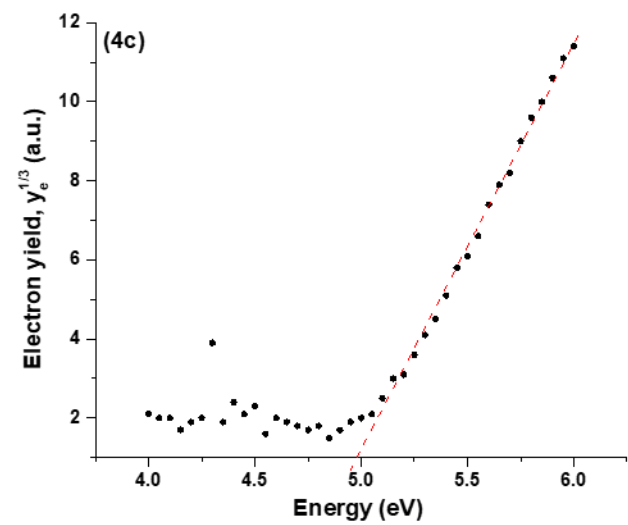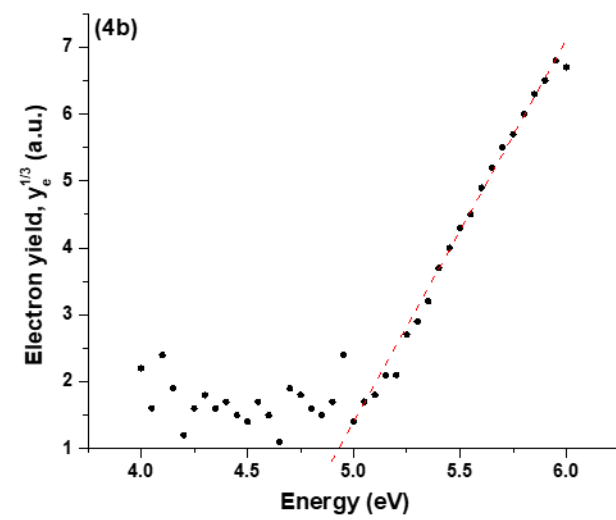

Figure S17. PESA plots of NiPc complexes (4a-4d).

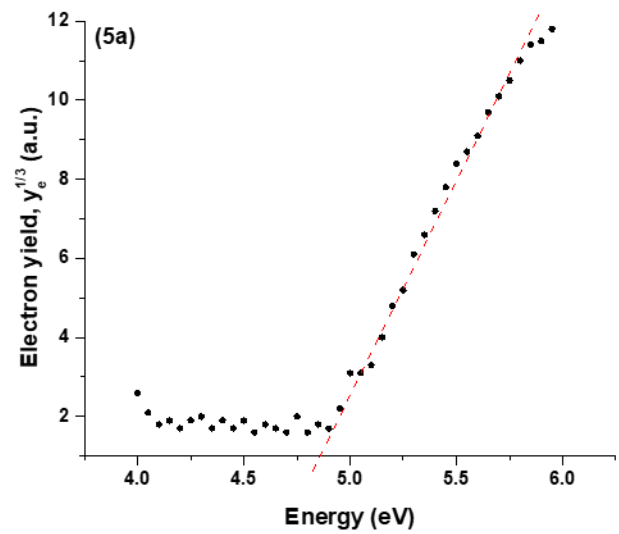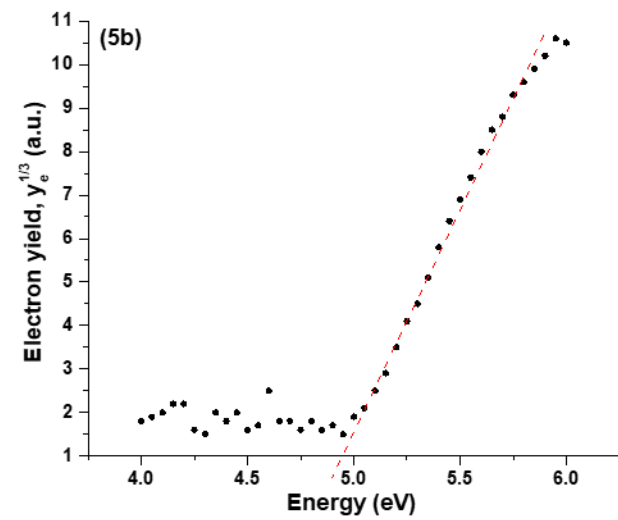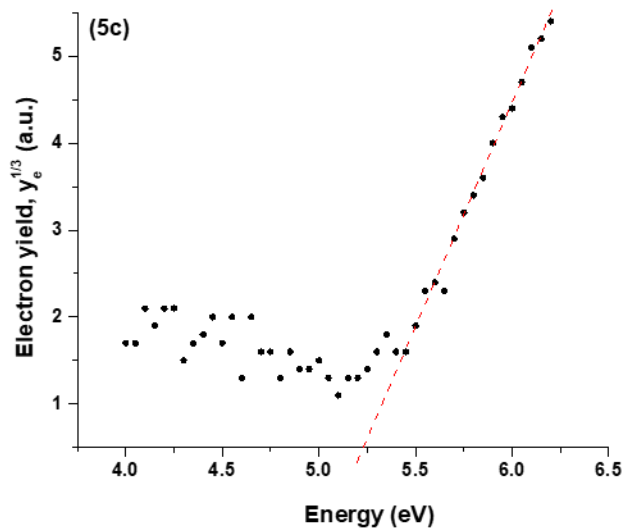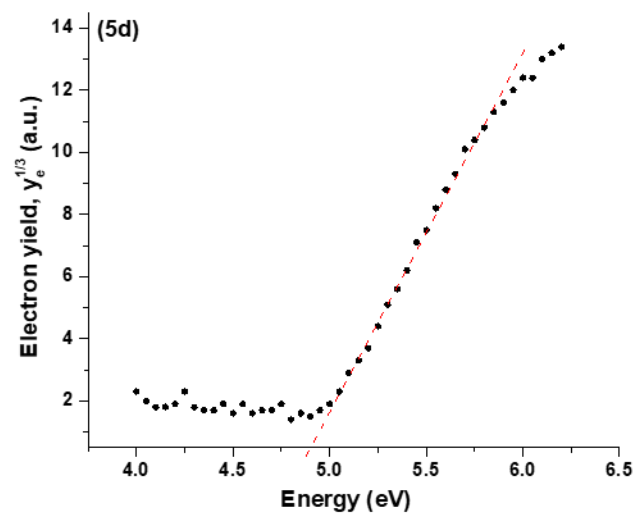

Figure S18. PESA plots of TiPc complexes (5a-5d).

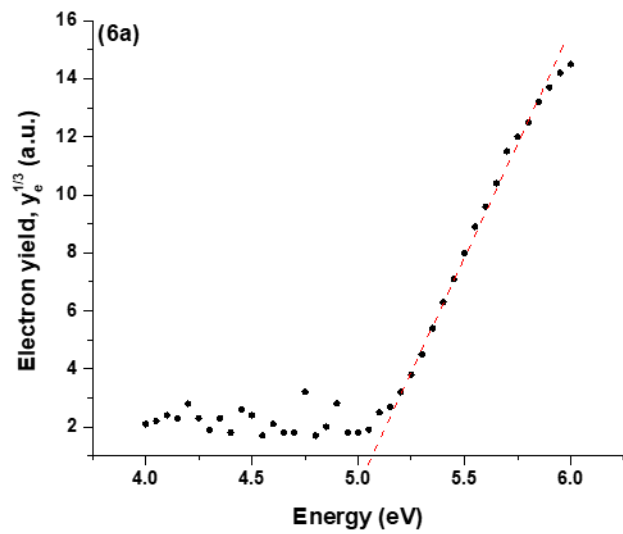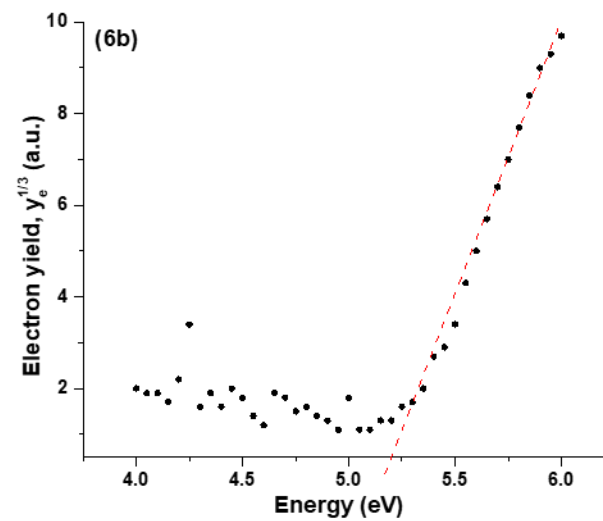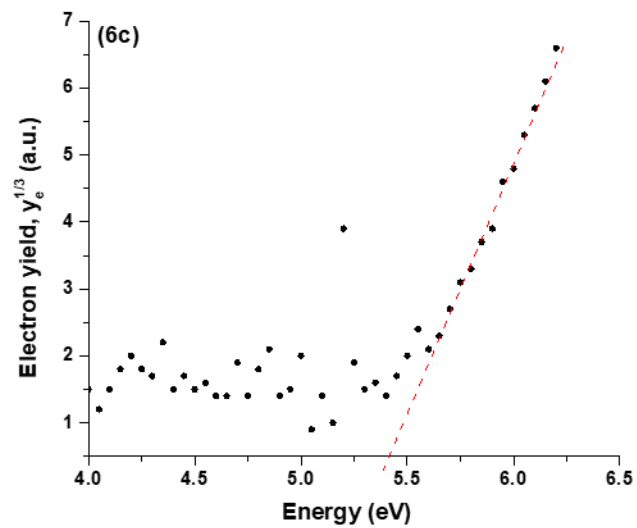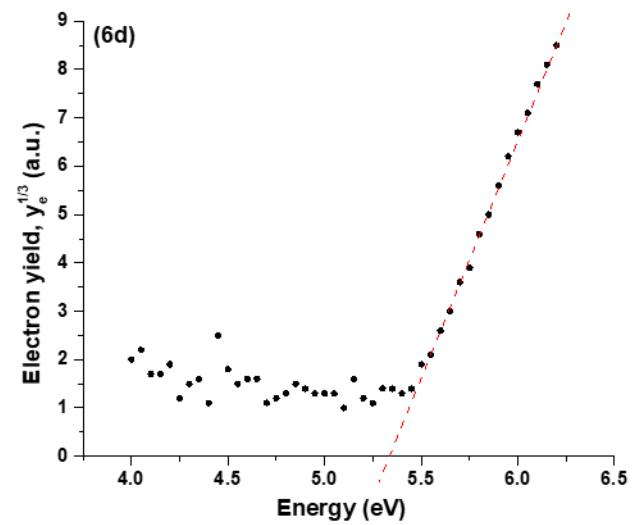

Figure S19. PESA plots of MnPc complexes (6a-6d).

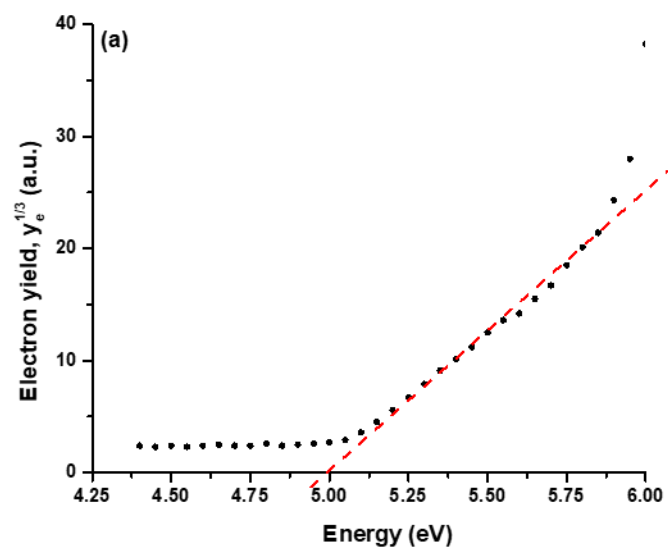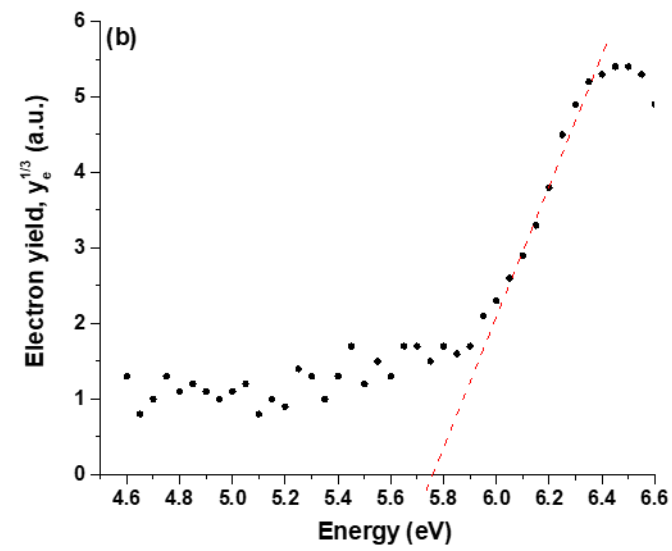

Figure S20. PESA plots of (a) P3HT and (b) PC<sub>70</sub>BM.

### (g) DFT Study – Optimised cartesian coordinates

Density functional theory, a computational modelling method was used to investigate the electronic structure of the frontier molecular orbitals of the MPc, i.e. the theoretical HOMO and LUMO values. In this study, B3LYP hybrid DFT functional was coupled with the 6-31+G(d) basis set to calculate the associated energy levels of the modelled MPc complexes. The geometries of all 16 MPcs were optimised prior to extracting HOMO and LUMO information.

Table S4. Optimised cartesian coordinates for MPcs **3a**, **4a**, **5a** and **6a**.

| 3a |          |          |          | 4a |          |          |          | 5a |          |          |          | 6a |          |          |          |
|----|----------|----------|----------|----|----------|----------|----------|----|----------|----------|----------|----|----------|----------|----------|
| C  | -3.6328  | -2.16701 | -0.41138 | C  | -3.59876 | -2.15477 | -0.3784  | C  | -3.53139 | -2.23946 | 0.01244  | C  | -3.53139 | -2.23946 | 0.01244  |
| C  | -4.14681 | -0.86278 | -0.32497 | C  | -4.11338 | -0.8533  | -0.28673 | C  | -4.07228 | -1.02122 | 0.20533  | C  | -4.07228 | -1.02122 | 0.20533  |
| C  | -5.5213  | -0.64083 | -0.27428 | C  | -5.49094 | -0.63161 | -0.22898 | C  | -5.44771 | -0.81541 | 0.18408  | C  | -5.44771 | -0.81541 | 0.18408  |
| C  | -6.37156 | -1.7455  | -0.30951 | C  | -6.3358  | -1.73577 | -0.26273 | C  | -6.26609 | -1.94043 | -0.09045 | C  | -6.26609 | -1.94043 | -0.09045 |
| C  | -5.84404 | -3.04958 | -0.38589 | C  | -5.80588 | -3.04289 | -0.34434 | C  | -5.67117 | -3.21553 | -0.32622 | C  | -5.67117 | -3.21553 | -0.32622 |
| C  | -4.46543 | -3.27929 | -0.43991 | C  | -4.43113 | -3.27148 | -0.40467 | C  | -4.28134 | -3.36554 | -0.25289 | C  | -4.28134 | -3.36554 | -0.25289 |
| C  | -2.17278 | -2.01351 | -0.44934 | C  | -2.1506  | -2.0176  | -0.4258  | C  | -2.02459 | -2.09701 | 0.13358  | C  | -2.02459 | -2.09701 | 0.13358  |
| C  | -2.98191 | 0.02264  | -0.31451 | C  | -2.97061 | 0.04091  | -0.28054 | C  | -2.89818 | -0.05297 | 0.41162  | C  | -2.89818 | -0.05297 | 0.41162  |
| H  | -7.44733 | -1.60986 | -0.28396 | H  | -7.41178 | -1.60328 | -0.23284 | H  | -7.32889 | -1.83001 | -0.12109 | H  | -7.32889 | -1.83001 | -0.12109 |
| H  | -4.08055 | -4.29104 | -0.50504 | H  | -4.04292 | -4.28142 | -0.4741  | H  | -3.81757 | -4.31802 | -0.40136 | H  | -3.81757 | -4.31802 | -0.40136 |
| N  | -1.82248 | -0.69601 | -0.39052 | N  | -1.79924 | -0.68517 | -0.36735 | N  | -1.74422 | -0.79094 | 0.40626  | N  | -1.74422 | -0.79094 | 0.40626  |
| N  | -1.36513 | -3.07396 | -0.5316  | N  | -1.34652 | -3.06126 | -0.51586 | N  | -1.21688 | -3.09484 | -0.00858 | N  | -1.21688 | -3.09484 | -0.00858 |
| N  | -3.11507 | 1.35059  | -0.23851 | N  | -3.09886 | 1.35348  | -0.20349 | N  | -3.02265 | 1.24673  | 0.53433  | N  | -3.02265 | 1.24673  | 0.53433  |
| C  | -2.09959 | 2.18953  | -0.22948 | C  | -2.05267 | 2.15886  | -0.19831 | C  | -2.02672 | 2.0938   | 0.42362  | C  | -2.02672 | 2.0938   | 0.42362  |
| C  | -2.20067 | 3.63798  | -0.14946 | C  | -2.18583 | 3.60577  | -0.11741 | C  | -2.17627 | 3.62384  | 0.25715  | C  | -2.17627 | 3.62384  | 0.25715  |
| C  | -0.88746 | 4.15686  | -0.17075 | C  | -0.88328 | 4.12115  | -0.13812 | C  | -0.9231  | 4.10503  | 0.0842   | C  | -0.9231  | 4.10503  | 0.0842   |
| C  | -3.31994 | 4.46818  | -0.05963 | C  | -3.30885 | 4.42904  | -0.02832 | C  | -3.29642 | 4.47354  | 0.26419  | C  | -3.29642 | 4.47354  | 0.26419  |
| C  | 0.02878  | 3.03835  | -0.26357 | C  | 0.00932  | 2.98191  | -0.22997 | C  | 0.0376   | 2.9316   | 0.20322  | C  | 0.0376   | 2.9316   | 0.20322  |
| C  | -0.6709  | 5.53811  | -0.10286 | C  | -0.66037 | 5.49992  | -0.07137 | C  | -0.64962 | 5.44229  | -0.15021 | C  | -0.64962 | 5.44229  | -0.15021 |
| C  | -3.08742 | 5.84133  | 0.00139  | C  | -3.07663 | 5.80377  | 0.03158  | C  | -3.04549 | 5.8686   | 0.10171  | C  | -3.04549 | 5.8686   | 0.10171  |
| H  | -4.32071 | 4.05455  | -0.03558 | H  | -4.3093  | 4.01449  | -0.00355 | H  | -4.28966 | 4.09129  | 0.39122  | H  | -4.28966 | 4.09129  | 0.39122  |
| C  | -1.77522 | 6.37077  | -0.01905 | C  | -1.76633 | 6.33389  | 0.01109  | C  | -1.72984 | 6.33467  | -0.13946 | C  | -1.72984 | 6.33467  | -0.13946 |
| H  | -1.6642  | 7.44898  | 0.03428  | H  | -1.65564 | 7.41225  | 0.06364  | H  | -1.56152 | 7.37747  | -0.30875 | H  | -1.56152 | 7.37747  | -0.30875 |
| N  | -0.75313 | 1.9028   | -0.29374 | N  | -0.71951 | 1.80865  | -0.26436 | N  | -0.6855  | 1.80801  | 0.42056  | N  | -0.6855  | 1.80801  | 0.42056  |

|   |          |          |          |   |          |          |          |   |          |          |          |   |          |          |          |
|---|----------|----------|----------|---|----------|----------|----------|---|----------|----------|----------|---|----------|----------|----------|
| C | -0.04975 | -2.99148 | -0.5736  | C | -0.03275 | -2.93082 | -0.56075 | C | 0.04853  | -2.95997 | -0.13968 | C | 0.04853  | -2.95997 | -0.13968 |
| C | 0.86644  | -4.11008 | -0.66564 | C | 0.85986  | -4.06899 | -0.66703 | C | 0.98688  | -4.06568 | -0.57714 | C | 0.98688  | -4.06568 | -0.57714 |
| C | 2.17968  | -3.59128 | -0.68713 | C | 2.16228  | -3.55336 | -0.68835 | C | 2.22575  | -3.52214 | -0.70438 | C | 2.22575  | -3.52214 | -0.70438 |
| C | 0.64972  | -5.4913  | -0.73392 | C | 0.63663  | -5.44701 | -0.74706 | C | 0.71226  | -5.39772 | -0.83522 | C | 0.71226  | -5.39772 | -0.83522 |
| C | 2.0786   | -2.14278 | -0.60808 | C | 2.02903  | -2.1073  | -0.59301 | C | 2.13137  | -2.02592 | -0.30804 | C | 2.13137  | -2.02592 | -0.30804 |
| C | 3.29887  | -4.42158 | -0.77741 | C | 3.28502  | -4.37561 | -0.79131 | C | 3.31682  | -4.2823  | -1.1374  | C | 3.31682  | -4.2823  | -1.1374  |
| C | 1.75391  | -6.32403 | -0.81804 | C | 1.74226  | -6.27999 | -0.84334 | C | 1.77626  | -6.19759 | -1.28103 | C | 1.77626  | -6.19759 | -1.28103 |
| C | 3.06617  | -5.79467 | -0.83868 | C | 3.0525   | -5.74961 | -0.86479 | C | 3.07168  | -5.64623 | -1.44545 | C | 3.07168  | -5.64623 | -1.44545 |
| H | 4.29966  | -4.00802 | -0.80217 | H | 4.28533  | -3.96076 | -0.81667 | H | 4.29168  | -3.85132 | -1.23476 | H | 4.29168  | -3.85132 | -1.23476 |
| N | 0.73214  | -1.85602 | -0.5432  | N | 0.69663  | -1.75763 | -0.51764 | N | 0.8483   | -1.74543 | 0.0596   | N | 0.8483   | -1.74543 | 0.0596   |
| N | 1.34407  | 3.12095  | -0.30779 | N | 1.32327  | 3.11236  | -0.27061 | N | 1.31424  | 3.0566   | 0.12866  | N | 1.31424  | 3.0566   | 0.12866  |
| N | 3.09384  | -1.30361 | -0.60203 | N | 3.0752   | -1.30217 | -0.58465 | N | 3.12679  | -1.22171 | -0.3286  | N | 3.12679  | -1.22171 | -0.3286  |
| C | 2.96046  | 0.02445  | -0.52819 | C | 2.94674  | 0.00985  | -0.50413 | C | 2.99745  | 0.04164  | -0.15354 | C | 2.99745  | 0.04164  | -0.15354 |
| C | 4.12505  | 0.91027  | -0.52815 | C | 4.08931  | 0.90424  | -0.50115 | C | 4.14998  | 1.0437   | -0.32649 | C | 4.14998  | 1.0437   | -0.32649 |
| C | 3.61134  | 2.21456  | -0.44172 | C | 3.57523  | 2.20567  | -0.40943 | C | 3.60947  | 2.26349  | -0.20155 | C | 3.60947  | 2.26349  | -0.20155 |
| C | 5.4989   | 0.68837  | -0.59637 | C | 5.4663   | 0.68229  | -0.57338 | C | 5.50883  | 0.86137  | -0.57382 | C | 5.50883  | 0.86137  | -0.57382 |
| C | 2.15169  | 2.06066  | -0.39262 | C | 2.12716  | 2.06898  | -0.358   | C | 2.13239  | 2.07187  | 0.07438  | C | 2.13239  | 2.07187  | 0.07438  |
| C | 4.44462  | 3.32664  | -0.41136 | C | 4.40862  | 3.3219   | -0.37638 | C | 4.33565  | 3.43017  | -0.33077 | C | 4.33565  | 3.43017  | -0.33077 |
| C | 6.34884  | 1.79339  | -0.57421 | C | 6.31116  | 1.78643  | -0.54834 | C | 6.3057   | 2.02837  | -0.7116  | C | 6.3057   | 2.02837  | -0.7116  |
| C | 5.8224   | 3.09662  | -0.477   | C | 5.78263  | 3.09266  | -0.44538 | C | 5.7053   | 3.3178   | -0.60415 | C | 5.7053   | 3.3178   | -0.60415 |
| H | 7.42346  | 1.66     | -0.6369  | H | 7.38597  | 1.65611  | -0.61335 | H | 7.3546   | 1.93958  | -0.89865 | H | 7.3546   | 1.93958  | -0.89865 |
| N | 1.80137  | 0.74289  | -0.44622 | N | 1.77503  | 0.73597  | -0.41489 | N | 1.8706   | 0.74116  | 0.19505  | N | 1.8706   | 0.74116  | 0.19505  |
| H | 4.06021  | 4.33838  | -0.34307 | H | 4.02099  | 4.33182  | -0.30364 | H | 3.86929  | 4.38657  | -0.22786 | H | 3.86929  | 4.38657  | -0.22786 |
| H | -0.3581  | -5.89346 | -0.71867 | H | -0.37111 | -5.84961 | -0.73157 | H | -0.27289 | -5.79941 | -0.70182 | H | -0.27289 | -5.79941 | -0.70182 |
| H | -5.92052 | 0.36724  | -0.2181  | H | -5.8893  | 0.37636  | -0.16965 | H | -5.87036 | 0.15113  | 0.36388  | H | -5.87036 | 0.15113  | 0.36388  |
| H | 0.33685  | 5.94043  | -0.11865 | H | 0.34744  | 5.9024   | -0.08668 | H | 0.34824  | 5.78215  | -0.3271  | H | 0.34824  | 5.78215  | -0.3271  |
| H | 5.89676  | -0.31883 | -0.67378 | H | 5.86295  | -0.32474 | -0.65555 | H | 5.93315  | -0.11679 | -0.65647 | H | 5.93315  | -0.11679 | -0.65647 |
| C | -5.40738 | 6.43818  | -0.11033 | C | -5.39534 | 6.40266  | -0.09856 | C | -5.38692 | 6.42927  | -0.15782 | C | -5.38692 | 6.42927  | -0.15782 |
| C | -6.31645 | 6.55875  | 0.93392  | C | -6.32382 | 6.53908  | 0.92683  | C | -6.46182 | 6.95492  | 0.56982  | C | -6.46182 | 6.95492  | 0.56982  |
| C | -5.84477 | 6.07053  | -1.38418 | C | -5.81179 | 6.0215   | -1.37581 | C | -5.61763 | 5.51704  | -1.19301 | C | -5.61763 | 5.51704  | -1.19301 |
| C | -7.67168 | 6.30788  | 0.703    | C | -7.67571 | 6.29076  | 0.67387  | C | -7.76969 | 6.58053  | 0.26157  | C | -7.76969 | 6.58053  | 0.26157  |
| H | -5.96126 | 6.85404  | 1.91634  | H | -5.98547 | 6.8443   | 1.91217  | H | -6.27762 | 7.6475   | 1.36706  | H | -6.27762 | 7.6475   | 1.36706  |
| C | -7.19732 | 5.8173   | -1.59319 | C | -7.16094 | 5.77072  | -1.6068  | C | -6.93637 | 5.14564  | -1.50963 | C | -6.93637 | 5.14564  | -1.50963 |
| H | -5.13144 | 5.98961  | -2.1987  | H | -5.08398 | 5.92746  | -2.17598 | H | -4.79547 | 5.10827  | -1.74222 | H | -4.79547 | 5.10827  | -1.74222 |

|   |          |          |          |   |          |          |          |   |          |          |          |   |          |          |          |
|---|----------|----------|----------|---|----------|----------|----------|---|----------|----------|----------|---|----------|----------|----------|
| C | -8.14549 | 5.92833  | -0.55981 | C | -8.12774 | 5.89764  | -0.59287 | C | -8.01195 | 5.68164  | -0.77822 | C | -8.01195 | 5.68164  | -0.77822 |
| H | -8.35802 | 6.41246  | 1.53566  | H | -8.3768  | 6.40788  | 1.49254  | H | -8.58992 | 6.98145  | 0.82317  | H | -8.58992 | 6.98145  | 0.82317  |
| H | -7.51742 | 5.53299  | -2.59151 | H | -7.46346 | 5.47545  | -2.60751 | H | -7.12155 | 4.45708  | -2.30731 | H | -7.12155 | 4.45708  | -2.30731 |
| O | -4.08131 | 6.78094  | 0.12414  | O | -4.07394 | 6.7425   | 0.1567   | O | -4.07443 | 6.86339  | 0.19077  | O | -4.07443 | 6.86339  | 0.19077  |
| C | -7.88089 | -4.22051 | 0.13229  | C | -7.84321 | -4.21154 | 0.17806  | C | -7.7234  | -4.34566 | -0.00252 | C | -7.7234  | -4.34566 | -0.00252 |
| C | -8.07977 | -3.81262 | 1.45032  | C | -8.03727 | -3.80798 | 1.49799  | C | -7.91149 | -3.62889 | 1.18592  | C | -7.91149 | -3.62889 | 1.18592  |
| C | -8.93087 | -4.79674 | -0.58359 | C | -8.89571 | -4.78378 | -0.53711 | C | -8.7855  | -5.05853 | -0.56986 | C | -8.7855  | -5.05853 | -0.56986 |
| C | -9.3362  | -3.97332 | 2.03893  | C | -9.29269 | -3.96844 | 2.08929  | C | -9.1629  | -3.64798 | 1.81984  | C | -9.1629  | -3.64798 | 1.81984  |
| H | -7.26135 | -3.37701 | 2.01472  | H | -7.2164  | -3.37638 | 2.06203  | H | -7.10243 | -3.07082 | 1.60881  | H | -7.10243 | -3.07082 | 1.60881  |
| C | -10.1727 | -4.95623 | 0.02414  | C | -10.136  | -4.94356 | 0.07335  | C | -10.0296 | -5.08542 | 0.0654   | C | -10.0296 | -5.08542 | 0.0654   |
| H | -8.75883 | -5.11674 | -1.60659 | H | -8.72679 | -5.10047 | -1.56166 | H | -8.64344 | -5.58595 | -1.48933 | H | -8.64344 | -5.58595 | -1.48933 |
| C | -10.4123 | -4.54653 | 1.34737  | C | -10.3715 | -4.5377  | 1.39846  | C | -10.2194 | -4.38609 | 1.2629   | C | -10.2194 | -4.38609 | 1.2629   |
| H | -9.45965 | -3.64645 | 3.06546  | H | -9.41315 | -3.64477 | 3.11716  | H | -9.31082 | -3.10221 | 2.72788  | H | -9.31082 | -3.10221 | 2.72788  |
| H | -10.9731 | -5.40836 | -0.55495 | H | -10.9384 | -5.39262 | -0.5051  | H | -10.8379 | -5.64173 | -0.36497 | H | -10.8379 | -5.64173 | -0.36497 |
| O | -6.64751 | -4.16492 | -0.49253 | O | -6.61193 | -4.15516 | -0.45177 | O | -6.45085 | -4.36782 | -0.64436 | O | -6.45085 | -4.36782 | -0.64436 |
| C | 7.8863   | 4.21057  | 0.04676  | C | 7.84867  | 4.19905  | 0.08328  | C | 7.75516  | 4.40932  | -0.18513 | C | 7.75516  | 4.40932  | -0.18513 |
| C | 8.14013  | 3.6841   | 1.31229  | C | 8.09704  | 3.67456  | 1.35048  | C | 7.97167  | 3.54254  | 0.89305  | C | 7.97167  | 3.54254  | 0.89305  |
| C | 8.90933  | 4.84054  | -0.66264 | C | 8.87582  | 4.82206  | -0.6262  | C | 8.80687  | 5.18223  | -0.69044 | C | 8.80687  | 5.18223  | -0.69044 |
| C | 9.42348  | 3.78213  | 1.85439  | C | 9.3801   | 3.76758  | 1.8946   | C | 9.23953  | 3.47268  | 1.48532  | C | 9.23953  | 3.47268  | 1.48532  |
| H | 7.34318  | 3.20493  | 1.8721   | H | 7.29641  | 3.20152  | 1.91038  | H | 7.17055  | 2.93722  | 1.26561  | H | 7.17055  | 2.93722  | 1.26561  |
| C | 10.17957 | 4.93488  | -0.10141 | C | 10.1454  | 4.91165  | -0.06294 | C | 10.07151 | 5.1173   | -0.09552 | C | 10.07151 | 5.1173   | -0.09552 |
| H | 8.69502  | 5.25211  | -1.64409 | H | 8.66518  | 5.23218  | -1.60905 | H | 8.64158  | 5.82506  | -1.52994 | H | 8.64158  | 5.82506  | -1.52994 |
| C | 10.47403 | 4.40641  | 1.16766  | C | 10.43486 | 4.38502  | 1.20804  | C | 10.28618 | 4.27076  | 0.99867  | C | 10.28618 | 4.27076  | 0.99867  |
| H | 9.58917  | 3.364    | 2.84111  | H | 9.54209  | 3.35134  | 2.8827   | H | 9.408    | 2.81272  | 2.31019  | H | 9.408    | 2.81272  | 2.31019  |
| H | 10.9581  | 5.43     | -0.67523 | H | 10.92741 | 5.40153  | -0.63647 | H | 10.87399 | 5.71434  | -0.4753  | H | 10.87399 | 5.71434  | -0.4753  |
| O | 6.62458  | 4.21756  | -0.52171 | O | 6.58775  | 4.21043  | -0.48819 | O | 6.46088  | 4.52015  | -0.76896 | O | 6.46088  | 4.52015  | -0.76896 |
| C | -11.8069 | -4.73566 | 1.97093  | C | -11.765  | -4.72677 | 2.0243   | C | -11.5912 | -4.43295 | 1.95907  | C | -11.5912 | -4.43295 | 1.95907  |
| C | -12.1805 | -6.23708 | 1.9583   | C | -12.138  | -6.22836 | 2.0134   | C | -12.2641 | -5.79119 | 1.67401  | C | -12.2641 | -5.79119 | 1.67401  |
| H | -13.1766 | -6.38691 | 2.39262  | H | -13.1332 | -6.37824 | 2.44979  | H | -13.2189 | -5.82625 | 2.15641  | H | -13.2189 | -5.82625 | 2.15641  |
| H | -12.1968 | -6.6456  | 0.94233  | H | -12.1562 | -6.63753 | 0.99771  | H | -12.3934 | -5.91142 | 0.6188   | H | -12.3934 | -5.91142 | 0.6188   |
| H | -11.4628 | -6.8242  | 2.54255  | H | -11.419  | -6.81485 | 2.59661  | H | -11.6462 | -6.58062 | 2.05008  | H | -11.6462 | -6.58062 | 2.05008  |
| C | -12.8505 | -3.94228 | 1.14882  | C | -12.8101 | -3.93435 | 1.20303  | C | -12.4756 | -3.29347 | 1.41866  | C | -12.4756 | -3.29347 | 1.41866  |
| H | -13.8527 | -4.07198 | 1.5756   | H | -13.8115 | -4.06396 | 1.63152  | H | -13.4313 | -3.3226  | 1.89932  | H | -13.4313 | -3.3226  | 1.89932  |
| H | -12.617  | -2.87139 | 1.14885  | H | -12.5769 | -2.8634  | 1.20178  | H | -12.0054 | -2.35257 | 1.61715  | H | -12.0054 | -2.35257 | 1.61715  |



|   |          |          |          |   |          |          |          |   |          |          |          |   |          |          |          |
|---|----------|----------|----------|---|----------|----------|----------|---|----------|----------|----------|---|----------|----------|----------|
| H | -12.8868 | -4.27572 | 0.10633  | H | -12.8481 | -4.26875 | 0.16088  | H | -12.604  | -3.41222 | 0.36286  | H | -12.604  | -3.41222 | 0.36286  |
| C | -11.8685 | -4.24029 | 3.42848  | C | -11.8245 | -4.23011 | 3.48147  | C | -11.4049 | -4.26213 | 3.47872  | C | -11.4049 | -4.26213 | 3.47872  |
| H | -11.1684 | -4.78284 | 4.07398  | H | -11.1225 | -4.77122 | 4.12618  | H | -10.7887 | -5.05181 | 3.85449  | H | -10.7887 | -5.05181 | 3.85449  |
| H | -11.6469 | -3.16965 | 3.50652  | H | -11.6041 | -3.15909 | 3.55805  | H | -10.937  | -3.31982 | 3.67678  | H | -10.937  | -3.31982 | 3.67678  |
| H | -12.8761 | -4.39775 | 3.8292   | H | -12.8311 | -4.38844 | 3.88422  | H | -12.3597 | -4.29411 | 3.96173  | H | -12.3597 | -4.29411 | 3.96173  |
| C | -9.63047 | 5.64014  | -0.84603 | C | -9.60792 | 5.61025  | -0.90343 | C | -9.47076 | 5.30339  | -1.09633 | C | -9.47076 | 5.30339  | -1.09633 |
| C | -9.78558 | 4.18516  | -1.3492  | C | -9.75781 | 4.1508   | -1.39503 | C | -9.53234 | 3.87112  | -1.6618  | C | -9.53234 | 3.87112  | -1.6618  |
| H | -10.8386 | 3.96671  | -1.56464 | H | -10.8073 | 3.93265  | -1.62767 | H | -10.5499 | 3.61558  | -1.876   | H | -10.5499 | 3.61558  | -1.876   |
| H | -9.21476 | 4.00667  | -2.26664 | H | -9.1705  | 3.96189  | -2.29989 | H | -8.95458 | 3.81405  | -2.56083 | H | -8.95458 | 3.81405  | -2.56083 |
| H | -9.43738 | 3.47018  | -0.59502 | H | -9.42526 | 3.44265  | -0.62742 | H | -9.13728 | 3.18581  | -0.9403  | H | -9.13728 | 3.18581  | -0.9403  |
| C | -10.1452 | 6.61506  | -1.93183 | C | -10.1005 | 6.57572  | -2.00782 | C | -10.0447 | 6.29517  | -2.13262 | C | -10.0447 | 6.29517  | -2.13262 |
| H | -11.2028 | 6.42091  | -2.14796 | H | -11.154  | 6.38068  | -2.2431  | H | -11.0612 | 6.03952  | -2.3478  | H | -11.0612 | 6.03952  | -2.3478  |
| H | -10.051  | 7.65548  | -1.60058 | H | -10.0117 | 7.61899  | -1.68412 | H | -10.0032 | 7.28927  | -1.73804 | H | -10.0032 | 7.28927  | -1.73804 |
| H | -9.58991 | 6.51167  | -2.86996 | H | -9.52694 | 6.4636   | -2.93387 | H | -9.46754 | 6.24524  | -3.03337 | H | -9.46754 | 6.24524  | -3.03337 |
| C | -10.5106 | 5.81059  | 0.40675  | C | -10.5102 | 5.79499  | 0.3314   | C | -10.3009 | 5.37459  | 0.20094  | C | -10.3009 | 5.37459  | 0.20094  |
| H | -10.2145 | 5.12618  | 1.20996  | H | -10.2295 | 5.11853  | 1.1468   | H | -9.90288 | 4.68448  | 0.91581  | H | -9.90288 | 4.68448  | 0.91581  |
| H | -10.4721 | 6.83409  | 0.79686  | H | -10.4766 | 6.82242  | 0.7114   | H | -10.2567 | 6.36667  | 0.59985  | H | -10.2567 | 6.36667  | 0.59985  |
| H | -11.5548 | 5.59272  | 0.15622  | H | -11.5501 | 5.57624  | 0.06436  | H | -11.3189 | 5.12104  | -0.01125 | H | -11.3189 | 5.12104  | -0.01125 |
| C | 11.89741 | 4.52752  | 1.74133  | C | 11.8578  | 4.50112  | 1.78391  | C | 11.67277 | 4.21817  | 1.66746  | C | 11.67277 | 4.21817  | 1.66746  |
| C | 12.28814 | 6.02113  | 1.84557  | C | 12.25647 | 5.9931   | 1.88177  | C | 12.35441 | 5.59627  | 1.53813  | C | 12.35441 | 5.59627  | 1.53813  |
| H | 13.30431 | 6.12371  | 2.24581  | H | 13.27213 | 6.09192  | 2.28416  | H | 13.31825 | 5.56526  | 2.00209  | H | 13.31825 | 5.56526  | 2.00209  |
| H | 12.26388 | 6.51852  | 0.87027  | H | 12.23765 | 6.48588  | 0.904    | H | 12.46514 | 5.84406  | 0.50297  | H | 12.46514 | 5.84406  | 0.50297  |
| H | 11.60399 | 6.55926  | 2.51149  | H | 11.57365 | 6.53831  | 2.54328  | H | 11.75115 | 6.33834  | 2.01963  | H | 11.75115 | 6.33834  | 2.01963  |
| C | 12.89316 | 3.80297  | 0.80452  | C | 12.85125 | 3.76647  | 0.85247  | C | 12.53431 | 3.14561  | 0.97462  | C | 12.53431 | 3.14561  | 0.97462  |
| H | 13.91555 | 3.88873  | 1.19277  | H | 13.87328 | 3.84818  | 1.24245  | H | 13.49884 | 3.10666  | 1.43626  | H | 13.49884 | 3.10666  | 1.43626  |
| H | 12.64883 | 2.7377   | 0.72181  | H | 12.60103 | 2.70224  | 0.77422  | H | 12.05678 | 2.19191  | 1.0656   | H | 12.05678 | 2.19191  | 1.0656   |
| H | 12.88407 | 4.22647  | -0.20537 | H | 12.8467  | 4.18537  | -0.15938 | H | 12.64468 | 3.39167  | -0.06104 | H | 12.64468 | 3.39167  | -0.06104 |
| C | 12.01807 | 3.90264  | 3.14418  | C | 11.97212 | 3.88237  | 3.18997  | C | 11.51112 | 3.86083  | 3.15763  | C | 11.51112 | 3.86083  | 3.15763  |
| H | 11.35728 | 4.3934   | 3.86787  | H | 11.31202 | 4.37982  | 3.90972  | H | 10.90975 | 4.60273  | 3.63957  | H | 10.90975 | 4.60273  | 3.63957  |
| H | 11.78267 | 2.83223  | 3.13586  | H | 11.73165 | 2.81306  | 3.18624  | H | 11.03655 | 2.90523  | 3.24493  | H | 11.03655 | 2.90523  | 3.24493  |
| H | 13.04557 | 4.01104  | 3.50915  | H | 12.99924 | 3.9876   | 3.55687  | H | 12.47391 | 3.82403  | 3.62382  | H | 12.47391 | 3.82403  | 3.62382  |
| O | 4.05985  | -6.73447 | -0.96161 | O | 4.04879  | -6.68758 | -1.00387 | O | 4.09999  | -6.5089  | -1.93464 | O | 4.09999  | -6.5089  | -1.93464 |
| C | 5.38643  | -6.39077 | -0.7314  | C | 5.37363  | -6.35035 | -0.76303 | C | 5.38298  | -6.16813 | -1.4214  | C | 5.38298  | -6.16813 | -1.4214  |
| C | 5.82798  | -6.02713 | 0.54215  | C | 5.80921  | -5.98121 | 0.51129  | C | 5.51389  | -5.51476 | -0.18864 | C | 5.51389  | -5.51476 | -0.18864 |

|    |          |          |          |    |          |          |          |    |          |          |          |    |          |          |          |
|----|----------|----------|----------|----|----------|----------|----------|----|----------|----------|----------|----|----------|----------|----------|
| C  | 6.29177  | -6.50631 | -1.77944 | C  | 6.28688  | -6.47803 | -1.80323 | C  | 6.51503  | -6.50094 | -2.16685 | C  | 6.51503  | -6.50094 | -2.16685 |
| C  | 7.18099  | -5.77309 | 0.74719  | C  | 7.16238  | -5.73429 | 0.72432  | C  | 6.79387  | -5.21543 | 0.30836  | C  | 6.79387  | -5.21543 | 0.30836  |
| H  | 5.11739  | -5.95015 | 1.35946  | H  | 5.09339  | -5.89375 | 1.32293  | H  | 4.63947  | -5.24962 | 0.37207  | H  | 4.63947  | -5.24962 | 0.37207  |
| C  | 7.64753  | -6.25462 | -1.55255 | C  | 7.64255  | -6.23382 | -1.56844 | C  | 7.78479  | -6.22892 | -1.66424 | C  | 7.78479  | -6.22892 | -1.66424 |
| H  | 5.93339  | -6.79836 | -2.76166 | H  | 5.93355  | -6.77384 | -2.78617 | H  | 6.40755  | -6.97167 | -3.1207  | H  | 6.40755  | -6.97167 | -3.1207  |
| C  | 8.12549  | -5.87929 | -0.29004 | C  | 8.11399  | -5.85324 | -0.3051  | C  | 7.92927  | -5.59362 | -0.42738 | C  | 7.92927  | -5.59362 | -0.42738 |
| H  | 7.5045   | -5.49215 | 1.74537  | H  | 7.48038  | -5.44867 | 1.72302  | H  | 6.9038   | -4.7031  | 1.24339  | H  | 6.9038   | -4.7031  | 1.24339  |
| H  | 8.33094  | -6.35516 | -2.38809 | H  | 8.33107  | -6.34425 | -2.39857 | H  | 8.64937  | -6.50627 | -2.22844 | H  | 8.64937  | -6.50627 | -2.22844 |
| C  | 9.61122  | -5.59072 | -0.0081  | C  | 9.59939  | -5.57127 | -0.01451 | C  | 9.34337  | -5.32538 | 0.10997  | C  | 9.34337  | -5.32538 | 0.10997  |
| C  | 9.76682  | -4.13719 | 0.49909  | C  | 9.75921  | -4.11661 | 0.48791  | C  | 9.35437  | -4.02667 | 0.93181  | C  | 9.35437  | -4.02667 | 0.93181  |
| H  | 9.4153   | -3.42013 | -0.25155 | H  | 9.41648  | -3.40108 | -0.26824 | H  | 9.05118  | -3.21023 | 0.31047  | H  | 9.05118  | -3.21023 | 0.31047  |
| H  | 9.19906  | -3.96226 | 1.41915  | H  | 9.18561  | -3.93531 | 1.40308  | H  | 8.67738  | -4.11983 | 1.75508  | H  | 8.67738  | -4.11983 | 1.75508  |
| H  | 10.82043 | -3.9185  | 0.71142  | H  | 10.81243 | -3.9023  | 0.70684  | H  | 10.34274 | -3.84589 | 1.30161  | H  | 10.34274 | -3.84589 | 1.30161  |
| C  | 10.13045 | -6.56858 | 1.07288  | C  | 10.1069  | -6.54694 | 1.07387  | C  | 9.77046  | -6.50249 | 1.0071   | C  | 9.77046  | -6.50249 | 1.0071   |
| H  | 10.03573 | -7.60804 | 0.73883  | H  | 10.00978 | -7.5872  | 0.74306  | H  | 9.75774  | -7.40911 | 0.43932  | H  | 9.75774  | -7.40911 | 0.43932  |
| H  | 11.18879 | -6.37444 | 1.28571  | H  | 11.1646  | -6.35669 | 1.29352  | H  | 10.75755 | -6.32968 | 1.3807   | H  | 10.75755 | -6.32968 | 1.3807   |
| H  | 9.57854  | -6.46838 | 2.01335  | H  | 9.54862  | -6.44068 | 2.00986  | H  | 9.08825  | -6.58664 | 1.82867  | H  | 9.08825  | -6.58664 | 1.82867  |
| C  | 10.48719 | -5.75651 | -1.26442 | C  | 10.48349 | -5.74641 | -1.26383 | C  | 10.32059 | -5.19166 | -1.07824 | C  | 10.32059 | -5.19166 | -1.07824 |
| H  | 10.44811 | -6.77878 | -1.65767 | H  | 10.44102 | -6.76976 | -1.65377 | H  | 10.31298 | -6.09722 | -1.65064 | H  | 10.31298 | -6.09722 | -1.65064 |
| H  | 10.18796 | -5.06976 | -2.06444 | H  | 10.1938  | -5.06084 | -2.06833 | H  | 10.01663 | -4.37552 | -1.69923 | H  | 10.01663 | -4.37552 | -1.69923 |
| H  | 11.53212 | -5.5387  | -1.01679 | H  | 11.52789 | -5.53379 | -1.00946 | H  | 11.30996 | -5.01215 | -0.71082 | H  | 11.30996 | -5.01215 | -0.71082 |
| H  | 1.6428   | -7.4022  | -0.87193 | H  | 1.63141  | -7.35773 | -0.90695 | H  | 1.60731  | -7.22972 | -1.50023 | H  | 1.60731  | -7.22972 | -1.50023 |
| Co | -0.12659 | -0.02302 | 0.00143  | Ni | -0.01149 | 0.02564  | -0.39099 | Ti | 0.07312  | -0.01638 | 0.7821   | Mn | 0.07312  | -0.01638 | 0.7821   |
|    |          |          |          |    |          |          |          | O  | 0.03409  | -0.05736 | 2.52112  | Cl | 0.03048  | -0.06115 | 2.6819   |

Table S5. Optimised cartesian coordinates for MPcs **3b**, **4b**, **5b** and **6b**.

| 3b |          |          | 4b       |   |          | 5b       |          |   | 6b       |          |          |   |          |          |          |
|----|----------|----------|----------|---|----------|----------|----------|---|----------|----------|----------|---|----------|----------|----------|
| C  | -3.6271  | -2.12978 | -0.38012 | C | -3.57393 | -2.18102 | -0.31555 | C | -3.59773 | -2.33726 | -0.00513 | C | -3.44148 | -2.13234 | -0.03228 |
| C  | -4.12648 | -0.89262 | -0.29333 | C | -4.09289 | -0.87529 | -0.32599 | C | -4.10984 | -1.07837 | 0.05195  | C | -3.92635 | -0.89264 | 0.01511  |
| C  | -5.4964  | -0.64296 | -0.22461 | C | -5.47116 | -0.65447 | -0.33089 | C | -5.47185 | -0.85668 | 0.2556   | C | -5.28206 | -0.62834 | -0.20699 |

|   |          |          |          |   |          |          |          |   |          |          |          |   |          |          |          |
|---|----------|----------|----------|---|----------|----------|----------|---|----------|----------|----------|---|----------|----------|----------|
| C | -6.36508 | -1.76465 | -0.27119 | C | -6.3167  | -1.76116 | -0.31985 | C | -6.31949 | -1.99399 | 0.33049  | C | -6.12935 | -1.72894 | -0.49554 |
| C | -5.82083 | -3.07802 | -0.38812 | C | -5.78353 | -3.06749 | -0.29542 | C | -5.77334 | -3.3074  | 0.22174  | C | -5.58733 | -3.04148 | -0.57737 |
| C | -4.42835 | -3.25863 | -0.41915 | C | -4.40465 | -3.29744 | -0.2969  | C | -4.37839 | -3.47875 | 0.1043   | C | -4.21777 | -3.24668 | -0.33403 |
| C | -2.10539 | -2.00513 | -0.42815 | C | -2.13029 | -2.04169 | -0.32009 | C | -2.10565 | -2.18103 | -0.22276 | C | -1.9724  | -2.01096 | 0.28821  |
| C | -2.92037 | 0.05737  | -0.28339 | C | -2.95416 | 0.01311  | -0.33408 | C | -3.04782 | -0.16177 | -0.14753 | C | -2.85858 | -0.0205  | 0.30535  |
| H | -7.42504 | -1.62049 | -0.21619 | H | -7.3929  | -1.62802 | -0.33796 | H | -7.37236 | -1.86428 | 0.46544  | H | -7.17642 | -1.57157 | -0.65638 |
| H | -3.99954 | -4.23774 | -0.47194 | H | -4.0161  | -4.30961 | -0.28503 | H | -3.93786 | -4.45399 | 0.08701  | H | -3.78884 | -4.22486 | -0.38356 |
| N | -1.75727 | -0.67743 | -0.37839 | N | -1.77596 | -0.70873 | -0.32962 | N | -1.87973 | -0.8571  | -0.2522  | N | -1.6749  | -0.7063  | 0.51793  |
| N | -1.34442 | -3.03198 | -0.5026  | N | -1.31957 | -3.1041  | -0.31984 | N | -1.20361 | -3.17511 | -0.38453 | N | -1.19288 | -3.03499 | 0.30845  |
| N | -3.04084 | 1.32445  | -0.19918 | N | -3.0928  | 1.34387  | -0.34382 | N | -3.19074 | 1.17652  | -0.27859 | N | -3.04443 | 1.26205  | 0.33632  |
| C | -2.03968 | 2.11553  | -0.18873 | C | -2.04878 | 2.12765  | -0.34416 | C | -2.19704 | 2.02337  | -0.29329 | C | -2.09174 | 2.05694  | 0.50379  |
| C | -2.17564 | 3.63475  | -0.09685 | C | -2.18207 | 3.59006  | -0.35165 | C | -2.30256 | 3.50059  | -0.70397 | C | -2.19788 | 3.50859  | 0.01702  |
| C | -0.92563 | 4.12656  | -0.12724 | C | -0.88538 | 4.10495  | -0.34194 | C | -1.05528 | 4.02968  | -0.67289 | C | -0.96133 | 4.01191  | 0.02145  |
| C | -3.30963 | 4.46075  | 0.00257  | C | -3.30489 | 4.40662  | -0.37269 | C | -3.41324 | 4.26147  | -1.06904 | C | -3.3043  | 4.25727  | -0.40852 |
| C | 0.01956  | 2.93644  | -0.22421 | C | 0.02047  | 2.95788  | -0.33002 | C | -0.07591 | 2.9424   | -0.24483 | C | -0.01337 | 2.92047  | 0.48073  |
| C | -0.65492 | 5.4857   | -0.07979 | C | -0.66204 | 5.47952  | -0.35266 | C | -0.79245 | 5.35234  | -1.00465 | C | -0.67651 | 5.311    | -0.37163 |
| C | -3.078   | 5.86171  | 0.07134  | C | -3.07671 | 5.79106  | -0.37582 | C | -3.19213 | 5.61965  | -1.40121 | C | -3.0616  | 5.58613  | -0.83603 |
| H | -4.30015 | 4.05149  | 0.01944  | H | -4.30532 | 3.99098  | -0.39389 | H | -4.39324 | 3.83643  | -1.09636 | H | -4.29198 | 3.84389  | -0.41421 |
| C | -1.75348 | 6.35991  | 0.01203  | C | -1.77355 | 6.32074  | -0.36694 | C | -1.88108 | 6.15958  | -1.37314 | C | -1.74714 | 6.10996  | -0.80251 |
| H | -1.58786 | 7.41688  | 0.03992  | H | -1.66198 | 7.40014  | -0.37398 | H | -1.7192  | 7.18484  | -1.63164 | H | -1.57003 | 7.11768  | -1.10821 |
| N | -0.7126  | 1.78332  | -0.25696 | N | -0.70609 | 1.77027  | -0.33322 | N | -0.80543 | 1.71541  | 0.1332   | N | -0.75164 | 1.7969   | 1.14867  |
| C | -0.08097 | -2.92539 | -0.54774 | C | -0.02048 | -2.95844 | -0.3292  | C | 0.09272  | -3.00559 | -0.33877 | C | 0.03208  | -2.91233 | 0.49611  |
| C | 0.88832  | -4.09709 | -0.66165 | C | 0.88537  | -4.1055  | -0.34053 | C | 1.11349  | -4.06943 | -0.73401 | C | 0.96997  | -4.01041 | 0.0243   |
| C | 2.1454   | -3.58549 | -0.69268 | C | 2.18206  | -3.59061 | -0.35011 | C | 2.35366  | -3.50912 | -0.71126 | C | 2.20535  | -3.50731 | -0.00063 |
| C | 0.62872  | -5.45231 | -0.72944 | C | 0.66206  | -5.48008 | -0.35081 | C | 0.90047  | -5.39675 | -1.08457 | C | 0.67622  | -5.31277 | -0.35749 |
| C | 2.02499  | -2.0468  | -0.58559 | C | 2.04877  | -2.1282  | -0.34312 | C | 2.20453  | -2.03121 | -0.29933 | C | 2.11173  | -2.05195 | 0.47564  |
| C | 3.27782  | -4.40297 | -0.81008 | C | 3.3049   | -4.40717 | -0.37063 | C | 3.49844  | -4.24306 | -1.04265 | C | 3.30362  | -4.25885 | -0.43418 |
| C | 1.72842  | -6.31086 | -0.84046 | C | 1.77357  | -6.3213  | -0.36456 | C | 2.02319  | -6.17337 | -1.41879 | C | 1.74057  | -6.11873 | -0.79333 |
| C | 3.04801  | -5.80084 | -0.8981  | C | 3.07674  | -5.79161 | -0.37336 | C | 3.31923  | -5.60252 | -1.4022  | C | 3.05644  | -5.59509 | -0.84203 |

|    |          |          |          |   |          |          |          |   |          |          |          |   |          |          |          |
|----|----------|----------|----------|---|----------|----------|----------|---|----------|----------|----------|---|----------|----------|----------|
| H  | 4.2613   | -3.98764 | -0.83502 | H | 4.30532  | -3.99151 | -0.39172 | H | 4.47173  | -3.79507 | -1.02605 | H | 4.28778  | -3.84102 | -0.46047 |
| N  | 0.70766  | -1.69227 | -0.50764 | N | 0.70607  | -1.77083 | -0.33265 | N | 0.79904  | -1.78173 | 0.12372  | N | 0.78447  | -1.78568 | 1.14384  |
| N  | 1.29459  | 3.05364  | -0.26698 | N | 1.31956  | 3.10355  | -0.32045 | N | 1.17509  | 3.112    | -0.21099 | N | 1.21474  | 3.04533  | 0.27454  |
| N  | 3.03099  | -1.26911 | -0.57796 | N | 3.09279  | -1.34443 | -0.34277 | N | 3.16407  | -1.17923 | -0.32294 | N | 3.06931  | -1.25728 | 0.28983  |
| C  | 2.90757  | 0.00081  | -0.50951 | C | 2.95415  | -0.01366 | -0.33349 | C | 2.96857  | 0.12657  | -0.18344 | C | 2.89048  | 0.03138  | 0.27467  |
| C  | 4.1024   | 0.94997  | -0.50331 | C | 4.09287  | 0.87474  | -0.32553 | C | 4.02344  | 1.04616  | 0.01689  | C | 3.95833  | 0.90582  | -0.01184 |
| C  | 3.60199  | 2.18665  | -0.41555 | C | 3.57391  | 2.18047  | -0.31557 | C | 3.49474  | 2.28006  | 0.05722  | C | 3.47094  | 2.14481  | -0.06327 |
| C  | 5.47498  | 0.69653  | -0.5654  | C | 5.47114  | 0.65391  | -0.33015 | C | 5.39755  | 0.83971  | 0.15004  | C | 5.3088   | 0.64313  | -0.22762 |
| C  | 2.08478  | 2.05318  | -0.36322 | C | 2.13028  | 2.04114  | -0.32026 | C | 2.01069  | 2.10889  | -0.12464 | C | 2.00246  | 2.02253  | 0.26015  |
| C  | 4.40262  | 3.31396  | -0.39065 | C | 4.40463  | 3.2969   | -0.29715 | C | 4.24825  | 3.43163  | 0.21174  | C | 4.23705  | 3.2577   | -0.37166 |
| C  | 6.34487  | 1.81882  | -0.55236 | C | 6.31668  | 1.7606   | -0.31933 | C | 6.22528  | 1.98782  | 0.25823  | C | 6.15219  | 1.74122  | -0.51905 |
| C  | 5.79806  | 3.13397  | -0.48379 | C | 5.78351  | 3.06694  | -0.29539 | C | 5.6463   | 3.28753  | 0.25937  | C | 5.60785  | 3.05285  | -0.60708 |
| H  | 7.40372  | 1.6738   | -0.59319 | H | 7.39289  | 1.62746  | -0.33722 | H | 7.28668  | 1.8773   | 0.33594  | H | 7.19693  | 1.58334  | -0.67791 |
| N  | 1.75276  | 0.72967  | -0.4344  | N | 1.77594  | 0.70818  | -0.32938 | N | 1.75947  | 0.7877   | -0.23704 | N | 1.71084  | 0.71909  | 0.50121  |
| H  | 3.97818  | 4.28739  | -0.30377 | H | 4.01609  | 4.30907  | -0.28565 | H | 3.78522  | 4.39554  | 0.27664  | H | 3.79744  | 4.23251  | -0.42799 |
| H  | -0.37167 | -5.82652 | -0.70437 | H | -0.34623 | -5.88136 | -0.34507 | H | -0.08244 | -5.8146  | -1.09833 | H | -0.32571 | -5.69044 | -0.32138 |
| H  | -5.87045 | 0.35342  | -0.14397 | H | -5.8724  | 0.35388  | -0.35204 | H | -5.86401 | 0.13508  | 0.34488  | H | -5.667   | 0.3684   | -0.16523 |
| H  | 0.34639  | 5.85811  | -0.11285 | H | 0.34625  | 5.88078  | -0.34683 | H | 0.20417  | 5.74256  | -0.98068 | H | 0.32381  | 5.69099  | -0.34943 |
| H  | 5.85588  | -0.30499 | -0.62395 | H | 5.87238  | -0.35445 | -0.35092 | H | 5.81286  | -0.14565 | 0.1648   | H | 5.693    | -0.35381 | -0.17211 |
| O  | -4.12332 | 6.8389   | 0.20792  | O | -4.08791 | 6.71944  | -0.44129 | O | -4.27705 | 6.47332  | -1.76604 | O | -4.11507 | 6.42951  | -1.31566 |
| O  | -6.63584 | -4.25595 | -0.49256 | O | -6.58254 | -4.18941 | -0.33866 | O | -6.60757 | -4.47672 | 0.20805  | O | -6.41012 | -4.16913 | -0.9081  |
| O  | 6.61023  | 4.3145   | -0.52063 | O | 6.58255  | 4.18884  | -0.33884 | O | 6.45768  | 4.46762  | 0.28876  | O | 6.4326   | 4.17523  | -0.93978 |
| O  | 4.09401  | -6.76994 | -1.05406 | O | 4.08791  | -6.72006 | -0.43815 | O | 4.43136  | -6.43001 | -1.75531 | O | 4.11028  | -6.44357 | -1.31739 |
| H  | 1.57173  | -7.36593 | -0.8864  | H | 1.66201  | -7.4007  | -0.37127 | H | 1.89944  | -7.20293 | -1.68647 | H | 1.55737  | -7.13122 | -1.09118 |
| Co | -0.00624 | 0.04537  | -0.37723 | C | -7.84988 | -4.17449 | 0.21751  | C | -7.93408 | -4.26065 | 0.70945  | C | -7.67564 | -4.11265 | -0.24154 |
| C  | -7.88405 | -4.21902 | 0.2078   | C | -8.87849 | -4.7201  | -0.51448 | C | -8.95439 | -4.92843 | 0.11217  | C | -8.76367 | -4.69496 | -0.81199 |
| C  | -8.95648 | -4.932   | -0.34113 | C | -8.06052 | -3.70285 | 1.53889  | C | -8.19238 | -3.38853 | 1.78236  | C | -7.78168 | -3.47046 | 0.99957  |
| C  | -8.05148 | -3.51449 | 1.4089   | C | -10.1806 | -4.81955 | 0.04288  | C | -10.2697 | -4.74347 | 0.5439   | C | -9.98917 | -4.70842 | -0.1344  |
| C  | -10.1901 | -4.97196 | 0.3139   | H | -8.68337 | -5.08027 | -1.52023 | H | -8.74926 | -5.59943 | -0.69676 | H | -8.67978 | -5.14849 | -1.77871 |

|   |          |          |          |   |          |          |          |   |          |          |          |   |          |          |          |
|---|----------|----------|----------|---|----------|----------|----------|---|----------|----------|----------|---|----------|----------|----------|
| H | -8.82752 | -5.45294 | -1.26547 | C | -9.31619 | -3.78061 | 2.09281  | C | -9.47004 | -3.20316 | 2.22123  | C | -8.9641  | -3.46437 | 1.67141  |
| C | -9.29393 | -3.553   | 2.06964  | H | -7.226   | -3.29332 | 2.09869  | H | -7.38582 | -2.87078 | 2.25625  | H | -6.92492 | -2.98392 | 1.42217  |
| H | -7.23962 | -2.95479 | 1.82561  | C | -11.2704 | -5.37825 | -0.67801 | C | -11.3221 | -5.42161 | -0.08102 | C | -11.1144 | -5.32939 | -0.6956  |
| C | -11.2511 | -5.70211 | -0.24233 | C | -10.4096 | -4.33411 | 1.37214  | C | -10.5324 | -3.87835 | 1.60086  | C | -10.0871 | -4.09993 | 1.1178   |
| C | -10.3622 | -4.28503 | 1.52006  | H | -9.48338 | -3.42396 | 3.10632  | H | -9.66439 | -2.54147 | 3.03994  | H | -9.03439 | -2.97615 | 2.62117  |
| H | -9.42734 | -3.02581 | 2.99055  | C | -12.5242 | -5.4533  | -0.11377 | C | -12.5959 | -5.23172 | 0.3448   | C | -12.2876 | -5.35054 | -0.01149 |
| C | -12.488  | -5.74815 | 0.41345  | H | -11.097  | -5.74641 | -1.68632 | H | -11.1208 | -6.08849 | -0.89357 | H | -11.0492 | -5.78801 | -1.66003 |
| H | -11.1152 | -6.22524 | -1.16556 | C | -11.7144 | -4.4272  | 1.92423  | C | -11.8546 | -3.69419 | 2.02992  | C | -11.305  | -4.13441 | 1.80656  |
| C | -11.6019 | -4.33257 | 2.17783  | C | -12.75   | -4.97385 | 1.19975  | C | -12.866  | -4.35925 | 1.41224  | C | -12.3823 | -4.75034 | 1.25297  |
| C | -12.6638 | -5.06373 | 1.62184  | H | -13.348  | -5.88322 | -0.67708 | H | -13.3981 | -5.75119 | -0.13601 | H | -13.146  | -5.83025 | -0.44074 |
| H | -13.2979 | -6.30557 | -0.01081 | H | -11.8824 | -4.05889 | 2.93373  | H | -12.0684 | -3.03164 | 2.84249  | H | -11.3887 | -3.67788 | 2.77078  |
| H | -11.738  | -3.81126 | 3.10084  | H | -13.7441 | -5.04011 | 1.6333   | H | -13.8746 | -4.2189  | 1.74054  | H | -13.3121 | -4.78019 | 1.78499  |
| H | -13.6088 | -5.09841 | 2.12311  | C | 5.37809  | -6.37794 | -0.05877 | C | 5.5897   | -6.07112 | -1.00654 | C | 5.36389  | -6.17607 | -0.68279 |
| C | 5.42015  | -6.33141 | -0.74817 | C | 6.39445  | -6.56494 | -0.96439 | C | 6.81837  | -6.38734 | -1.48296 | C | 6.50903  | -6.43042 | -1.36459 |
| C | 6.47608  | -7.08684 | -1.27174 | C | 5.6411   | -5.94206 | 1.26452  | C | 5.44874  | -5.40259 | 0.21838  | C | 5.41421  | -5.66874 | 0.62558  |
| C | 5.68667  | -5.2017  | 0.03743  | C | 7.74175  | -6.32101 | -0.58641 | C | 7.95322  | -6.08694 | -0.72949 | C | 7.75123  | -6.21033 | -0.76054 |
| C | 7.80014  | -6.7313  | -1.01278 | H | 6.1598   | -6.9072  | -1.96791 | H | 6.92017  | -6.87061 | -2.43175 | H | 6.46254  | -6.80351 | -2.36497 |
| H | 6.26354  | -7.94566 | -1.8729  | C | 6.93736  | -5.69283 | 1.64834  | C | 6.54274  | -5.08158 | 0.95461  | C | 6.61217  | -5.44435 | 1.22908  |
| C | 7.02183  | -4.83556 | 0.29246  | H | 4.81575  | -5.81879 | 1.95846  | H | 4.47236  | -5.14637 | 0.57286  | H | 4.50523  | -5.45912 | 1.15151  |
| H | 4.88316  | -4.62044 | 0.43893  | C | 8.82365  | -6.50214 | -1.48933 | C | 9.22194  | -6.44137 | -1.19475 | C | 8.9405   | -6.4871  | -1.45123 |
| C | 8.84525  | -7.50735 | -1.53613 | C | 8.02144  | -5.8709  | 0.74567  | C | 7.81911  | -5.43273 | 0.4938   | C | 7.80405  | -5.71626 | 0.54046  |
| C | 8.07733  | -5.60469 | -0.23334 | H | 7.14828  | -5.36145 | 2.66215  | H | 6.42802  | -4.56349 | 1.88446  | H | 6.64651  | -5.06284 | 2.22789  |
| H | 7.23544  | -3.97238 | 0.88554  | C | 10.11899 | -6.2508  | -1.09579 | C | 10.31842 | -6.15898 | -0.45002 | C | 10.13748 | -6.27734 | -0.8483  |
| C | 10.17504 | -7.15133 | -1.2793  | H | 8.6108   | -6.84288 | -2.49968 | H | 9.32584  | -6.93723 | -2.13746 | H | 8.90393  | -6.86547 | -2.45233 |
| H | 8.62711  | -8.37029 | -2.12979 | C | 9.36873  | -5.62248 | 1.11924  | C | 8.96222  | -5.13782 | 1.24636  | C | 9.04979  | -5.50074 | 1.1443   |
| C | 9.41012  | -5.24716 | 0.0222   | C | 10.39553 | -5.80729 | 0.22063  | C | 10.18783 | -5.49912 | 0.78327  | C | 10.1925  | -5.77818 | 0.46325  |
| C | 10.45755 | -6.02182 | -0.50197 | H | 10.93683 | -6.39312 | -1.79696 | H | 11.28773 | -6.44128 | -0.80585 | H | 11.04476 | -6.4936  | -1.37538 |
| H | 10.97374 | -7.74284 | -1.6779  | H | 9.57644  | -5.28258 | 2.13122  | H | 8.87266  | -4.6299  | 2.1848   | H | 9.10152  | -5.11852 | 2.14168  |
| H | 9.62806  | -4.38564 | 0.61543  | H | 11.42235 | -5.61359 | 0.51827  | H | 11.06086 | -5.28055 | 1.36163  | H | 11.14158 | -5.6163  | 0.92797  |

|   |          |          |          |   |          |         |          |   |          |         |          |   |          |         |          |
|---|----------|----------|----------|---|----------|---------|----------|---|----------|---------|----------|---|----------|---------|----------|
| H | 11.47341 | -5.74864 | -0.30619 | C | 7.84976  | 4.17405 | 0.21763  | C | 7.79524  | 4.22344 | 0.73485  | C | 7.69529  | 4.11774 | -0.26844 |
| C | 7.89074  | 4.20561  | 0.11044  | C | 8.87862  | 4.71917 | -0.51438 | C | 8.79599  | 4.92327 | 0.14281  | C | 8.78864  | 4.70008 | -0.83037 |
| C | 8.95392  | 4.92791  | -0.44413 | C | 8.06001  | 3.70304 | 1.5393   | C | 8.08031  | 3.29093 | 1.74933  | C | 7.79529  | 3.4726  | 0.97363  |
| C | 8.09775  | 3.42045  | 1.25459  | C | 10.18055 | 4.81874 | 0.04327  | C | 10.12001 | 4.71965 | 0.52734  | C | 10.00816 | 4.71072 | -0.14385 |
| C | 10.21804 | 4.89726  | 0.15116  | H | 8.68379  | 5.07887 | -1.52035 | H | 8.56679  | 5.6342  | -0.62375 | H | 8.71673  | 5.15559 | -1.79598 |
| H | 8.79482  | 5.50963  | -1.32635 | C | 9.31554  | 3.78093 | 2.09349  | C | 9.3671   | 3.0878  | 2.14396  | C | 8.97421  | 3.46392 | 1.65258  |
| C | 9.37014  | 3.38896  | 1.85574  | H | 7.2253   | 3.29389 | 2.09908  | H | 7.28648  | 2.74134 | 2.21373  | H | 6.9371   | 2.98753 | 1.39062  |
| H | 7.29273  | 2.85223  | 1.67324  | C | 11.27063 | 5.37696 | -0.67762 | C | 11.15628 | 5.42644 | -0.09483 | C | 11.13583 | 5.33071 | -0.69941 |
| C | 11.26984 | 5.63662  | -0.40946 | C | 10.40916 | 4.33395 | 1.37283  | C | 10.40848 | 3.804   | 1.53471  | C | 10.0991  | 4.10167 | 1.1076   |
| C | 10.42927 | 4.13072  | 1.30206  | H | 9.48244  | 3.42476 | 3.10722  | H | 9.58649  | 2.38124 | 2.9174   | H | 9.04127  | 2.97329 | 2.60174  |
| H | 9.53307  | 2.80103  | 2.73418  | C | 12.52428 | 5.45215 | -0.11309 | C | 12.43903 | 5.22165 | 0.29105  | C | 12.30438 | 5.35517 | -0.00831 |
| C | 12.537   | 5.61277  | 0.18691  | H | 11.0975  | 5.74464 | -1.68615 | H | 10.93647 | 6.1279  | -0.87313 | H | 11.07641 | 5.78629 | -1.66507 |
| H | 11.10393 | 6.2201   | -1.29058 | C | 11.71387 | 4.42715 | 1.92521  | C | 11.73725 | 3.61104 | 1.92745  | C | 11.3125  | 4.13738 | 1.80442  |
| C | 11.6992  | 4.10842  | 1.90063  | C | 12.74972 | 4.97332 | 1.20072  | C | 12.73236 | 4.30655 | 1.31683  | C | 12.392   | 4.7565  | 1.25807  |
| C | 12.75204 | 4.84925  | 1.34036  | H | 13.34834 | 5.88169 | -0.67641 | H | 13.23233 | 5.75811 | -0.18747 | H | 13.16407 | 5.83575 | -0.43249 |
| H | 13.33998 | 6.17749  | -0.2407  | H | 11.8816  | 4.05933 | 2.93493  | H | 11.96936 | 2.9158  | 2.70587  | H | 11.39065 | 3.67934 | 2.76713  |
| H | 11.86524 | 3.52682  | 2.78182  | H | 13.74368 | 5.03968 | 1.63449  | H | 13.74775 | 4.15731 | 1.62032  | H | 13.31758 | 4.78969 | 1.79632  |
| H | 13.72015 | 4.83097  | 1.79639  | C | -5.37782 | 6.37803 | -0.06043 | C | -5.44616 | 6.12721 | -1.02341 | C | -5.36724 | 6.16755 | -0.67849 |
| C | -5.44836 | 6.39222  | -0.08672 | C | -6.39507 | 6.5659  | -0.96488 | C | -6.66666 | 6.44812 | -1.51549 | C | -6.51103 | 6.42389 | -1.36021 |
| C | -6.28488 | 7.2325   | -0.83247 | C | -5.63969 | 5.94207 | 1.26308  | C | -5.32481 | 5.46532 | 0.21261  | C | -5.4173  | 5.66226 | 0.63187  |
| C | -5.92246 | 5.1555   | 0.37015  | C | -7.74211 | 6.32282 | -0.58547 | C | -7.81389 | 6.14419 | -0.77972 | C | -7.75365 | 6.20786 | -0.75587 |
| C | -7.61075 | 6.86513  | -1.08424 | H | -6.16129 | 6.9082  | -1.96859 | H | -6.7521  | 6.93743 | -2.46271 | H | -6.46299 | 6.79477 | -2.36155 |
| H | -5.90841 | 8.16093  | -1.20687 | C | -6.9357  | 5.69364 | 1.64825  | C | -6.43062 | 5.15096 | 0.93218  | C | -6.61581 | 5.43908 | 1.23444  |
| C | -7.25611 | 4.78749  | 0.12348  | H | -4.8137  | 5.81811 | 1.95613  | H | -4.35512 | 5.20911 | 0.58868  | H | -4.50803 | 5.45387 | 1.15823  |
| H | -5.27588 | 4.49789  | 0.91246  | C | -8.82489 | 6.50488 | -1.48717 | C | -9.07925 | 6.4928  | -1.26204 | C | -8.94261 | 6.48759 | -1.44637 |
| C | -8.44586 | 7.72096  | -1.81803 | C | -8.02066 | 5.87263 | 0.74682  | C | -7.69667 | 5.49062 | 0.44528  | C | -7.80757 | 5.71405 | 0.54589  |
| C | -8.10015 | 5.64601  | -0.60231 | H | -7.14573 | 5.36222 | 2.66223  | H | -6.33544 | 4.64459 | 1.87049  | H | -6.65002 | 5.05672 | 2.23233  |
| H | -7.62945 | 3.85475  | 0.48876  | C | -10.12   | 6.25434 | -1.09225 | C | -10.1849 | 6.19093 | -0.53688 | C | -10.1399 | 6.27883 | -0.84358 |
| C | -9.77747 | 7.3591   | -2.06117 | H | -8.61291 | 6.84568 | -2.49767 | H | -9.17464 | 6.99855 | -2.19914 | H | -8.90495 | 6.8673  | -2.44593 |

|   |          |         |          |    |          |          |          |    |          |          |          |    |          |          |          |
|---|----------|---------|----------|----|----------|----------|----------|----|----------|----------|----------|----|----------|----------|----------|
| H | -8.06759 | 8.65008 | -2.18917 | C  | -9.36769 | 5.62505  | 1.12182  | C  | -8.84666 | 5.1831   | 1.17854  | C  | -9.05424 | 5.50205  | 1.15077  |
| C | -9.43495 | 5.28589 | -0.84291 | C  | -10.3954 | 5.81075  | 0.22439  | C  | -10.0673 | 5.52552  | 0.69545  | C  | -10.1961 | 5.78054  | 0.46835  |
| C | -10.2717 | 6.14307 | -1.57415 | H  | -10.9385 | 6.39737  | -1.79249 | H  | -11.1531 | 6.46075  | -0.90575 | H  | -11.0465 | 6.49552  | -1.37092 |
| H | -10.4155 | 8.01233 | -2.62017 | H  | -9.57452 | 5.28509  | 2.13396  | H  | -8.76247 | 4.6784   | 2.11844  | H  | -9.1077  | 5.12225  | 2.14824  |
| H | -9.81405 | 4.3585  | -0.47048 | H  | -11.422  | 5.61769  | 0.52311  | H  | -10.9455 | 5.28789  | 1.25672  | H  | -11.1462 | 5.62007  | 0.9326   |
| H | -11.289  | 5.86705 | -1.75864 | Ni | -0.00001 | -0.00028 | -0.3309  | Ti | -0.07292 | -0.07919 | -0.54836 | Mn | 0.02033  | 0.00781  | 1.12321  |
|   |          |         |          |    |          |          |          | O  | -0.03943 | -0.21039 | -2.2863  | Cl | -0.10035 | -0.03711 | 3.28018  |

Table S6. Optimised cartesian coordinates for MPcs **3c**, **4c**, **5c** and **6c**.

| <b>3c</b> |          |          |          | <b>4c</b> |          |          |          | <b>5c</b> |          |          |          | <b>6c</b> |          |          |          |
|-----------|----------|----------|----------|-----------|----------|----------|----------|-----------|----------|----------|----------|-----------|----------|----------|----------|
| C         | -3.6169  | -2.12223 | -0.36319 | C         | 3.58712  | 2.15914  | -0.14801 | C         | 3.67041  | 2.1394   | -0.04219 | C         | -3.6138  | -2.17037 | -0.22911 |
| C         | -4.11667 | -0.88563 | -0.28573 | C         | 4.09946  | 0.85134  | -0.13703 | C         | 4.13764  | 0.88194  | -0.03772 | C         | -4.1132  | -0.85917 | -0.15504 |
| C         | -5.48872 | -0.63687 | -0.2144  | C         | 5.47675  | 0.62232  | -0.14059 | C         | 5.50015  | 0.60881  | -0.09464 | C         | -5.48858 | -0.61701 | -0.17197 |
| C         | -6.3538  | -1.75729 | -0.26348 | C         | 6.32748  | 1.72465  | -0.15193 | C         | 6.37847  | 1.74161  | -0.14564 | C         | -6.34566 | -1.70851 | -0.25688 |
| C         | -5.80366 | -3.06132 | -0.39629 | C         | 5.80041  | 3.03358  | -0.15092 | C         | 5.83248  | 3.0661   | -0.18568 | C         | -5.83178 | -3.02339 | -0.31941 |
| C         | -4.41262 | -3.24697 | -0.40919 | C         | 4.42421  | 3.27184  | -0.15164 | C         | 4.44293  | 3.23902  | -0.12406 | C         | -4.4614  | -3.27451 | -0.3112  |
| C         | -2.10441 | -1.99878 | -0.38814 | C         | 2.14297  | 2.02744  | -0.14528 | C         | 2.17241  | 2.06012  | -0.03989 | C         | -2.16577 | -2.06011 | -0.19397 |
| C         | -2.9191  | 0.06394  | -0.28504 | C         | 2.95573  | -0.03144 | -0.128   | C         | 3.02439  | 0.01063  | -0.02229 | C         | -2.96058 | 0.02093  | -0.08013 |
| H         | -7.41382 | -1.6225  | -0.20575 | H         | 7.4032   | 1.58614  | -0.16843 | H         | 7.43478  | 1.59005  | -0.16349 | H         | -7.42008 | -1.56056 | -0.28296 |
| H         | -3.98503 | -4.22583 | -0.46487 | H         | 4.04091  | 4.28602  | -0.1579  | H         | 4.00029  | 4.19449  | -0.16352 | H         | -4.08549 | -4.28979 | -0.36745 |
| N         | -1.76417 | -0.67004 | -0.35421 | N         | 1.78154  | 0.69636  | -0.13324 | N         | 1.85376  | 0.74499  | 0.1161   | N         | -1.80064 | -0.7302  | -0.09847 |
| N         | -1.34207 | -3.02616 | -0.4535  | N         | 1.33788  | 3.09394  | -0.15388 | N         | 1.33026  | 3.09181  | -0.23717 | N         | -1.36609 | -3.11098 | -0.23751 |
| N         | -3.042   | 1.32971  | -0.22508 | N         | 3.08758  | -1.36273 | -0.1155  | N         | 3.11299  | -1.32158 | -0.19678 | N         | -3.066   | 1.33824  | -0.05436 |
| C         | -2.03745 | 2.11617  | -0.19014 | C         | 2.0393   | -2.14086 | -0.10642 | C         | 2.06595  | -2.06004 | -0.43272 | C         | -2.01946 | 2.14551  | -0.0854  |
| C         | -2.17299 | 3.63649  | -0.09089 | C         | 2.165    | -3.60377 | -0.0919  | C         | 2.16397  | -3.62731 | -0.28858 | C         | -2.14901 | 3.59259  | -0.16424 |
| C         | -0.9197  | 4.12031  | -0.12086 | C         | 0.86543  | -4.11238 | -0.08401 | C         | 0.9085   | -4.1085  | -0.2711  | C         | -0.84348 | 4.10594  | -0.24084 |
| C         | -3.29666 | 4.46359  | 0.00813  | C         | 3.28297  | -4.42639 | -0.07923 | C         | 3.26391  | -4.47638 | -0.10625 | C         | -3.26956 | 4.42287  | -0.16874 |
| C         | 0.02536  | 2.9266   | -0.20873 | C         | -0.03446 | -2.96015 | -0.0975  | C         | -0.04887 | -2.88486 | -0.40978 | C         | 0.05036  | 2.96932  | -0.2039  |

|   |          |          |          |   |          |          |          |   |          |          |          |   |          |          |          |
|---|----------|----------|----------|---|----------|----------|----------|---|----------|----------|----------|---|----------|----------|----------|
| C | -0.63585 | 5.47306  | -0.08029 | C | 0.63441  | -5.48496 | -0.06153 | C | 0.62853  | -5.4757  | -0.08663 | C | -0.62005 | 5.48464  | -0.32823 |
| C | -3.05047 | 5.85514  | 0.05884  | C | 3.0467   | -5.80927 | -0.06614 | C | 3.02817  | -5.88359 | -0.01117 | C | -3.03372 | 5.79449  | -0.2604  |
| H | -4.28871 | 4.06416  | 0.04214  | H | 4.28593  | -4.01602 | -0.07426 | H | 4.24719  | -4.06173 | 0.01796  | H | -4.27059 | 4.01438  | -0.09673 |
| C | -1.72318 | 6.35089  | 0.0053   | C | 1.74224  | -6.33253 | -0.05526 | C | 1.70915  | -6.36797 | -0.02892 | C | -1.72522 | 6.32249  | -0.33902 |
| H | -1.55278 | 7.40672  | 0.03437  | H | 1.62468  | -7.41115 | -0.04061 | H | 1.53772  | -7.4178  | 0.03204  | H | -1.61533 | 7.40002  | -0.40428 |
| N | -0.70651 | 1.77665  | -0.23412 | N | 0.69862  | -1.77674 | -0.10968 | N | 0.65743  | -1.64659 | -0.83414 | N | -0.68377 | 1.79869  | -0.10694 |
| C | -0.07887 | -2.92543 | -0.53118 | C | 0.0382   | 2.9551   | -0.1525  | C | 0.07761  | 2.90093  | -0.51695 | C | -0.04974 | -2.99318 | -0.1916  |
| C | 0.87692  | -4.09159 | -0.66375 | C | -0.86165 | 4.10737  | -0.16459 | C | -0.90581 | 4.09278  | -0.37393 | C | 0.84416  | -4.12948 | -0.22188 |
| C | 2.1341   | -3.58324 | -0.71779 | C | -2.16124 | 3.5988   | -0.15873 | C | -2.16546 | 3.60825  | -0.37624 | C | 2.14922  | -3.61662 | -0.13761 |
| C | 0.60861  | -5.44358 | -0.72922 | C | -0.6305  | 5.47995  | -0.18584 | C | -0.64303 | 5.45179  | -0.18587 | C | 0.6218   | -5.50772 | -0.32043 |
| C | 2.02357  | -2.0471  | -0.62143 | C | -2.03558 | 2.13585  | -0.14644 | C | -2.05342 | 2.07052  | -0.50977 | C | 2.01913  | -2.16846 | -0.06515 |
| C | 3.26168  | -4.40757 | -0.83868 | C | -3.27915 | 4.42151  | -0.17217 | C | -3.28231 | 4.45644  | -0.1932  | C | 3.27032  | -4.44519 | -0.14467 |
| C | 1.70279  | -6.30843 | -0.8384  | C | -1.73826 | 6.3276   | -0.19274 | C | -1.71737 | 6.34659  | -0.16917 | C | 1.72689  | -6.34523 | -0.3207  |
| C | 3.02447  | -5.80195 | -0.89744 | C | -3.04275 | 5.80437  | -0.18398 | C | -3.04226 | 5.87168  | -0.23955 | C | 3.03586  | -5.81848 | -0.22953 |
| H | 4.25317  | -4.00347 | -0.87954 | H | -4.28215 | 4.01124  | -0.17925 | H | -4.2793  | 4.06956  | -0.04357 | H | 4.27198  | -4.03579 | -0.09031 |
| N | 0.71303  | -1.69563 | -0.51851 | N | -0.69487 | 1.77172  | -0.14193 | N | -0.65538 | 1.62527  | -0.92622 | N | 0.6835   | -1.82114 | -0.09462 |
| N | 1.29334  | 3.04735  | -0.24966 | N | -1.33412 | -3.09898 | -0.09737 | N | -1.28601 | -3.04062 | -0.09442 | N | 1.36718  | 3.08738  | -0.24224 |
| N | 3.02813  | -1.27014 | -0.62335 | N | -3.08384 | 1.35769  | -0.141   | N | -3.0818  | 1.32425  | -0.18589 | N | 3.06483  | -1.36132 | -0.03054 |
| C | 2.90671  | -0.0032  | -0.50346 | C | -2.95202 | 0.02636  | -0.13049 | C | -2.99857 | -0.00261 | 0.02105  | C | 2.95942  | -0.0436  | -0.06251 |
| C | 4.10243  | 0.94431  | -0.48981 | C | -4.09568 | -0.85645 | -0.12827 | C | -4.10003 | -0.87355 | 0.00013  | C | 4.11297  | 0.83529  | -0.13538 |
| C | 3.59714  | 2.18022  | -0.40098 | C | -3.58338 | -2.16428 | -0.11544 | C | -3.61966 | -2.13041 | 0.02003  | C | 3.61494  | 2.14654  | -0.21785 |
| C | 5.47049  | 0.6932   | -0.54826 | C | -5.4729  | -0.62775 | -0.1422  | C | -5.46214 | -0.62087 | -0.07484 | C | 5.48812  | 0.59124  | -0.14532 |
| C | 2.07922  | 2.04674  | -0.33118 | C | -2.13922 | -2.0325  | -0.11009 | C | -2.13441 | -2.01288 | 0.05517  | C | 2.16674  | 2.03737  | -0.18958 |
| C | 4.39005  | 3.30678  | -0.38464 | C | -4.42038 | -3.27688 | -0.10517 | C | -4.41753 | -3.24754 | -0.06171 | C | 4.46418  | 3.24934  | -0.30127 |
| C | 6.33172  | 1.81422  | -0.54233 | C | -6.32371 | -1.73013 | -0.14028 | C | -6.33429 | -1.74433 | -0.13543 | C | 6.34663  | 1.68146  | -0.23146 |
| C | 5.77836  | 3.12306  | -0.49243 | C | -5.79673 | -3.03886 | -0.11578 | C | -5.79601 | -3.06887 | -0.1533  | C | 5.83424  | 2.99649  | -0.3023  |
| H | 7.39238  | 1.67771  | -0.58014 | H | -7.39923 | -1.59158 | -0.16497 | H | -7.40159 | -1.58585 | -0.15916 | H | 7.42097  | 1.53227  | -0.25289 |
| N | 1.7457   | 0.72722  | -0.39008 | N | -1.7778  | -0.70142 | -0.1206  | N | -1.84805 | -0.72762 | 0.15395  | N | 1.80042  | 0.70734  | -0.09039 |
| H | 3.96372  | 4.28475  | -0.30423 | H | -4.03707 | -4.29101 | -0.0935  | H | -3.97744 | -4.21073 | -0.07733 | H | 4.08986  | 4.26484  | -0.36414 |



|   |          |          |          |   |          |          |          |   |          |          |          |   |          |          |          |
|---|----------|----------|----------|---|----------|----------|----------|---|----------|----------|----------|---|----------|----------|----------|
| H | -0.39289 | -5.81537 | -0.69709 | H | 0.37985  | 5.87583  | -0.19209 | H | 0.36247  | 5.82038  | -0.05933 | H | -0.38555 | -5.90527 | -0.38853 |
| H | -5.87125 | 0.35943  | -0.13114 | H | 5.87256  | -0.38831 | -0.14419 | H | 5.87453  | -0.40331 | -0.11837 | H | -5.87533 | 0.39597  | -0.12726 |
| H | 0.37057  | 5.83431  | -0.11232 | H | -0.3759  | -5.88091 | -0.05427 | H | -0.3812  | -5.85318 | 0.01343  | H | 0.38787  | 5.88211  | -0.38743 |
| H | 5.85227  | -0.30494 | -0.60229 | H | -5.86877 | 0.38262  | -0.16442 | H | -5.80944 | 0.38428  | -0.1206  | H | 5.87334  | -0.42206 | -0.09532 |
| C | -5.41826 | 6.40544  | -0.12006 | C | 5.31431  | -6.46547 | -0.5099  | C | 5.32451  | -6.5414  | -0.46571 | C | -5.32639 | 6.43259  | -0.60378 |
| C | -6.34261 | 6.36178  | 0.93039  | C | 6.40996  | -6.77341 | 0.29384  | C | 6.45625  | -6.82431 | 0.25932  | C | -6.35301 | 6.83993  | 0.24642  |
| C | -5.8219  | 6.07326  | -1.41873 | C | 5.49132  | -5.99068 | -1.81178 | C | 5.46246  | -6.00624 | -1.79374 | C | -5.61329 | 5.836    | -1.83429 |
| C | -7.70661 | 6.21347  | 0.64748  | C | 7.70924  | -6.60456 | -0.20399 | C | 7.72762  | -6.59245 | -0.24649 | C | -7.6883  | 6.65299  | -0.13473 |
| H | -6.01022 | 6.47733  | 1.94166  | H | 6.22384  | -7.14675 | 1.2948   | H | 6.33739  | -7.20626 | 1.23235  | H | -6.07555 | 7.34148  | 1.16953  |
| C | -7.18258 | 5.85855  | -1.68723 | C | 6.78749  | -5.81487 | -2.30081 | C | 6.76959  | -5.80587 | -2.32421 | C | -6.94546 | 5.65336  | -2.20789 |
| H | -5.09921 | 5.98847  | -2.20249 | H | 4.62691  | -5.76896 | -2.42956 | H | 4.61308  | -5.7398  | -2.40496 | H | -4.80346 | 5.53278  | -2.48979 |
| C | -8.1308  | 6.00456  | -0.66477 | C | 7.89025  | -6.11828 | -1.50734 | C | 7.89014  | -6.1303  | -1.54867 | C | -7.98092 | 6.06568  | -1.37188 |
| H | -7.49821 | 5.58496  | -2.67136 | H | 6.93009  | -5.44654 | -3.31279 | H | 6.91518  | -5.42    | -3.31634 | H | -7.17262 | 5.19651  | -3.16671 |
| O | -4.08254 | 6.83212  | 0.16338  | O | 4.05819  | -6.74004 | 0.00551  | O | 4.08651  | -6.83392 | 0.16332  | O | -4.03569 | 6.73984  | -0.21718 |
| C | -7.86373 | -4.2288  | 0.15628  | C | 7.82491  | 4.19627  | 0.42607  | C | 7.81104  | 4.27803  | 0.41921  | C | -7.86474 | -4.19417 | 0.19387  |
| C | -8.02409 | -3.7927  | 1.4835   | C | 7.99697  | 3.71154  | 1.72541  | C | 7.97228  | 3.72719  | 1.71618  | C | -8.01023 | -3.79674 | 1.52682  |
| C | -8.95043 | -4.72911 | -0.54355 | C | 8.86897  | 4.84046  | -0.23716 | C | 8.89215  | 4.89246  | -0.20126 | C | -8.92658 | -4.77331 | -0.49796 |
| C | -9.27446 | -3.96007 | 2.11752  | C | 9.23593  | 3.86765  | 2.35123  | C | 9.22024  | 3.85425  | 2.37067  | C | -9.24063 | -3.973   | 2.16221  |
| H | -7.20751 | -3.34657 | 2.01221  | H | 7.17275  | 3.22513  | 2.23683  | H | 7.17059  | 3.20199  | 2.20207  | H | -7.16963 | -3.3616  | 2.05759  |
| C | -10.1733 | -4.91982 | 0.07955  | C | 10.10673 | 5.00366  | 0.39841  | C | 10.12588 | 4.98858  | 0.4311   | C | -10.1526 | -4.95397 | 0.15313  |
| H | -8.83759 | -4.98604 | -1.57515 | H | 8.68736  | 5.20643  | -1.24172 | H | 8.77497  | 5.27931  | -1.18359 | H | -8.78808 | -5.08049 | -1.52758 |
| C | -10.3446 | -4.5551  | 1.42079  | C | 10.28555 | 4.50703  | 1.69846  | C | 10.27642 | 4.51167  | 1.73339  | C | -10.3123 | -4.54896 | 1.48458  |
| H | -9.41112 | -3.63734 | 3.12935  | H | 9.37251  | 3.49177  | 3.36141  | H | 9.36317  | 3.46218  | 3.3595   | H | -9.35503 | -3.66501 | 3.19747  |
| O | -6.61781 | -4.21789 | -0.5425  | O | 6.61151  | 4.14709  | -0.23403 | O | 6.59073  | 4.26846  | -0.31079 | O | -6.65783 | -4.11634 | -0.47635 |
| C | 7.86964  | 4.2181   | 0.06198  | C | -7.83255 | -4.18716 | 0.45098  | C | -7.82054 | -4.259   | 0.44021  | C | 7.86513  | 4.16821  | 0.21617  |
| C | 8.08319  | 3.66365  | 1.33656  | C | -8.02516 | -3.68571 | 1.74105  | C | -8.0021  | -3.69553 | 1.72573  | C | 8.00171  | 3.77872  | 1.55242  |
| C | 8.93205  | 4.76237  | -0.64253 | C | -8.86861 | -4.83182 | -0.22404 | C | -8.89226 | -4.88277 | -0.19088 | C | 8.93213  | 4.74175  | -0.47242 |
| C | 9.36168  | 3.76361  | 1.92618  | C | -9.27656 | -3.82558 | 2.3455   | C | -9.26124 | -3.8108  | 2.36231  | C | 9.22825  | 3.95739  | 2.19454  |
| H | 7.28532  | 3.17877  | 1.85982  | H | -7.2069  | -3.19898 | 2.2617   | H | -7.20364 | -3.17411 | 2.22569  | H | 7.1572   | 3.34775  | 2.08037  |

|    |          |          |          |   |          |          |          |   |          |          |          |   |          |          |          |
|----|----------|----------|----------|---|----------|----------|----------|---|----------|----------|----------|---|----------|----------|----------|
| C  | 10.18462 | 4.88371  | -0.06067 | C | -10.1192 | -4.97868 | 0.39021  | C | -10.1273 | -4.98354 | 0.43294  | C | 10.15423 | 4.92479  | 0.18531  |
| H  | 8.7775   | 5.10794  | -1.64241 | H | -8.67108 | -5.21113 | -1.22061 | H | -8.7688  | -5.25871 | -1.17661 | H | 8.8006   | 5.04262  | -1.50481 |
| C  | 10.40727 | 4.4082   | 1.23724  | C | -10.3185 | -4.46538 | 1.68075  | C | -10.3086 | -4.47416 | 1.71795  | C | 10.30493 | 4.52782  | 1.52023  |
| H  | 9.53853  | 3.3517   | 2.8986   | H | -9.42924 | -3.43681 | 3.34847  | H | -9.42207 | -3.39936 | 3.34128  | H | 9.33563  | 3.65568  | 3.2324   |
| O  | 6.59073  | 4.28593  | -0.57035 | O | -6.60605 | -4.15439 | -0.18568 | O | -6.5811  | -4.2524  | -0.25781 | O | 6.66241  | 4.08777  | -0.461   |
| O  | 4.05864  | -6.77537 | -1.0143  | O | -4.05413 | 6.73521  | -0.2564  | O | -4.06276 | 6.87548  | -0.32597 | O | 4.0396   | -6.75604 | -0.28788 |
| C  | 5.39731  | -6.35229 | -0.74326 | C | -5.31116 | 6.45942  | 0.25613  | C | -5.3243  | 6.53922  | 0.28754  | C | 5.30253  | -6.47583 | 0.20901  |
| C  | 5.81968  | -6.03134 | 0.55253  | C | -5.4903  | 5.98818  | 1.559    | C | -5.48198 | 5.99761  | 1.56896  | C | 5.49176  | -6.07813 | 1.53592  |
| C  | 6.30592  | -6.30191 | -1.8059  | C | -6.40548 | 6.76235  | -0.5513  | C | -6.45065 | 6.8135   | -0.50003 | C | 6.3869   | -6.70003 | -0.63399 |
| C  | 7.18464  | -5.81979 | 0.80268  | C | -6.78725 | 5.81115  | 2.04547  | C | -6.77744 | 5.79747  | 2.06899  | C | 6.78931  | -5.89453 | 2.01529  |
| H  | 5.10863  | -5.95301 | 1.3476   | H | -4.6268  | 5.77035  | 2.17946  | H | -4.62189 | 5.73797  | 2.14697  | H | 4.63207  | -5.92155 | 2.17982  |
| C  | 7.67337  | -6.15608 | -1.54282 | C | -7.7056  | 6.59218  | -0.0561  | C | -7.72423 | 6.57926  | -0.02352 | C | 7.6856   | -6.52168 | -0.13974 |
| H  | 5.95847  | -6.41043 | -2.81281 | H | -6.21773 | 7.13293  | -1.55298 | H | -6.3231  | 7.18901  | -1.50118 | H | 6.21493  | -7.01598 | -1.65588 |
| C  | 8.11756  | -5.95701 | -0.23543 | C | -7.88872 | 6.10972  | 1.24836  | C | -7.88948 | 6.11747  | 1.28421  | C | 7.88634  | -6.11475 | 1.18505  |
| H  | 7.51516  | -5.55547 | 1.7845   | H | -6.93158 | 5.44582  | 3.05831  | H | -6.9146  | 5.41975  | 3.05993  | H | 6.94056  | -5.58692 | 3.0458   |
| H  | 1.54053  | -7.36477 | -0.88054 | H | -1.62064 | 7.40622  | -0.20663 | H | -1.53258 | 7.41051  | -0.07957 | H | 1.61781  | -7.42265 | -0.38929 |
| Co | -0.0061  | 0.02985  | -0.37216 | H | 11.25188 | 4.638    | 2.17285  | H | 11.21042 | 4.6362   | 2.23402  | H | -11.2731 | -4.69577 | 1.96519  |
| H  | -11.2835 | -4.71916 | 1.90836  | H | 8.9031   | -5.99156 | -1.87375 | H | 8.87192  | -5.99973 | -1.93993 | H | -9.01998 | 5.94562  | -1.65781 |
| H  | -9.17539 | 5.93551  | -0.8831  | H | -11.2944 | -4.58396 | 2.13852  | H | -11.2603 | -4.56043 | 2.18943  | H | 11.26291 | 4.6764   | 2.00601  |
| H  | 11.3672  | 4.52477  | 1.6965   | H | -8.9022  | 5.98206  | 1.61268  | H | -8.87033 | 5.99249  | 1.68033  | H | 8.90148  | -5.98166 | 1.54254  |
| H  | 9.16531  | -5.88913 | -0.03237 | C | 11.26579 | 5.69075  | -0.26591 | C | 11.30195 | 5.6371   | -0.30827 | C | -11.3214 | -5.56759 | -0.53435 |
| C  | -11.2928 | -5.548   | -0.75821 | O | 12.3349  | 5.79967  | 0.3138   | O | 12.44931 | 5.62276  | 0.2119   | O | -12.4101 | -5.74531 | -0.02663 |
| O  | -12.2547 | -6.14576 | -0.21144 | C | -8.92537 | 6.90386  | -0.87663 | C | -8.94273 | 6.83678  | -0.92061 | C | 8.88652  | -6.74834 | -0.9894  |
| C  | 8.68194  | -6.22632 | -2.69765 | O | -10.0416 | 6.72798  | -0.41445 | O | -10.0899 | 6.52427  | -0.51641 | O | 10.03415 | -6.60048 | -0.62101 |
| O  | 9.7448   | -6.89165 | -2.57669 | C | -11.2707 | -5.66528 | -0.28759 | C | -11.3051 | -5.63213 | -0.31987 | C | 11.32826 | 5.53246  | -0.49849 |
| C  | 11.28089 | 5.56025  | -0.89108 | O | -12.351  | -5.7604  | 0.27363  | O | -12.4498 | -5.63352 | 0.1921   | O | 12.41433 | 5.71093  | 0.01475  |
| O  | 12.25429 | 6.13189  | -0.33661 | C | 8.93022  | -6.92167 | 0.61257  | C | 8.94731  | -6.85646 | 0.65395  | C | -8.84298 | 7.08396  | 0.7235   |
| C  | -8.73499 | 6.29107  | 1.78437  | O | 10.0458  | -6.74622 | 0.14863  | O | 10.09444 | -6.54277 | 0.25201  | O | -9.95037 | 7.28722  | 0.28689  |
| O  | -9.78871 | 6.9675   | 1.64567  | C | 11.0847  | 6.24824  | -1.66781 | C | 11.0928  | 6.26886  | -1.70389 | H | -7.54374 | 7.36393  | 2.20641  |

|   |          |          |          |    |          |          |          |    |          |          |          |    |          |          |          |
|---|----------|----------|----------|----|----------|----------|----------|----|----------|----------|----------|----|----------|----------|----------|
| C | -11.2063 | -5.42496 | -2.29224 | C  | -11.068  | -6.23954 | -1.67972 | C  | -11.0847 | -6.25603 | -1.71796 | H  | 9.36016  | -7.76903 | -2.62912 |
| C | 11.15854 | 5.51734  | -2.42652 | C  | -8.74493 | 7.4407   | -2.28627 | C  | -8.75205 | 7.45058  | -2.32647 | H  | 11.972   | 5.80785  | -2.36016 |
| C | 8.38828  | -5.45988 | -3.99386 | C  | 8.75194  | -7.46363 | 2.02056  | C  | 8.75871  | -7.47416 | 2.06056  | H  | -11.9535 | -5.85454 | -2.3983  |
| C | -8.47367 | 5.51846  | 3.08361  | H  | 10.28205 | 6.99489  | -1.69487 | H  | 10.15152 | 6.79129  | -1.73191 | Mn | -0.00063 | -0.01128 | 0.21472  |
| H | -10.5526 | -6.17342 | -2.68389 | H  | 12.02092 | 6.71215  | -1.98237 | H  | 11.89715 | 6.95414  | -1.92392 | Cl | -0.0077  | -0.00357 | 2.398    |
| H | -12.1814 | -5.5453  | -2.71426 | H  | 10.817   | 5.45551  | -2.37667 | H  | 11.08206 | 5.47324  | -2.43363 | C  | 8.5774   | -7.14599 | -2.24962 |
| H | -10.8265 | -4.45317 | -2.5429  | H  | 8.18537  | -8.40248 | 2.01327  | H  | 7.99876  | -8.24146 | 2.02269  | C  | -11.0571 | -5.92214 | -1.81784 |
| H | -7.78723 | 6.04403  | 3.70451  | H  | 9.73763  | -7.6396  | 2.45422  | H  | 9.68965  | -7.91263 | 2.39495  | C  | -8.59547 | 7.24222  | 2.05162  |
| H | -9.40008 | 5.3861   | 3.60428  | H  | 8.20065  | -6.75449 | 2.64974  | H  | 8.45737  | -6.69842 | 2.738    | C  | 11.07238 | 5.88049  | -1.78543 |
| H | -8.06668 | 4.55783  | 2.83003  | H  | -10.7806 | -5.45687 | -2.39204 | H  | -10.9771 | -5.45818 | -2.42843 | H  | 10.33449 | 5.22156  | -2.19314 |
| H | 11.77251 | 4.7213   | -2.8001  | H  | -10.271  | -6.99275 | -1.68351 | H  | -10.1709 | -6.87365 | -1.70485 | H  | 10.70898 | 6.88638  | -1.81737 |
| H | 10.13889 | 5.3378   | -2.70007 | H  | -12.0018 | -6.69958 | -2.00672 | H  | -11.9054 | -6.86539 | -1.9842  | H  | 7.65944  | -7.69557 | -2.23513 |
| H | 11.4821  | 6.44374  | -2.84573 | H  | -9.72995 | 7.61283  | -2.72296 | H  | -9.68268 | 7.88671  | -2.66426 | H  | 8.46889  | -6.2869  | -2.87818 |
| H | 9.30355  | -5.31723 | -4.53112 | H  | -8.18043 | 8.38082  | -2.28128 | H  | -7.99337 | 8.22034  | -2.28933 | H  | -10.3182 | -5.26391 | -2.22478 |
| H | 7.69764  | -5.9958  | -4.60138 | H  | -8.19059 | 6.73032  | -2.91134 | H  | -8.4471  | 6.6736   | -2.99985 | H  | -10.6915 | -6.92743 | -1.8421  |
| H | 7.97361  | -4.50388 | -3.73555 | Ni | 0.00187  | -0.00252 | -0.1259  | Ti | 0.00195  | 0.00838  | 0.13498  | H  | -9.1113  | 8.10855  | 2.40981  |
|   |          |          |          |    |          |          |          | O  | -0.25462 | 0.61366  | 1.72356  | H  | -8.93667 | 6.37868  | 2.58339  |

Table S7. Optimised cartesian coordinates for MPcs **3d**, **4d**, **5d** and **6d**.

| 3d |         |          | 4d       |   |          | 5d       |          |   | 6d       |          |          |   |          |         |          |
|----|---------|----------|----------|---|----------|----------|----------|---|----------|----------|----------|---|----------|---------|----------|
| C  | 3.58712 | 2.15914  | -0.14801 | C | -3.57237 | -2.16799 | -0.18909 | C | -3.64331 | -2.13815 | 0.04349  | C | -3.61676 | 2.22265 | -0.1041  |
| C  | 4.09946 | 0.85134  | -0.13703 | C | -4.08319 | -0.86232 | -0.16975 | C | -4.14476 | -0.82191 | 0.0245   | C | -4.13842 | 0.91438 | -0.12838 |
| C  | 5.47675 | 0.62232  | -0.14059 | C | -5.46035 | -0.63155 | -0.14593 | C | -5.51395 | -0.58234 | -0.11211 | C | -5.51305 | 0.6933  | -0.01895 |
| C  | 6.32748 | 1.72465  | -0.15193 | C | -6.30907 | -1.73331 | -0.13961 | C | -6.3667  | -1.67569 | -0.21613 | C | -6.35043 | 1.79693 | 0.10116  |
| C  | 5.80041 | 3.03358  | -0.15092 | C | -5.78239 | -3.04366 | -0.14785 | C | -5.85343 | -2.99097 | -0.18333 | C | -5.81661 | 3.10434 | 0.11134  |
| C  | 4.42421 | 3.27184  | -0.15164 | C | -4.40893 | -3.28206 | -0.17463 | C | -4.48702 | -3.24154 | -0.06062 | C | -4.44446 | 3.33615 | 0.01666  |
| C  | 2.14297 | 2.02744  | -0.14528 | C | -2.12304 | -2.03854 | -0.21451 | C | -2.19471 | -2.02961 | 0.1745   | C | -2.16802 | 2.09501 | -0.21567 |
| C  | 2.95573 | -0.03144 | -0.128   | C | -2.93662 | 0.02759  | -0.18502 | C | -2.99893 | 0.06473  | 0.14398  | C | -3.0044  | 0.0135  | -0.25427 |

|   |          |          |          |   |          |          |          |   |          |          |          |   |          |          |          |
|---|----------|----------|----------|---|----------|----------|----------|---|----------|----------|----------|---|----------|----------|----------|
| H | 7.4032   | 1.58614  | -0.16843 | H | -7.38514 | -1.59586 | -0.1361  | H | -7.43526 | -1.5277  | -0.32985 | H | -7.42266 | 1.66269  | 0.19576  |
| H | 4.04091  | 4.28602  | -0.1579  | H | -4.02497 | -4.29585 | -0.18786 | H | -4.11238 | -4.25884 | -0.04799 | H | -4.05406 | 4.34735  | 0.0376   |
| N | 1.78154  | 0.69636  | -0.13324 | N | -1.76667 | -0.70512 | -0.21221 | N | -1.85408 | -0.69672 | 0.25029  | N | -1.84623 | 0.75996  | -0.32259 |
| N | 1.33788  | 3.09394  | -0.15388 | N | -1.32192 | -3.08687 | -0.23458 | N | -1.37988 | -3.07593 | 0.16952  | N | -1.33805 | 3.12863  | -0.1694  |
| N | 3.08758  | -1.36273 | -0.1155  | N | -3.06131 | 1.34263  | -0.17295 | N | -3.08733 | 1.38881  | 0.10532  | N | -3.11248 | -1.30937 | -0.2526  |
| C | 2.0393   | -2.14086 | -0.10642 | C | -2.01201 | 2.14372  | -0.18832 | C | -2.04055 | 2.20316  | 0.1227   | C | -2.07716 | -2.13866 | -0.27729 |
| C | 2.165    | -3.60377 | -0.0919  | C | -2.14216 | 3.59347  | -0.17601 | C | -2.14653 | 3.65009  | -0.02742 | C | -2.20617 | -3.5868  | -0.16699 |
| C | 0.86543  | -4.11238 | -0.08401 | C | -0.83782 | 4.10473  | -0.19996 | C | -0.83141 | 4.15107  | -0.02527 | C | -0.89826 | -4.1083  | -0.16607 |
| C | 3.28297  | -4.42639 | -0.07923 | C | -3.26258 | 4.42309  | -0.13957 | C | -3.25478 | 4.48442  | -0.16932 | C | -3.32657 | -4.41008 | -0.06216 |
| C | -0.03446 | -2.96015 | -0.0975  | C | 0.0524   | 2.95917  | -0.22746 | C | 0.05281  | 3.00788  | 0.12561  | C | 0.00464  | -2.97428 | -0.2742  |
| C | 0.63441  | -5.48496 | -0.06153 | C | -0.60967 | 5.48349  | -0.18912 | C | -0.59234 | 5.52108  | -0.16875 | C | -0.67937 | -5.48431 | -0.05776 |
| C | 3.0467   | -5.80927 | -0.06614 | C | -3.02461 | 5.7982   | -0.13796 | C | -3.00212 | 5.84979  | -0.31089 | C | -3.09312 | -5.78103 | 0.04871  |
| H | 4.28593  | -4.01602 | -0.07426 | H | -4.26542 | 4.01381  | -0.10831 | H | -4.26149 | 4.08413  | -0.16337 | H | -4.32894 | -3.99796 | -0.07209 |
| C | 1.74224  | -6.33253 | -0.05526 | C | -1.71447 | 6.32425  | -0.16089 | C | -1.68628 | 6.36355  | -0.30962 | C | -1.78728 | -6.31522 | 0.04883  |
| H | 1.62468  | -7.41115 | -0.04061 | H | -1.60073 | 7.40341  | -0.15352 | H | -1.56018 | 7.43553  | -0.42159 | H | -1.67756 | -7.39142 | 0.13365  |
| N | 0.69862  | -1.77674 | -0.10968 | N | -0.68006 | 1.78738  | -0.21894 | N | -0.70976 | 1.86278  | 0.22845  | N | -0.74033 | -1.81654 | -0.3561  |
| C | 0.0382   | 2.9551   | -0.1525  | C | -0.00682 | -2.96169 | -0.2578  | C | -0.05562 | -2.98647 | 0.19678  | C | -0.01521 | 3.0201   | -0.17909 |
| C | -0.86165 | 4.10737  | -0.16459 | C | 0.88275  | -4.10799 | -0.28037 | C | 0.83047  | -4.13305 | 0.08741  | C | 0.88586  | 4.14969  | -0.02253 |
| C | -2.16124 | 3.5988   | -0.15873 | C | 2.18802  | -3.59647 | -0.29941 | C | 2.14587  | -3.63196 | 0.09406  | C | 2.19359  | 3.62923  | -0.02456 |
| C | -0.6305  | 5.47995  | -0.18584 | C | 0.6523   | -5.48607 | -0.29089 | C | 0.59239  | -5.50511 | -0.03424 | C | 0.66594  | 5.52071  | 0.13764  |
| C | -2.03558 | 2.13585  | -0.14644 | C | 2.05877  | -2.14764 | -0.29118 | C | 2.03783  | -2.18166 | 0.2043   | C | 2.06601  | 2.18421  | -0.17867 |
| C | -3.27915 | 4.42151  | -0.17217 | C | 3.30663  | -4.42884 | -0.32995 | C | 3.25495  | -4.46948 | -0.0179  | C | 3.31295  | 4.44575  | 0.12871  |
| C | -1.73826 | 6.3276   | -0.19274 | C | 1.75675  | -6.32898 | -0.3113  | C | 1.68827  | -6.3518  | -0.13111 | C | 1.77268  | 6.3475   | 0.27615  |
| C | -3.04275 | 5.80437  | -0.18398 | C | 3.06512  | -5.80232 | -0.32816 | C | 3.00384  | -5.83864 | -0.12018 | C | 3.08047  | 5.81517  | 0.26832  |
| H | -4.28215 | 4.01124  | -0.17925 | H | 4.3115   | -4.02342 | -0.35876 | H | 4.26171  | -4.06894 | -0.02659 | H | 4.31344  | 4.02989  | 0.14148  |
| N | -0.69487 | 1.77172  | -0.14193 | N | 0.72595  | -1.79167 | -0.26514 | N | 0.70575  | -1.8391  | 0.28123  | N | 0.7303   | 1.86417  | -0.28587 |
| N | -1.33412 | -3.09898 | -0.09737 | N | 1.36645  | 3.08374  | -0.25456 | N | 1.37743  | 3.09685  | 0.11659  | N | 1.32744  | -3.0838  | -0.24873 |
| N | -3.08384 | 1.35769  | -0.141   | N | 3.10785  | -1.34621 | -0.30746 | N | 3.08504  | -1.36773 | 0.18428  | N | 3.10037  | 1.35464  | -0.16571 |
| C | -2.95202 | 0.02636  | -0.13049 | C | 2.98299  | -0.03158 | -0.3012  | C | 2.99628  | -0.0432  | 0.19061  | C | 2.99231  | 0.03186  | -0.21012 |

|   |          |          |          |   |          |          |          |   |          |          |          |   |          |          |          |
|---|----------|----------|----------|---|----------|----------|----------|---|----------|----------|----------|---|----------|----------|----------|
| C | -4.09568 | -0.85645 | -0.12827 | C | 4.12891  | 0.85933  | -0.32279 | C | 4.14399  | 0.84078  | 0.06901  | C | 4.12501  | -0.87174 | -0.09389 |
| C | -3.58338 | -2.16428 | -0.11544 | C | 3.61593  | 2.1642   | -0.30772 | C | 3.64244  | 2.15695  | 0.04971  | C | 3.60468  | -2.18054 | -0.11979 |
| C | -5.4729  | -0.62775 | -0.1422  | C | 5.50656  | 0.62855  | -0.35854 | C | 5.51513  | 0.59844  | -0.04019 | C | 5.49712  | -0.65252 | 0.04695  |
| C | -2.13922 | -2.0325  | -0.11009 | C | 2.16776  | 2.03406  | -0.27675 | C | 2.19185  | 2.05113  | 0.15989  | C | 2.15789  | -2.05023 | -0.25073 |
| C | -4.42038 | -3.27688 | -0.10517 | C | 4.4528   | 3.27981  | -0.31626 | C | 4.48783  | 3.25785  | -0.06597 | C | 4.432    | -3.29644 | -0.01972 |
| C | -6.32371 | -1.73013 | -0.14028 | C | 6.35319  | 1.7314   | -0.37632 | C | 6.36963  | 1.68934  | -0.15528 | C | 6.33385  | -1.75855 | 0.14705  |
| C | -5.79673 | -3.03886 | -0.11578 | C | 5.82363  | 3.03987  | -0.34889 | C | 5.85605  | 3.00486  | -0.1607  | C | 5.80184  | -3.06612 | 0.10638  |
| H | -7.39923 | -1.59158 | -0.16497 | H | 7.42933  | 1.59863  | -0.41969 | H | 7.43985  | 1.53905  | -0.24861 | H | 7.40395  | -1.62629 | 0.26558  |
| N | -1.7778  | -0.70142 | -0.1206  | N | 1.81261  | 0.70153  | -0.27424 | N | 1.84994  | 0.72026  | 0.26122  | N | 1.83653  | -0.71178 | -0.32059 |
| H | -4.03707 | -4.29101 | -0.0935  | H | 4.06724  | 4.29303  | -0.30425 | H | 4.11319  | 4.27509  | -0.08264 | H | 4.04311  | -4.30829 | -0.03732 |
| H | 0.37985  | 5.87583  | -0.19209 | H | -0.35781 | -5.88236 | -0.27865 | H | -0.42047 | -5.89445 | -0.04536 | H | -0.34112 | 5.92481  | 0.14642  |
| H | 5.87256  | -0.38831 | -0.14419 | H | -5.8553  | 0.37932  | -0.1426  | H | -5.89937 | 0.43177  | -0.1423  | H | -5.91474 | -0.31491 | -0.02121 |
| H | -0.3759  | -5.88091 | -0.05427 | H | 0.3996   | 5.88181  | -0.2066  | H | 0.42027  | 5.91121  | -0.17114 | H | 0.32779  | -5.88814 | -0.0539  |
| H | -5.86877 | 0.38262  | -0.16442 | H | 5.90147  | -0.38198 | -0.38317 | H | 5.90079  | -0.41602 | -0.04152 | H | 5.89689  | 0.35574  | 0.0846   |
| C | 5.31431  | -6.46547 | -0.5099  | C | -5.30709 | 6.45782  | -0.49457 | C | -5.27684 | 6.44748  | -0.79438 | C | -5.32138 | -6.42638 | 0.68516  |
| C | 6.40996  | -6.77341 | 0.29384  | C | -6.35966 | 6.76598  | 0.36308  | C | -6.32196 | 6.81084  | 0.05147  | C | -6.45928 | -6.91691 | 0.04524  |
| C | 5.49132  | -5.99068 | -1.81178 | C | -5.54976 | 5.97569  | -1.78464 | C | -5.52831 | 5.83609  | -2.02468 | C | -5.42406 | -5.76762 | 1.91337  |
| C | 7.70924  | -6.60456 | -0.20399 | C | -7.67732 | 6.58734  | -0.07725 | C | -7.64717 | 6.55919  | -0.33084 | C | -7.71816 | -6.7507  | 0.6366   |
| H | 6.22384  | -7.14675 | 1.2948   | H | -6.14721 | 7.14573  | 1.35519  | H | -6.07886 | 7.29112  | 0.99286  | H | -6.31978 | -7.46394 | -0.88317 |
| C | 6.78749  | -5.81487 | -2.30081 | C | -6.8662  | 5.79231  | -2.20969 | C | -6.84884 | 5.57856  | -2.39854 | C | -6.68185 | -5.60609 | 2.49644  |
| H | 4.62691  | -5.76896 | -2.42956 | H | -4.71601 | 5.75381  | -2.44315 | H | -4.70032 | 5.57301  | -2.67542 | H | -4.5311  | -5.39938 | 2.40726  |
| C | 7.89025  | -6.11828 | -1.50734 | C | -7.9308  | 6.09571  | -1.36381 | C | -7.9023  | 5.93579  | -1.56121 | C | -7.82493 | -6.09985 | 1.8721   |
| H | 6.93009  | -5.44654 | -3.31279 | H | -7.05769 | 5.41925  | -3.21158 | H | -7.05053 | 5.10419  | -3.35479 | H | -6.76342 | -5.09999 | 3.45401  |
| O | 4.05819  | -6.74004 | 0.00551  | O | -4.0268  | 6.73934  | -0.0509  | O | -3.99213 | 6.80023  | -0.41108 | O | -4.10863 | -6.7143  | 0.09146  |
| C | 7.82491  | 4.19627  | 0.42607  | C | -7.79206 | -4.20185 | 0.47952  | C | -7.93444 | -4.13094 | 0.19473  | C | -7.87761 | 4.2817   | -0.25737 |
| C | 7.99697  | 3.71154  | 1.72541  | C | -7.91668 | -3.73231 | 1.7911   | C | -8.2077  | -3.67639 | 1.48737  | C | -8.14213 | 3.87257  | -1.56823 |
| C | 8.86897  | 4.84046  | -0.23716 | C | -8.86214 | -4.82574 | -0.15885 | C | -8.92968 | -4.73198 | -0.57469 | C | -8.87347 | 4.86437  | 0.52327  |
| C | 9.23593  | 3.86765  | 2.35123  | C | -9.13352 | -3.88203 | 2.45846  | C | -9.49937 | -3.81869 | 1.99954  | C | -9.4253  | 4.04078  | -2.09123 |
| H | 7.17275  | 3.22513  | 2.23683  | H | -7.07009 | -3.26153 | 2.28026  | H | -7.42044 | -3.22408 | 2.08176  | H | -7.35136 | 3.43446  | -2.16866 |

|    |          |          |          |   |          |          |          |   |          |          |          |   |          |          |          |
|----|----------|----------|----------|---|----------|----------|----------|---|----------|----------|----------|---|----------|----------|----------|
| C  | 10.10673 | 5.00366  | 0.39841  | C | -10.0745 | -4.97882 | 0.52411  | C | -10.2212 | -4.88207 | -0.05262 | C | -10.154  | 5.03702  | -0.01571 |
| H  | 8.68736  | 5.20643  | -1.24172 | H | -8.74037 | -5.18803 | -1.17253 | H | -8.67064 | -5.07639 | -1.56969 | H | -8.64349 | 5.18128  | 1.53335  |
| C  | 10.28555 | 4.50703  | 1.69846  | C | -10.2129 | -4.502   | 1.83397  | C | -10.5015 | -4.41604 | 1.24074  | C | -10.4325 | 4.62077  | -1.32386 |
| H  | 9.37251  | 3.49177  | 3.36141  | H | -9.2315  | -3.518   | 3.47712  | H | -9.71485 | -3.46619 | 3.0043   | H | -9.6321  | 3.72398  | -3.10933 |
| O  | 6.61151  | 4.14709  | -0.23403 | O | -6.59866 | -4.15399 | -0.21568 | O | -6.66485 | -4.09219 | -0.35418 | O | -6.61232 | 4.21375  | 0.29739  |
| C  | -7.83255 | -4.18716 | 0.45098  | C | 7.76942  | 4.26379  | 0.34715  | C | 7.93109  | 4.15386  | 0.22387  | C | 7.8692   | -4.22979 | -0.26759 |
| C  | -8.02516 | -3.68571 | 1.74105  | C | 7.85069  | 3.7445   | 1.64228  | C | 8.18497  | 3.72783  | 1.53011  | C | 8.15101  | -3.78022 | -1.5615  |
| C  | -8.86861 | -4.83182 | -0.22404 | C | 8.82631  | 5.00399  | -0.18612 | C | 8.93753  | 4.73902  | -0.54322 | C | 8.85524  | -4.83504 | 0.50835  |
| C  | -9.27656 | -3.82558 | 2.3455   | C | 9.01197  | 3.95347  | 2.38891  | C | 9.46866  | 3.88244  | 2.05857  | C | 9.44142  | -3.93085 | -2.07182 |
| H  | -7.2069  | -3.19898 | 2.2617   | H | 7.0189   | 3.1847   | 2.05613  | H | 7.38897  | 3.28801  | 2.12224  | H | 7.36791  | -3.32447 | -2.15883 |
| C  | -10.1192 | -4.97868 | 0.39021  | C | 9.97876  | 5.2249   | 0.57706  | C | 10.22083 | 4.90167  | -0.00502 | C | 10.14333 | -4.98948 | -0.01807 |
| H  | -8.67108 | -5.21113 | -1.22061 | H | 8.73006  | 5.35541  | -1.20973 | H | 8.6934   | 5.06141  | -1.54931 | H | 8.61198  | -5.18289 | 1.50505  |
| C  | -10.3185 | -4.46538 | 1.68075  | C | 10.0772  | 4.68036  | 1.86406  | C | 10.48182 | 4.46409  | 1.30225  | C | 10.43901 | -4.53291 | -1.3089  |
| H  | -9.42924 | -3.43681 | 3.34847  | H | 9.07761  | 3.54593  | 3.39367  | H | 9.66905  | 3.55213  | 3.07395  | H | 9.6616   | -3.58273 | -3.0768  |
| O  | -6.60605 | -4.15439 | -0.18568 | O | 6.65056  | 4.14582  | -0.44825 | O | 6.67008  | 4.10223  | -0.34334 | O | 6.59643  | -4.17983 | 0.27154  |
| O  | -4.05413 | 6.73521  | -0.2564  | O | 4.07817  | -6.7383  | -0.42057 | O | 3.99525  | -6.78018 | -0.27825 | O | 4.08364  | 6.7354   | 0.46833  |
| C  | -5.31116 | 6.45942  | 0.25613  | C | 5.29956  | -6.52549 | 0.18421  | C | 5.28739  | -6.5303  | 0.15573  | C | 5.3742   | 6.4844   | 0.03235  |
| C  | -5.4903  | 5.98818  | 1.559    | C | 5.42338  | -6.0062  | 1.47602  | C | 5.55959  | -6.15102 | 1.47234  | C | 5.64519  | 6.14111  | -1.29571 |
| C  | -6.40548 | 6.76235  | -0.5513  | C | 6.42777  | -6.93425 | -0.52701 | C | 6.32021  | -6.76556 | -0.74888 | C | 6.40578  | 6.68098  | 0.94599  |
| C  | -6.78725 | 5.81115  | 2.04547  | C | 6.69348  | -5.87744 | 2.04017  | C | 6.8879   | -5.99679 | 1.87438  | C | 6.9702   | 5.98338  | -1.70394 |
| H  | -4.6268  | 5.77035  | 2.17946  | H | 4.53754  | -5.70601 | 2.02571  | H | 4.74262  | -5.98499 | 2.16733  | H | 4.82684  | 6.00514  | -1.99557 |
| C  | -7.7056  | 6.59218  | -0.0561  | C | 7.69724  | -6.81924 | 0.0537   | C | 7.65285  | -6.6192  | -0.33904 | C | 7.73267  | 6.52953  | 0.52302  |
| H  | -6.21773 | 7.13293  | -1.55298 | H | 6.28291  | -7.29935 | -1.54003 | H | 6.06102  | -7.06615 | -1.75802 | H | 6.17118  | 6.95446  | 1.96767  |
| C  | -7.88872 | 6.10972  | 1.24836  | C | 7.82892  | -6.27099 | 1.3356   | C | 7.92897  | -6.22817 | 0.97943  | C | 8.01474  | 6.17607  | -0.80234 |
| H  | -6.93158 | 5.44582  | 3.05831  | H | 6.79197  | -5.47057 | 3.04245  | H | 7.10487  | -5.7027  | 2.89738  | H | 7.18418  | 5.71773  | -2.73503 |
| H  | -1.62064 | 7.40622  | -0.20663 | H | 1.64135  | -7.40796 | -0.31753 | H | 1.56327  | -7.42617 | -0.21879 | H | 1.66214  | 7.4204   | 0.39527  |
| Co | 0.00187  | -0.00252 | -0.1259  | H | -11.1636 | -4.62846 | 2.33999  | H | -11.5078 | -4.53743 | 1.62615  | H | -11.4332 | 4.76274  | -1.71672 |
| H  | 11.25188 | 4.638    | 2.17285  | H | -8.95969 | 5.9635   | -1.67982 | H | -8.93375 | 5.7471   | -1.83838 | H | -8.80569 | -5.99532 | 2.32253  |
| H  | 8.9031   | -5.99156 | -1.87375 | H | 10.98749 | 4.84108  | 2.43071  | H | 11.48214 | 4.59475  | 1.70006  | H | 11.44515 | -4.66159 | -1.69219 |

|   |          |          |          |    |          |          |          |    |          |          |          |    |          |          |          |
|---|----------|----------|----------|----|----------|----------|----------|----|----------|----------|----------|----|----------|----------|----------|
| H | -11.2944 | -4.58396 | 2.13852  | H  | 8.82186  | -6.16767 | 1.75887  | H  | 8.96595  | -6.11723 | 1.277    | H  | 9.05016  | 6.06234  | -1.10391 |
| H | -8.9022  | 5.98206  | 1.61268  | C  | -11.251  | -5.63705 | -0.10649 | C  | -11.3325 | -5.524   | -0.834   | C  | -11.2572 | 5.65488  | 0.76963  |
| C | 11.26579 | 5.69075  | -0.26591 | O  | -12.3293 | -5.79251 | 0.4302   | O  | -12.4486 | -5.62718 | -0.35007 | O  | -12.3873 | 5.82805  | 0.36022  |
| O | 12.3349  | 5.79967  | 0.3138   | C  | 8.95078  | -7.22855 | -0.66429 | C  | 8.81011  | -6.86091 | -1.26652 | C  | 8.87925  | 6.7284   | 1.45102  |
| C | -8.92537 | 6.90386  | -0.87663 | O  | 10.04205 | -6.78688 | -0.39524 | O  | 9.95663  | -6.70551 | -0.87676 | O  | 10.04786 | 6.6005   | 1.14657  |
| O | -10.0416 | 6.72798  | -0.41445 | C  | 11.15236 | 6.00296  | 0.0557   | C  | 11.34352 | 5.5275   | -0.78324 | C  | 11.23682 | -5.6296  | 0.76296  |
| C | -11.2707 | -5.66528 | -0.28759 | O  | 12.27231 | 5.8841   | 0.49163  | O  | 12.45226 | 5.64162  | -0.28502 | O  | 12.37286 | -5.788   | 0.36417  |
| O | -12.351  | -5.7604  | 0.27363  | C  | -8.84408 | 6.90147  | 0.79168  | C  | -8.81832 | 6.92867  | 0.53541  | C  | -8.98041 | -7.26917 | 0.00954  |
| C | 8.93022  | -6.92167 | 0.61257  | O  | -10.0065 | 6.75574  | 0.47152  | O  | -9.9567  | 6.67436  | 0.17506  | O  | -9.99051 | -7.48163 | 0.63636  |
| O | 10.0458  | -6.74622 | 0.14863  | O  | 8.81279  | -8.14418 | -1.66119 | H  | -7.94501 | 6.9976   | 2.52081  | H  | -8.13667 | -7.13682 | -1.71658 |
| O | -8.75552 | 7.40919  | -2.20354 | O  | 10.90524 | 6.87754  | -0.95715 | H  | 9.47905  | -7.42945 | -3.21311 | H  | 9.31691  | 7.17802  | 3.21644  |
| O | -11.0799 | -6.20572 | -1.59771 | O  | -8.48516 | 7.37928  | 2.01035  | Ti | -0.00692 | 0.01952  | 0.92117  | O  | 10.84213 | -6.03316 | 1.99746  |
| O | 8.76241  | -7.43181 | 1.9379   | O  | -11.0073 | -6.0616  | -1.37262 | O  | -0.01797 | 0.03663  | 2.53221  | H  | 11.63067 | -6.43279 | 2.40892  |
| O | 11.09537 | 6.2154   | -1.58522 | H  | 7.91684  | -8.51833 | -1.64908 | O  | 11.09066 | 5.98689  | -2.11363 | O  | -8.95094 | -7.49875 | -1.33113 |
| H | -7.81882 | 7.48401  | -2.40001 | H  | 9.948    | 6.97624  | -1.0865  | H  | 11.84743 | 6.48597  | -2.42958 | O  | 8.49306  | 7.07497  | 2.7051   |
| H | -10.1402 | -6.2806  | -1.77924 | H  | -11.8379 | -6.47106 | -1.67783 | O  | -8.56029 | 7.62227  | 1.86206  | O  | -10.879  | 6.0189   | 2.02149  |
| H | 11.95588 | 6.37266  | -1.98069 | H  | -9.32043 | 7.54868  | 2.4841   | O  | 8.52839  | -7.30118 | -2.69309 | H  | -11.6725 | 6.40728  | 2.43425  |
| H | 9.6237   | -7.58412 | 2.3336   | Ni | 0.02291  | -0.00199 | -0.2429  | O  | -11.0603 | -6.01161 | -2.15045 | Mn | 0.00006  | 0.03522  | -0.98711 |
|   |          |          |          |    |          |          |          | H  | -11.8127 | -6.51685 | -2.467   | Cl | 0.01472  | 0.07065  | -3.14676 |

**(g) TGA – Tabulated degradation profiles and curves**Table S8. TGA of MPC complexes (**3a-3d**, **4a-4d**, **5a-5d** and **6a-6d**).

| Metal | Subs. | Weight loss            |                         |                         |                                      |
|-------|-------|------------------------|-------------------------|-------------------------|--------------------------------------|
|       |       | Stage I                | Stage II                | Stage III               | Major decomposition temperature (°C) |
| Co    | a     | 10%<br>(50 °C - 400°C) | 75%<br>(400 °C - 800°C) | 92%<br>(800 °C - 900°C) | 400                                  |
|       | b     | 10%<br>(50 °C - 400°C) | 80%<br>(400 °C - 637°C) | 79%<br>(637 °C - 900°C) | 400                                  |
|       | c     | 10%<br>(50 °C - 400°C) | 85%<br>(400 °C - 800°C) | 92%<br>(800 °C - 900°C) | 400                                  |
|       | d     | 10%<br>(50 °C - 400°C) | 68%<br>(400 °C - 670°C) | 98%<br>(525 °C - 900°C) | 325                                  |
| Ni    | a     | 8%<br>(50 °C - 365°C)  | 80%<br>(365 °C - 680°C) | 80%<br>(680 °C - 900°C) | 365                                  |
|       | b     | 3%<br>(50 °C - 335°C)  | 79%<br>(335 °C - 635°C) | 80%<br>(635 °C - 900°C) | 335                                  |
|       | c     | 7%<br>(50 °C - 350°C)  | 88%<br>(350 °C - 720°C) | 88%<br>(720 °C - 900°C) | 350                                  |
|       | d     | 3%<br>(50 °C - 350°C)  | 83%<br>(350 °C - 550°C) | 83%<br>(550 °C - 900°C) | 320                                  |
| Ti    | a     | 5%<br>(50 °C - 275°C)  | 98%<br>(275 °C - 700°C) | 98%<br>(700 °C - 900°C) | 275                                  |
|       | b     | 5%<br>(50 °C - 400°C)  | 90%<br>(340 °C - 700°C) | 90%<br>(700 °C - 900°C) | 340                                  |
|       | c     | 7%<br>(50 °C - 265°C)  | 95%<br>(265 °C - 785°C) | 95%<br>(785 °C - 900°C) | 265                                  |
|       | d     | 3%<br>(50 °C - 250°C)  | 90%<br>(250 °C - 700°C) | 90%<br>(700 °C - 900°C) | 250                                  |
| Mn    | a     | 1%<br>(50 °C - 350°C)  | 89%<br>(350 °C - 850°C) | 89%<br>(850 °C - 900°C) | 350                                  |
|       | b     | 3%<br>(50 °C - 315°C)  | 90%<br>(315 °C - 780°C) | 90%<br>(780 °C - 900°C) | 315                                  |
|       | c     | 5%<br>(50 °C - 300°C)  | 80%<br>(300 °C - 570°C) | 83%<br>(570 °C - 900°C) | 300                                  |
|       | d     | 5%<br>(50 °C - 320°C)  | 98%<br>(320 °C - 630°C) | 98%<br>(630 °C - 900°C) | 320                                  |



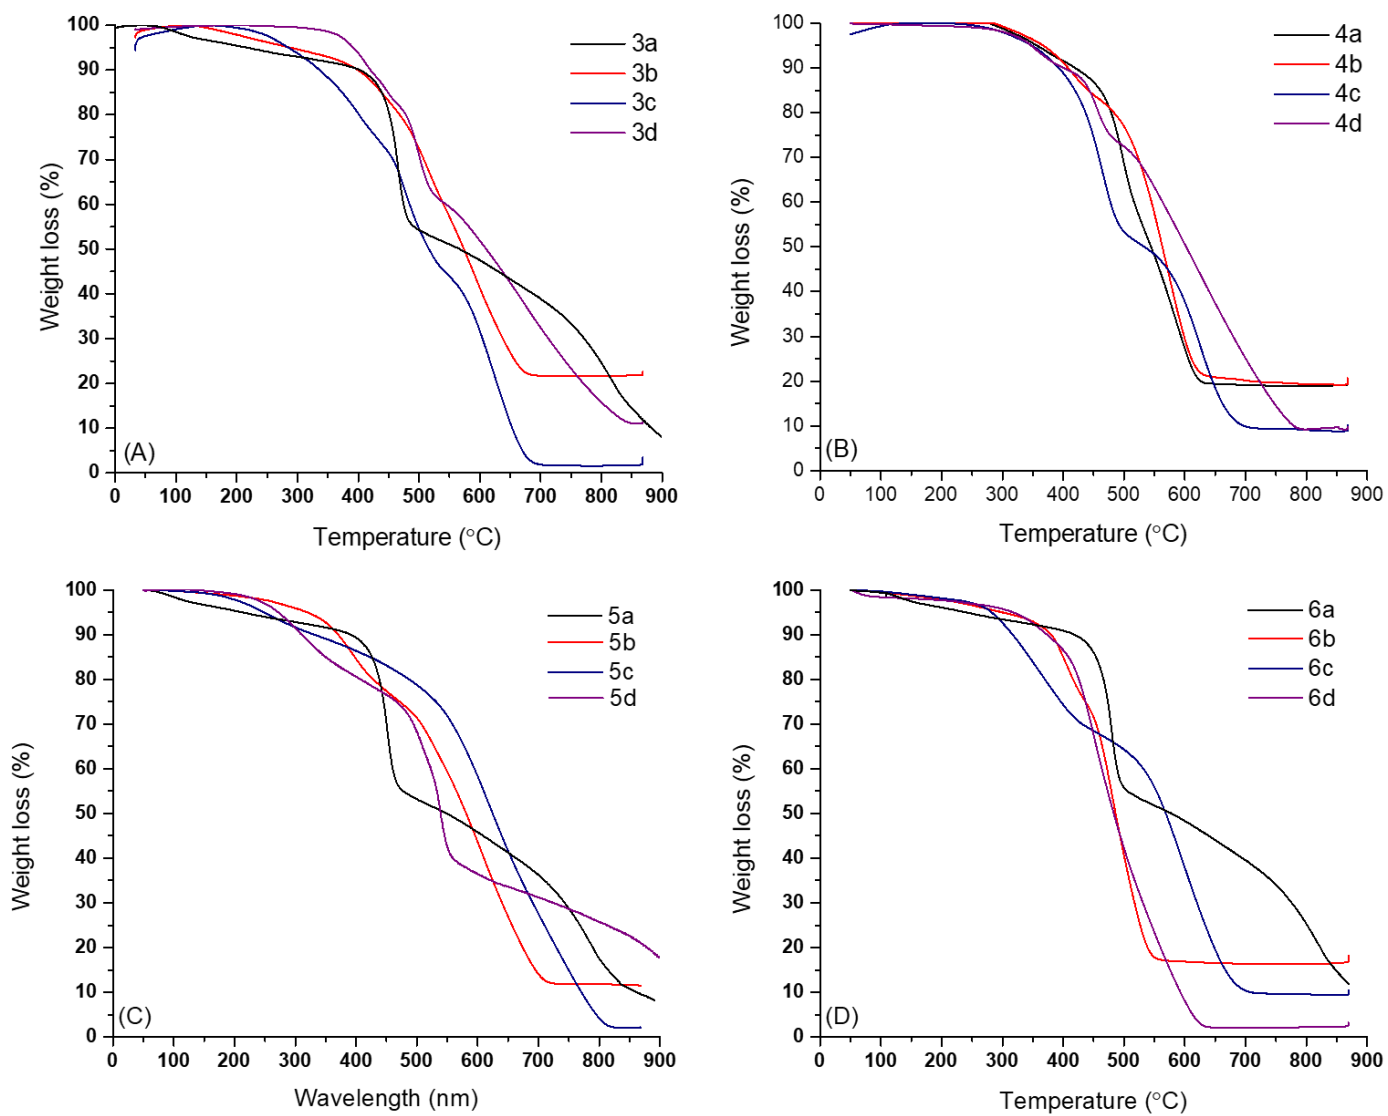

Figure S21. Thermogravimetric curves for the MPC complexes (3a-3d, 4a-4d, 5a-5d and 6a-6d).

## (h) Bulk heterojunction solar cell fabrication

The BHJ cells in this work were constructed in a typical inverted configuration as follows:

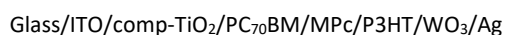

In the inverted configuration, the photogenerated electrons are collected through the  $\text{TiO}_2$  layer towards the ITO while the holes are collected through the  $\text{WO}_3$  layer towards the Ag anode. The respective top and side views of the inverted BHJ cells can be viewed in Figure S22. The OSCs were fabricated on pre-cut 14 x 14 mm ITO coated glass substrates. The ITO substrates were chemically etched to remove an  $\sim 3$  mm strip of ITO to reveal the underlying glass.

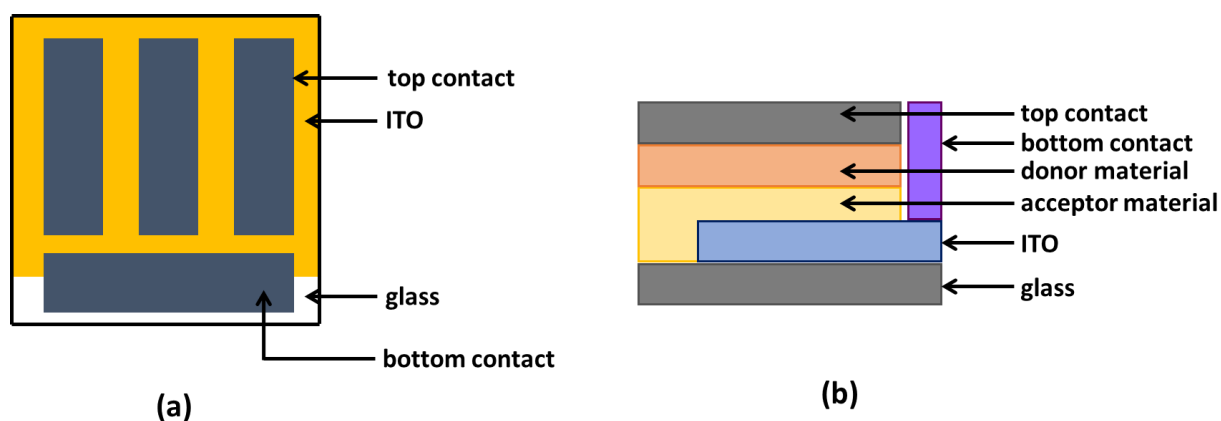

Figure S22. Top view (a) and side view (b) of the fabricated inverted BHJ OSC.

The top view shows the top and bottom contacts. Each top contact represents an individual cell or “pixel” with an active area of  $0.133 \text{ cm}^2$ . The single bottom contact lies perpendicular to the top contacts and functions the same for all three pixels. When illuminated, only the active cell area is exposed to the incoming light while the rest of the device is covered with a mask.

- *Cleaning and cutting of ITO substrates*

Commercially available ITO coated glass substrates were pre-cut into four 14 mm x 56 mm pieces and fitted onto a mask. Approximately 3 mm of the ITO length was left exposed for etching whilst the remainder of the ITO was protected by Kapton tape. The ITO substrates were chemically etched using a 2M HCl solution and Zn powder. Once etched, the ITO substrates were cut further into 14 mm x 14 mm pieces and subjected to several 5-minute cleaning cycles in an ultrasonic bath with neutral detergent, deionised water, acetone and finally IPA. The substrates were dried under a stream of  $\text{N}_2$  flow and after that exposed to oxygen plasma treatment for 7-minutes to remove organic residue.

- *Spin coating of the ETL*

In an N<sub>2</sub> filled glove box, a compact TiO<sub>2</sub> layer was spin-coated (50 µL, 5000 rpm; 2000 m s<sup>-2</sup> acceleration; 30 seconds) onto the ITO substrates. The TiO<sub>2</sub> coated ITO substrates were then annealed using the following temperature profile: 15-minute ramp to 450°C; 15-minute hold at 450°C; cool to 120 °C in 120 minutes.

- *Preparation and spin coating of the ternary blend photoactive layer*

Individual P3HT (30.0 mg L<sup>-1</sup>), PC<sub>70</sub>BM (24.0 mg mL<sup>-1</sup>) and MPc (10 mg mL<sup>-1</sup>) solutions were prepared in chlorobenzene with stirring at 70 °C for 60 minutes in sealed vessels. The binary blend was prepared by combining the heated P3HT and PC<sub>70</sub>BM solutions in a 1:1.2 ratio. For the optimisation studies, MPcs **3a**, **5a** and **6a** were added to the binary blend in various ratios as specified in Table S9 to form the ternary blend.

Table S9: Varying ratios of MPc for optimisation in the P3HT:PC<sub>70</sub>BM active layer.

| Sample    | Blend ratio |                     |      |
|-----------|-------------|---------------------|------|
|           | P3HT        | PC <sub>70</sub> BM | MPc  |
| Reference | 1           | 1.2                 | 0    |
| 5 wt%     | 1           | 1.2                 | 0.05 |
| 10 wt%    | 1           | 1.2                 | 0.10 |
| 15 wt%    | 1           | 1.2                 | 0.15 |

The ternary blends were allowed to stir at 70 °C for 30 minutes in sealed vessels. The triple blended active layer (30 µL) was deposited onto pre-heated TiO<sub>2</sub> coated ITO substrates *via* spin coating (800 rpm; 500 m s<sup>-2</sup> acceleration; 120 seconds).

- *Thermal evaporation of HTM and anode*

Prior to the thermal deposition, the OSCs were fitted into a metal holder and covered with a shadow mask. Under vacuum conditions, a 3 nm WO<sub>3</sub> HTM layer followed by a 100 nm Ag layer was thermally evaporated onto the active layer, respectively. The OSCs were subjected to a final annealing step at 110 °C for 10 minutes.

- *Current-Voltage (IV-) characterization*

Standard test conditions (100 mW cm<sup>2</sup> under air mass, AM 1.5 global at 289 K) were applied during the measurements. The solar cells were placed into a sample holder designed to connect the bottom and top electrodes of the device to the source meter *via* gold pins. A Keithley 2400 source meter swept the bias voltage (V) from -0.1 V to 0.8 V and simultaneously monitored the corresponding current (I). A 10mV voltage step size was used and the acquisition time for one data point was set at 10 ms. A 150W Xe-lamp in a LOT Oriel solar simulator was used to simulate the AM 1.5 global standard conditions. To meet these conditions, the setup was calibrated with a certified silicon solar cell (Fraunhofer ISE WPVS Cell) equipped with a KG5 bandpass filter. The filters can reduce errors associated with the spectral mismatch between silicon and organic photovoltaic devices.

- *External quantum efficiency (EQE) characterization*

During EQE measurements, the solar cells were kept at short circuit conditions and corresponding  $I_{sc}$  were measured using a Keithley 2400 source meter. The illumination wavelength was swept from 350 nm to 950 nm in 2 nm steps. A 150W Xe-lamp in a LOT-Oriel Omni 150 monochromator equipped with a 150 nm grating, focused the monochromatic light beam onto the active cell area. A motorized filter wheel with a series of cut-off filters intersected the beam path to minimize sample radiation caused by second harmonics passing the grating monochromator. A motorized translation stage (Thorlabs PT1-Z7) was used to measure three pixels simultaneously. The incident light intensity for these measurements were calibrated with a certified silicon reference solar cell (ISE WPVS Cell, Fraunhofer Institute) with the respective KG5 filter.

(i) UV-vis spectroscopy: Optimisation of MPc concentration

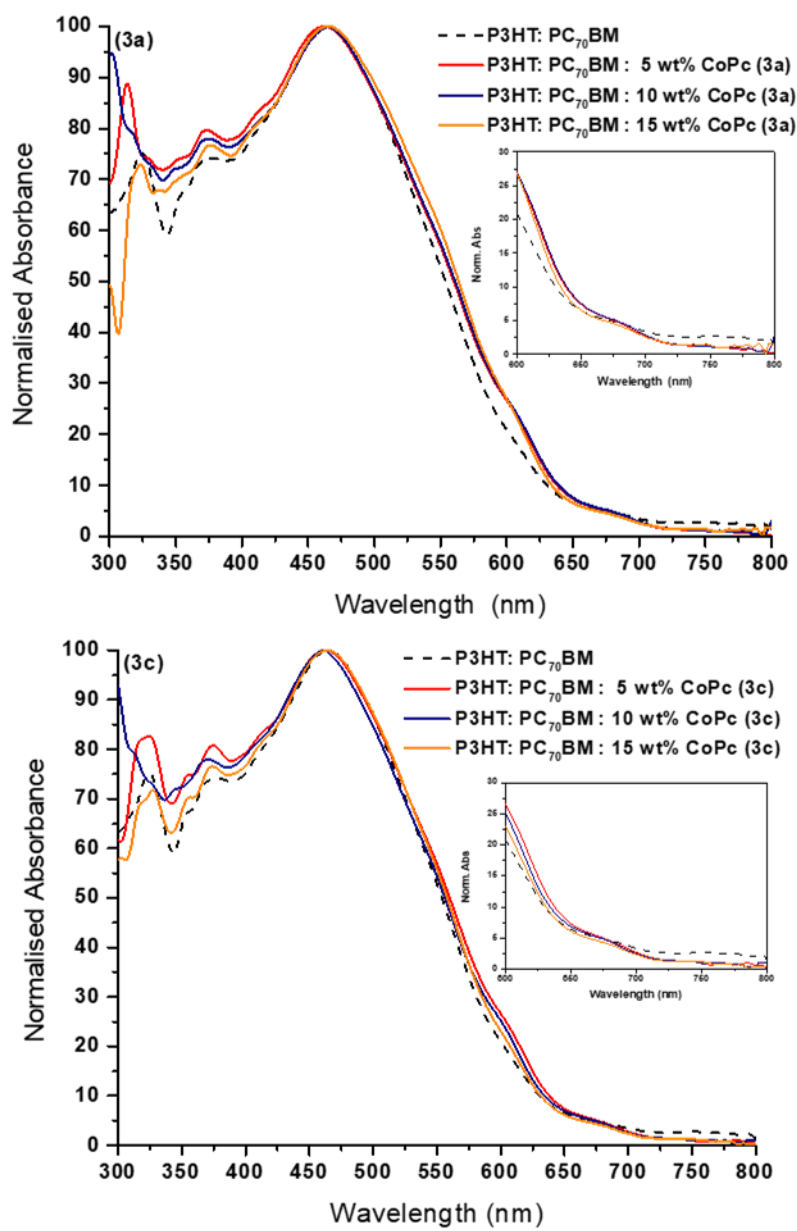

Figure S23. UV-vis spectra of CoPc complexes (3a and 3c) for optimisation studies.

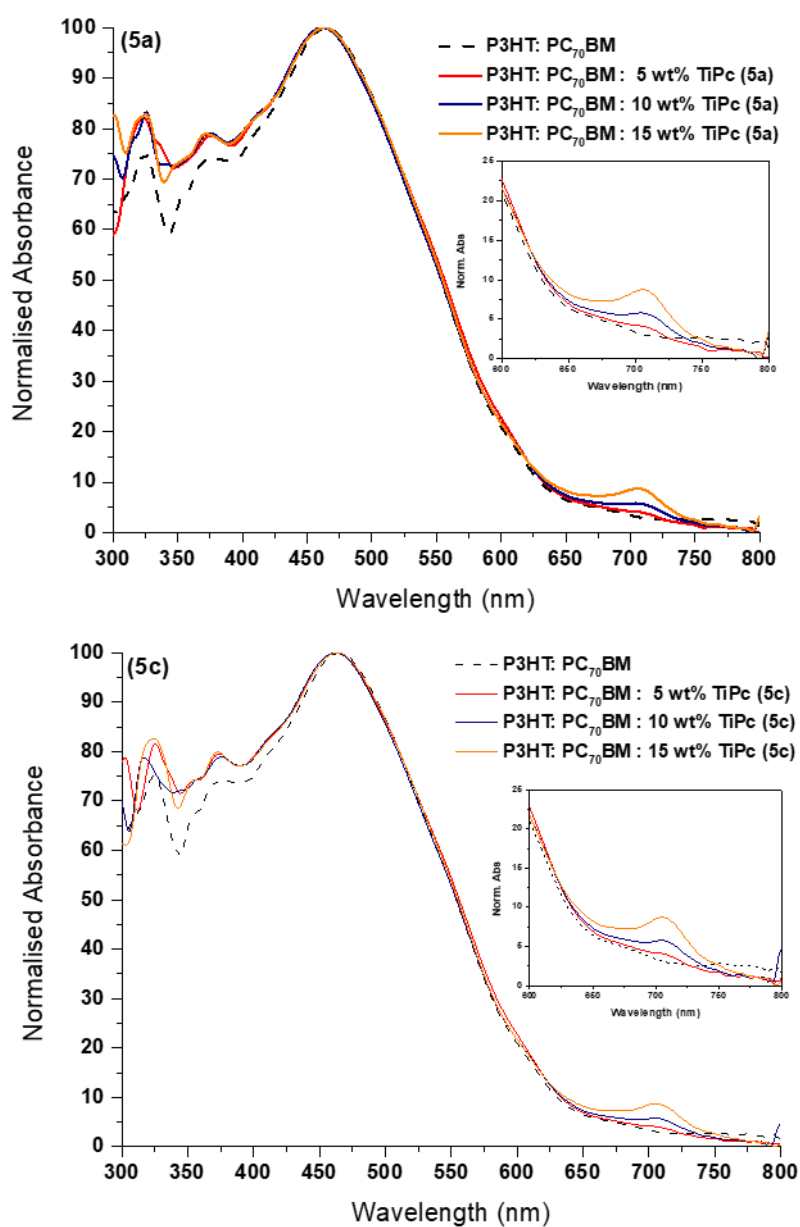

Figure S24. UV-vis spectra of TiPc complexes (5a and 5c) for optimisation studies.

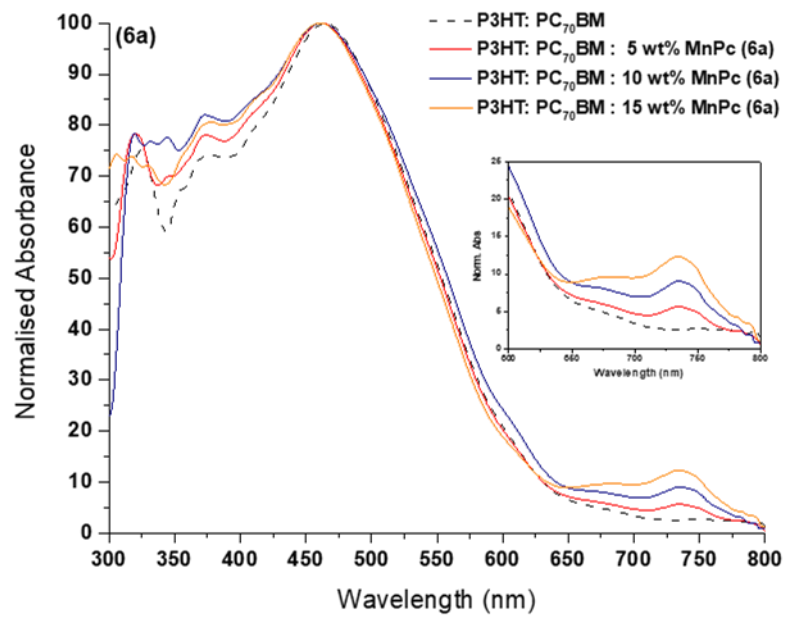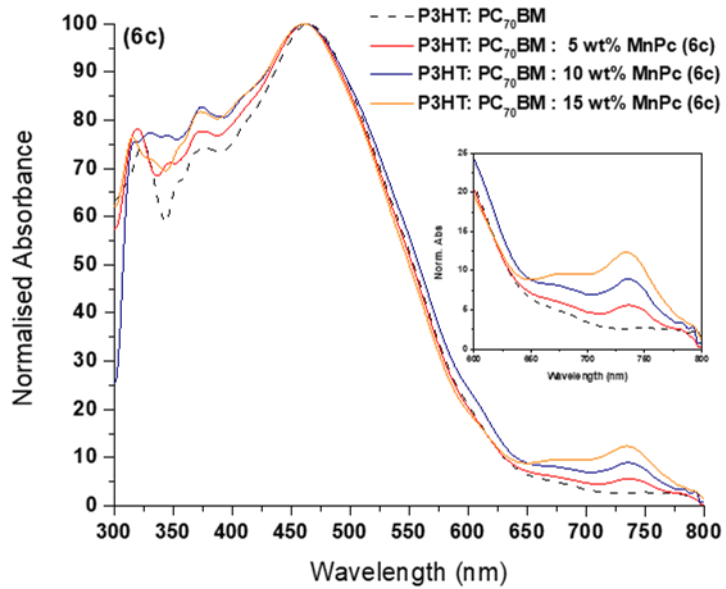

Figure S25. UV-vis spectra of MnPc complexes (6a and 6c) for optimisation studies.

(j) Reverse J-V curve scans

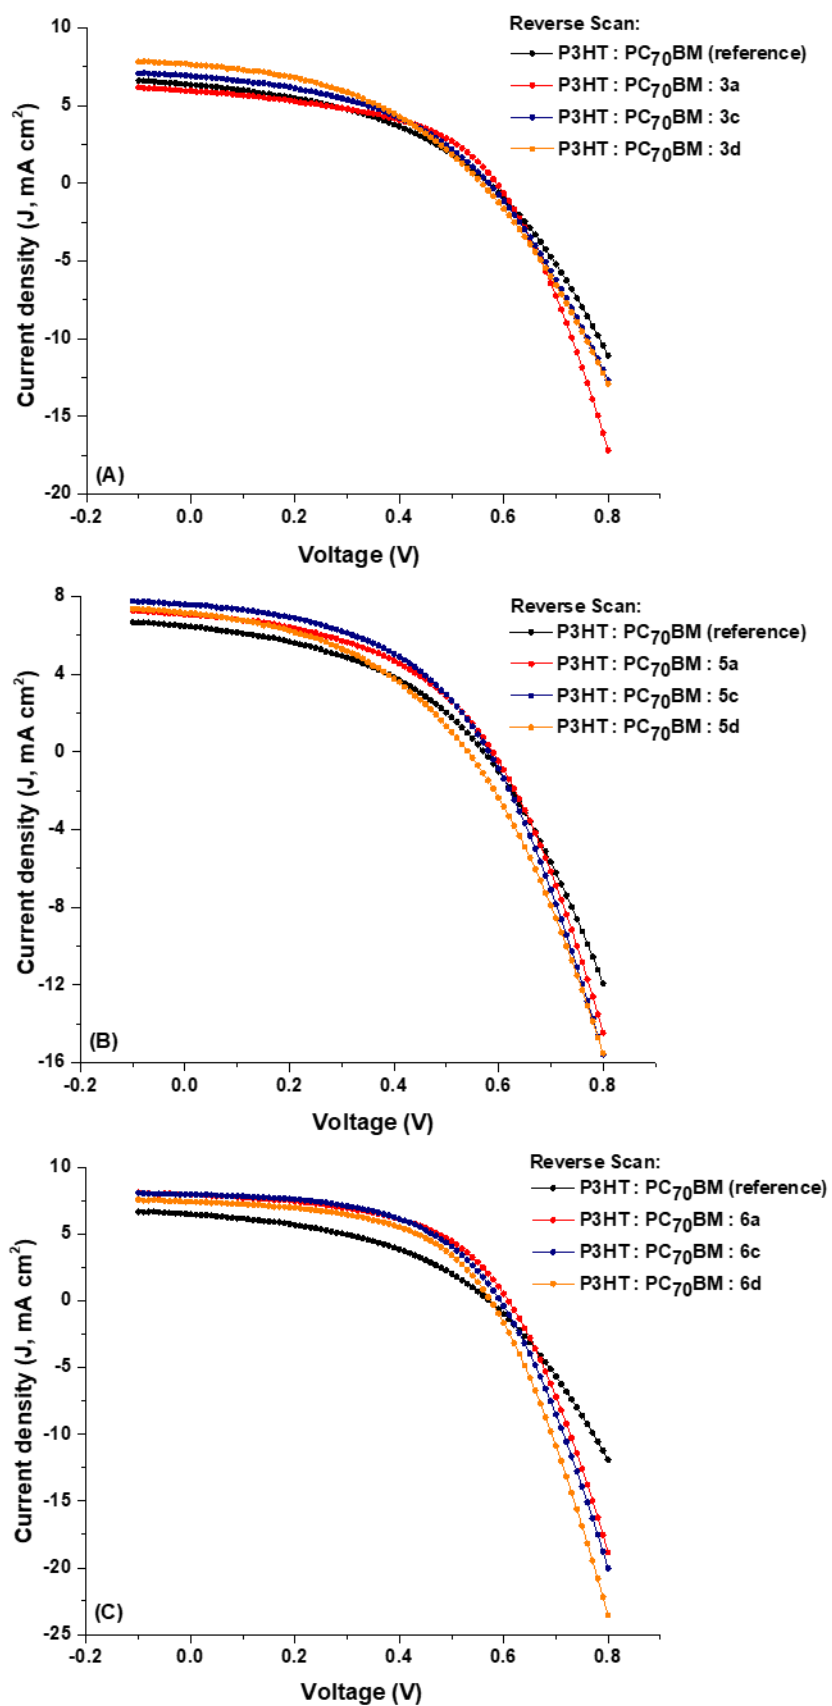

Figure S26. J-V curves (reverse scans) of BHJ OSCs with ternary components (A) 3a, 3c, 3d, (B) 5a, 5c, 5d and (C) 6a, 6c, 6d.



**(k) Performance parameters for reverse J-V curve scans:  $J_{sc}$ ,  $V_{oc}$ , FF and PCE**

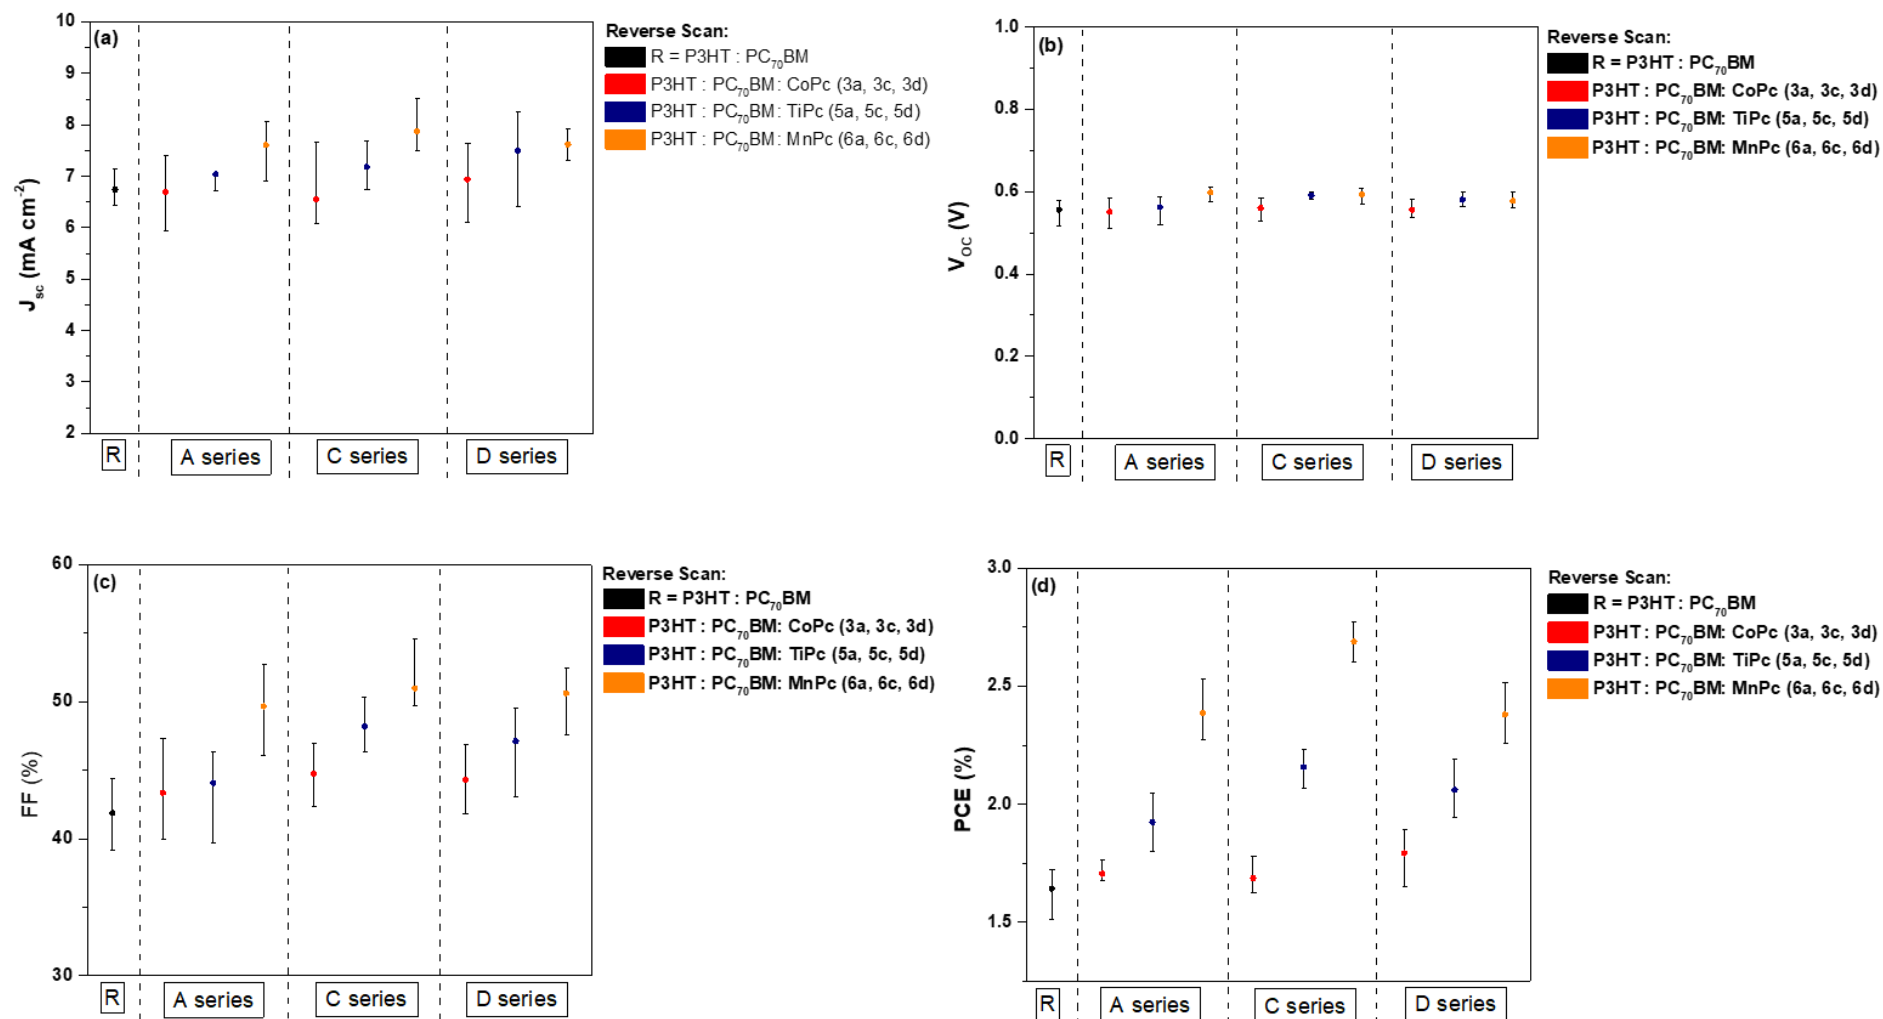

Figure S27. Comparative graphs (reverse scans) for performance parameters (a)  $J_{sc}$ , (b)  $V_{oc}$  (c) FF and (d) PCE of BHJ OSCs with MPcs (3a, 3c, 3d, 5a, 5c, 5d and 6a, 6c, 6d) as ternary components.

(k) Forward and Reverse J-V curve scans

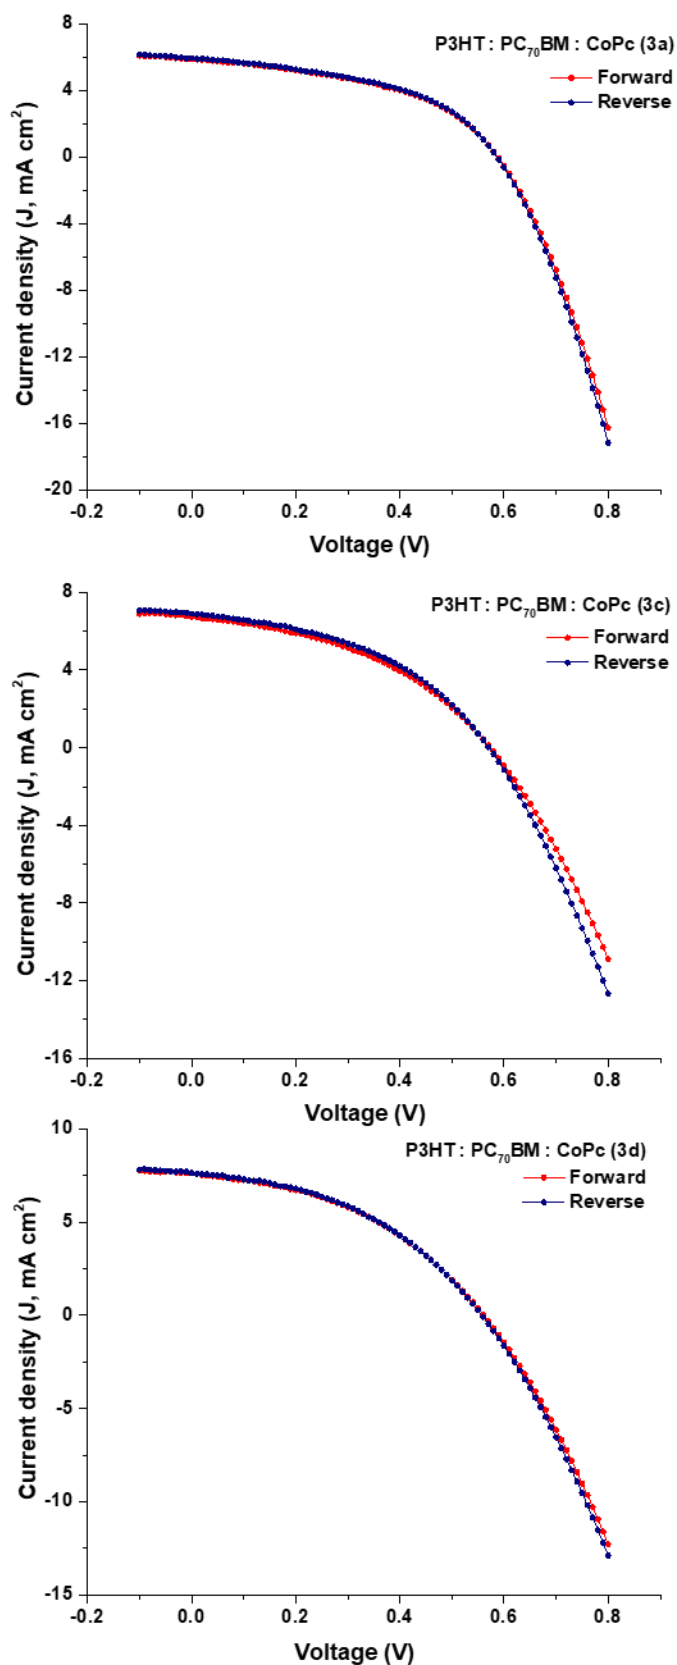

Figure S28. J-V curves (forward and reverse scans) of BHJ OSCs with CoPc (3a, 3c, 3d) ternary components.

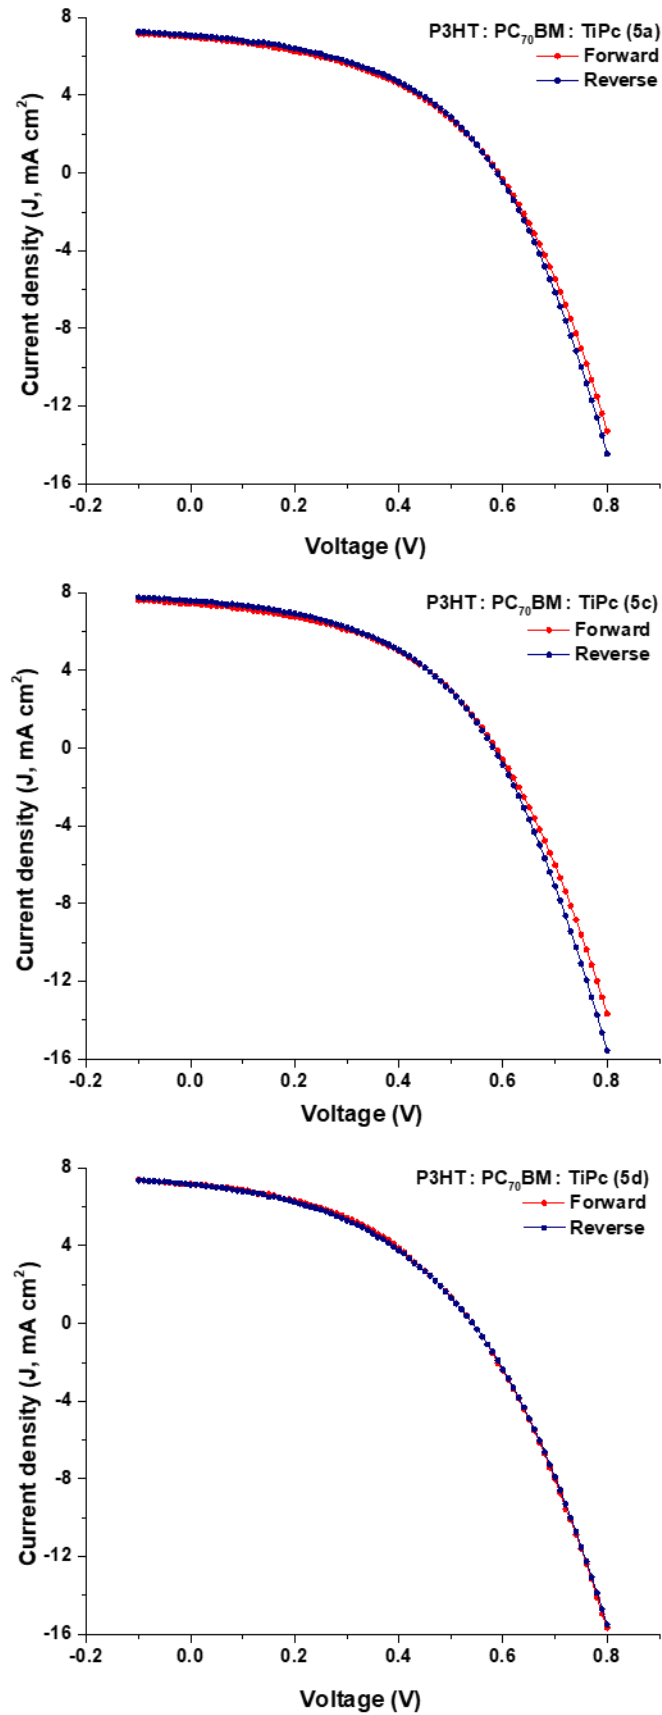

Figure S29. J-V curves (forward and reverse scans) of BHJ OSCs with TiPc (5a, 5c, 5d) ternary components.

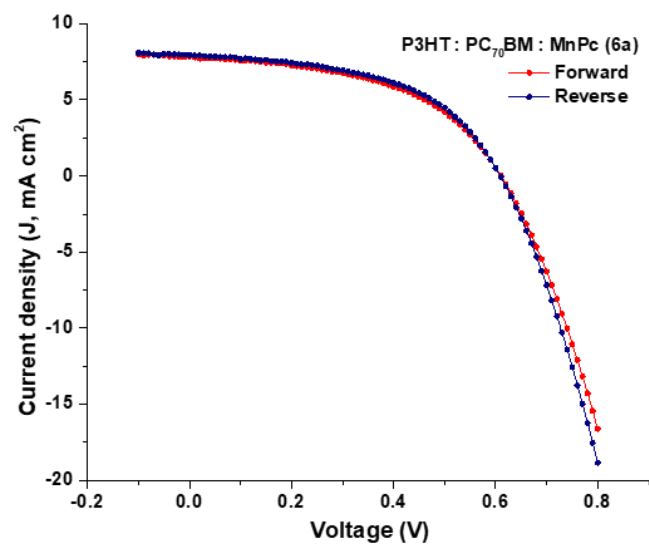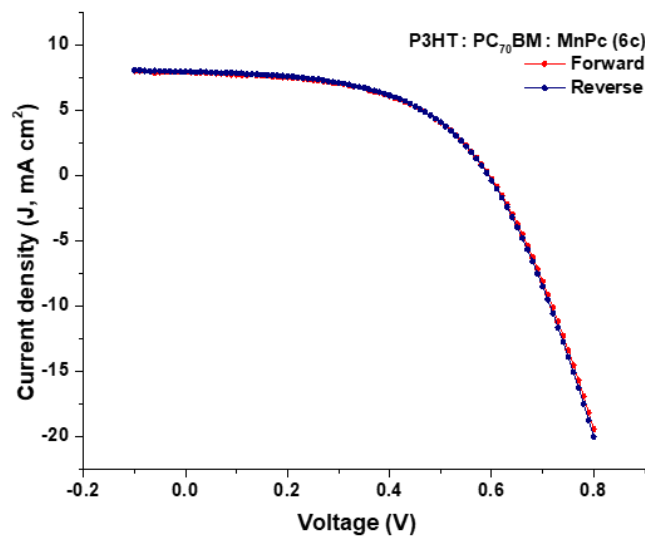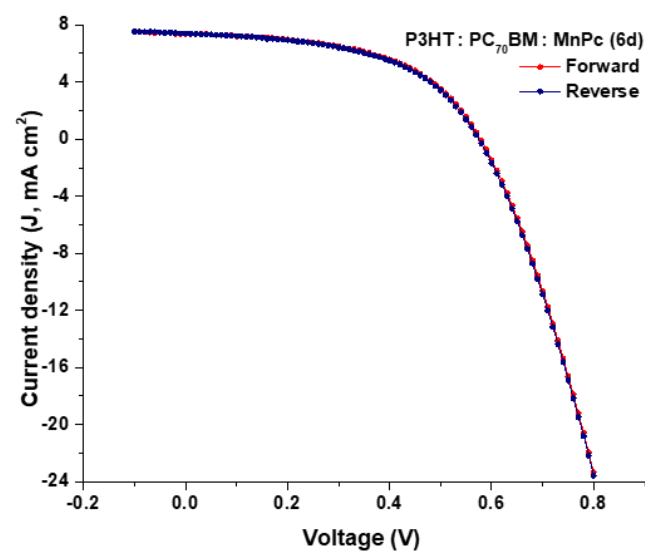

Figure S30. J-V curves (forward and reverse scans) of BHJ OSCs with MnPc (**6a**, **6c**, **6d**) ternary components.
